# Supplementary material for: Mesogenic [Rh(L)4](A) complexes form mesophases with RhI⋯RhI-containing and triphenylene-discotic segregated columns. Effect of RhI⋯RhIinteractions and A−= [Au(CN)2]−on hole mobility
Source: Royal Society of Chemistry journal article supplement (doi:10.1039/d2tc02272a), 2022-12-22
Supplement: d2tc02272a1.pdf [file d2tc02272a1.pdf]

## ELECTRONIC SUPPLEMENTARY INFORMATION

### Mesogenic [Rh(L)<sub>4</sub>](A) Complexes Form Mesophases with Rh<sup>I</sup>...Rh<sup>I</sup>-Containing and Triphenylene-Discotic Segregated Columns. Effect of Rh<sup>I</sup>...Rh<sup>I</sup> Interactions and A<sup>-</sup> = [Au(CN)<sub>2</sub>]<sup>-</sup> on Hole Mobility

Verónica Conejo-Rodríguez,<sup>†</sup> Bertrand Donnio,<sup>\*,‡</sup> Benoît Heinrich,<sup>‡</sup> Roberto Termine,<sup>&</sup> Attilio Golemme,<sup>&</sup> and Pablo Espinet<sup>\*,†</sup>.

<sup>†</sup>IU CINQUIMA/Química Inorgánica, Facultad de Ciencias, Universidad de Valladolid, E-47071 Valladolid, Spain

<sup>‡</sup>Institut de Physique et Chimie des Matériaux de Strasbourg (IPCMS), UMR 7504 (CNRS-Université de Strasbourg), F-67034 Strasbourg Cedex 2, France.

<sup>&</sup>LASCAMM CR-INSTM, CNR-Nanotec, Dipartimento di Fisica, 87036 Rende, Italy.

E-mail: [espinet@qi.uva.es](mailto:espinet@qi.uva.es)

#### Table of Contents

|                                                                                                                   |     |
|-------------------------------------------------------------------------------------------------------------------|-----|
| <b>General remarks</b> .....                                                                                      | S2  |
| <b>Synthesis and characterization of the ligands and complexes</b> .....                                          | S4  |
| <sup>1</sup> H-NMR, <sup>13</sup> C { <sup>1</sup> H}-NMR and <sup>19</sup> F NMR spectra                         |     |
| <sup>1</sup> H NMR comments                                                                                       |     |
| MALDI-TOF and Elemental Analyses                                                                                  |     |
| Infrared spectra. Table ESI 1: ν(C≡N) table and comments.                                                         |     |
| <b>UV-Visible Data</b> .....                                                                                      | S39 |
| <b>Refinement data of the X-Ray structures</b> .....                                                              | S42 |
| Single crystals                                                                                                   |     |
| Mesophases                                                                                                        |     |
| Mesomorphic, Structural, and Geometrical Parameters for complexes [Rh(L <sup>Di</sup> ) <sub>4</sub> ]A (i = 1,2) |     |
| Table ESI 14.                                                                                                     |     |
| <b>POM (polarized optical microscopy)</b> .....                                                                   | S53 |
| <b>DSC (differential scanning calorimetry)</b> .....                                                              | S55 |
| <b>Electrochemical Studies</b> .....                                                                              | S58 |
| <b>Hole mobility Measurements</b> .....                                                                           | S61 |

## GENERAL REMARKS

All reactions were carried out under dry N<sub>2</sub>. The solvents were purified according to standard procedures.<sup>1</sup> [Rh(COD)Cl]<sub>2</sub>,<sup>2</sup> [Rh(COD)<sub>2</sub>](BF<sub>4</sub>),<sup>3</sup> 4-methylphenylisocyanide (**L<sup>A</sup>**),<sup>4</sup> and 2-(6-(4-isocyanophenoxy)hexyloxy)-3,6,7,10,11-pentakis(hexyloxy)triphenylene (**L<sup>D1</sup>**),<sup>5</sup> were prepared according to literature procedures. Only representative examples are described, as the syntheses were similar for the rest of the complexes. Yields, and IR and analytical data are given for all the complexes. The precursor 3,5-dimethoxyaniline and the ligands Xylylisocyanide (**L<sup>X</sup>**) and *p*-methoxyphenylisocyanide (**L<sup>B</sup>**) were purchased from commercial suppliers and used as received.

Infrared spectra were recorded with Perkin–Elmer Frontier (4000–200 cm<sup>-1</sup>) equipped with an ATR accessory (Attenuated total reflection) for the direct recording of solid samples. Visible absorption spectra of solutions were recorded in a Shimadzu UV-2550 spectrophotometer. Luminescence spectra were recorded with a Perkin-Elmer LS-55 spectrometer. The NMR spectra were recorded with Bruker Avance 400 Ultrashield, and Varian 500/54 Premium Shielded instruments. The <sup>1</sup>H and <sup>19</sup>F NMR spectra are referenced to tetramethylsilane (TMS), and CFC<sub>3</sub> respectively.

The elemental analyses were performed with a Carlo Erba 1108 microanalyzer (Vigo University). MALDI-TOF MS was performed using a Bruker Daltonics autoflex speed instrument equipped with nitrogen laser (340 nm). Positive-ion mode spectra were recorded using the reflective mode. The accelerating voltage was 19 kV. The analytical sample was obtained by mixing the dichloromethane solution of the sample (1 mg/mL) and a dichloromethane solution of the matrix (DCTB, 10 mg/mL) in a 1/5 (vol/vol) ratio. The prepared solution of the sample and the matrix (0.5 μL) was loaded on the MALDI plate and allowed to dry at 23°C before the plate was inserted into the vacuum chamber of the MALDI instrument.

Microscopy studies were carried out on a Leica DMRB microscope equipped with a Mettler FP82HT hot stage and a Mettler FP90 central processor, at a heating rate of 10°C min<sup>-1</sup>. For differential scanning calorimetry (DSC) a Perkin-Elmer DSC7 instrument was used, which was calibrated with water and indium. The scanning rate was 10 °C min<sup>-1</sup>, the samples were sealed in aluminium capsules in the air, and the holder atmosphere was dry nitrogen.

### Experimental procedure for X-ray Crystallography

A single crystal was attached to a glass fiber and transferred to an Agilent Supernova diffractometer with an Atlas CCD area detector. Data collection was performed with Mo-K $\alpha$  radiation ( $\lambda = 0.71073 \text{ \AA}$ ) or Cu-K $\alpha$  ( $\lambda = 1.54184 \text{ \AA}$ ). Data integration, scaling and empirical absorption correction was carried out using the CrysAlisPro program package.<sup>6</sup> The crystal was kept at 294 K during data collection. Using Olex2,<sup>7</sup> the structure was solved with the olex2.solve<sup>8</sup>

and refined with Shelx program<sup>9</sup>. The non-hydrogen atoms were refined anisotropically and hydrogen atoms were placed at idealized positions and refined using the riding model. Refinement proceeded smoothly to give the residuals shown at the end of the SI section. CCDC 2091366-2091367 contain the supporting crystallographic data for this paper. These data can be obtained free of charge at [www.ccdc.cam.ac.uk/conts/retrieving.html](http://www.ccdc.cam.ac.uk/conts/retrieving.html) [or from the Cambridge Crystallographic Data Centre, 12, Union Road, Cambridge CB2 1EZ, UK; fax: (internat.) +44-1223/336-033; E-mail: [deposit@ccdc.cam.ac.uk](mailto:deposit@ccdc.cam.ac.uk)].

The SWAXS patterns were obtained with a transmission Guinier-like geometry. A linear focalized monochromatic Cu K $\alpha$ 1 beam ( $\lambda = 1.5405 \text{ \AA}$ ) was obtained using a sealed-tube generator (600 W) equipped with a bent quartz monochromator. In all cases, the crude powder was filled in Lindemann capillaries of 1 mm diameter and 10  $\mu\text{m}$  wall-thickness. The wide-angle regions were recorded with a curved Inel CPS120 counter gas-filled detector linked to a data acquisition computer (periodicities up to 90  $\text{\AA}$ ). The small-angle regions were also recorded on image plates and scanned with Amersham Typhoon IP with 25  $\mu\text{m}$  resolution (periodicities up to 120  $\text{\AA}$ ).

GIWAXS measurements were conducted at PLS-II 9A U-SAXS beamline of Pohang Accelerator Laboratory (PAL) in Korea. Samples consisted in layers on silicon wafer of thirty to sixty nanometers thickness. The X-rays coming from the vacuum undulator (IVU) were monochromated using Si(111) double crystals and focused on the detector using K-B type mirrors. Patterns were recorded with a Rayonix 2D SX 165 CCD detector. The sample-to-detector distance was about 225 mm for energy of 11.015 keV (1.1256  $\text{\AA}$ ).

## SYNTHESIS OF THE COMPOUNDS

### a. Synthesis of the ligands

#### 3,5-Dimethoxyphenylformamide (**1**)

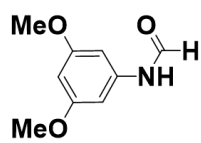

8 g of 3,5-dimethoxyaniline (0.052 mol) were dissolved in 70 mL of formic acid, refluxed for 7 h, and then stirred overnight at room temperature. The solution was evaporated to dryness and the dark solid residue was purified by column chromatography in  $\text{CHCl}_3$ . The yellow fractions were dried and the solid was recrystallized from  $\text{CH}_2\text{Cl}_2/\text{Et}_2\text{O}$  to obtain a white solid. This solid was washed with  $\text{Et}_2\text{O}$  ( $2 \times 10$  mL) and n-hexane ( $2 \times 5$  mL). Yield: 7.5 g (79%).

$^1\text{H}$  NMR (400.14 MHz,  $\text{CDCl}_3$  298 K, Figure ES11) two conformational isomers:  $\delta$  8.67 (bs, 1H, *CHO*), 8.33 (bs, 1H, *CHO*); 8.11 (bs, 1H, *NH*), 7.34 (bs, 1H, *NH'*), 6.76 (bs, 2H, *H<sub>I</sub>*), 6.31-6.19 (m, 4H,  $1\text{H}_2 + 2\text{H}_2' + \text{H}_1'$ ), 3.78-3.75 (m, 12H,  $2 \times \text{OCH}_3$ ).

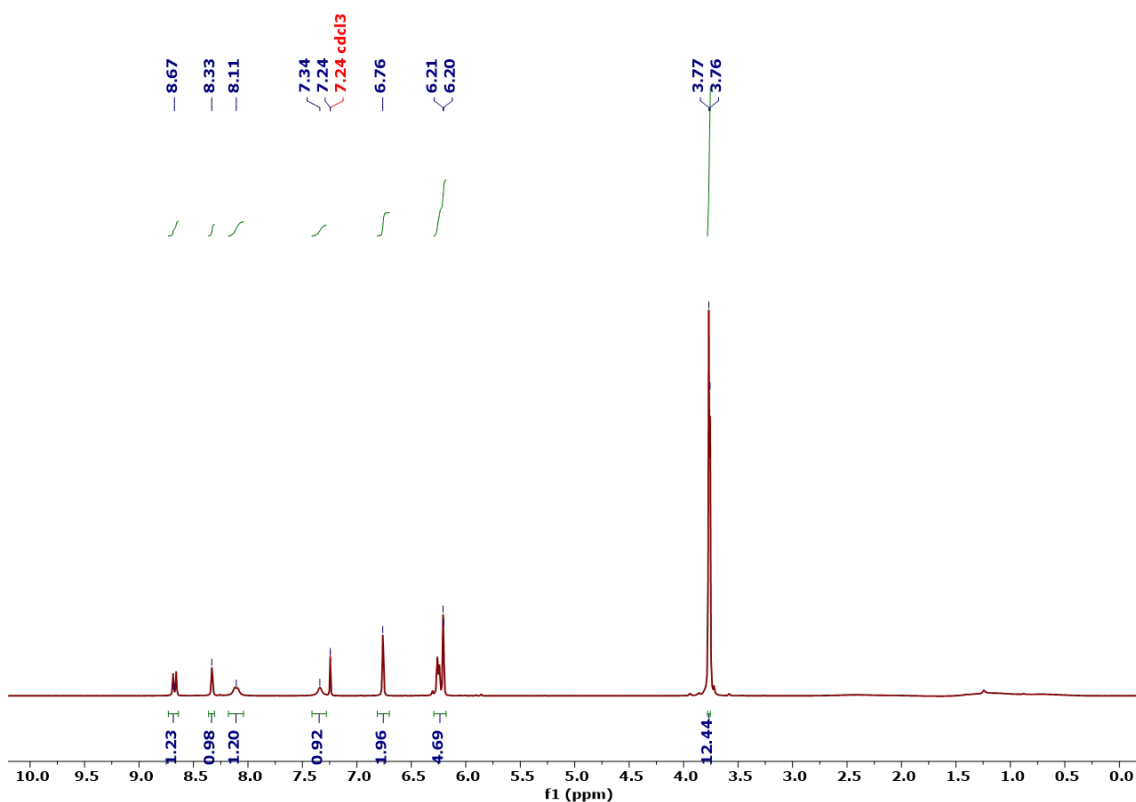

Figure ES1.  $^1\text{H}$  NMR spectrum of **1** at 298 K in  $\text{CDCl}_3$

**Ligand L<sup>C</sup> 3,5-(OMe)<sub>2</sub>C<sub>6</sub>H<sub>3</sub>(NC) (2)**

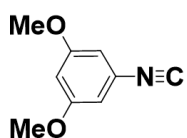

**L<sup>C</sup> (2)**

A solution 3,5-Dimethoxyphenylformamide (1) (4 g, 22 mmol) and triethylamine (8.5 mL, 60 mmol) in dry dichloromethane (60 mL), under nitrogen atmosphere, was cooled down in an ice bath at 0 °C and a solution of bistrichloromethyl carbonate (triphosgene; 2.4 g, 8.1 mmol) in dry dichloromethane (15 mL) was added dropwise under stirring. The mixture was stirred at room temperature for 2 h and some white solid precipitated. Water and CH<sub>2</sub>Cl<sub>2</sub> were added until complete dissolution of the precipitate. The organic phase was separated and this orange solution was dried by MgSO<sub>4</sub> anhydrous and evaporated to dryness. The resulting product was purified by column chromatography (silica gel, (n-hexane/ether 3:1)) to obtain a crystalline white solid. Yield: 2.5 g (69%).

<sup>1</sup>H NMR (499.72 MHz, CDCl<sub>3</sub> 298 K, Figure ESI2): δ 6.51 (d, J = 2.3 Hz, 2H, H<sub>o</sub>), 6.47 (t, J = 2.3 Hz, 1H, H<sub>p</sub>); 3.78 (s, 6H, 2x OCH<sub>3</sub>). <sup>13</sup>C {<sup>1</sup>H} NMR (125.67 MHz, CDCl<sub>3</sub> 298 K, Figure ESI3): δ 163.54 (1C, Rh-CN), 161.01 (2C, C<sub>Ph</sub>-O), 127.68 (1C, C<sub>Ph</sub>-N), 104.75 (2C, C<sub>Ph</sub>-H<sub>o</sub>), 102.08 (2C, C<sub>Ph</sub>-H<sub>p</sub>), 55.63 (2C, -OCH<sub>3</sub>).

IR (ATR, cm<sup>-1</sup>): 2134 (ν<sub>CN</sub>).

Anal. Calcd. for C<sub>9</sub>H<sub>9</sub>NO<sub>2</sub>: C, 65.84; H, 6.14; N, 8.53; found C, 66.05; H, 5.99; N, 8.45.

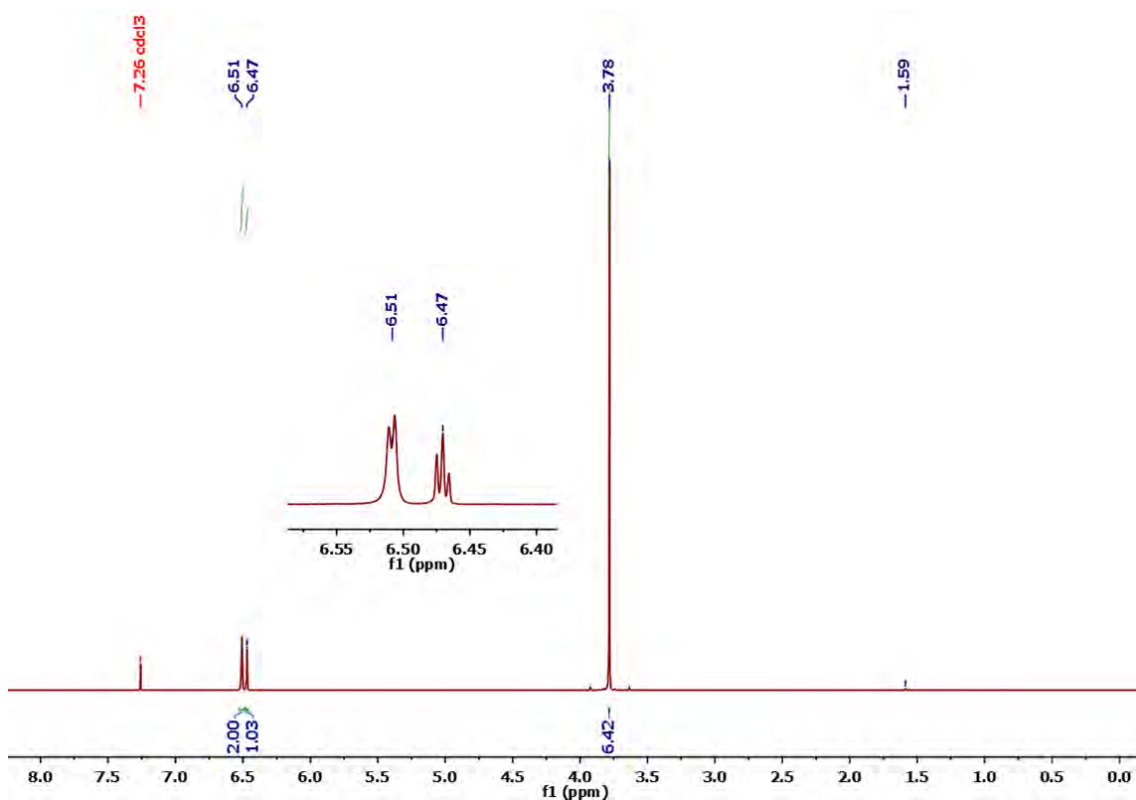

**Figure ESI2.** <sup>1</sup>H NMR spectrum of L<sup>C</sup> (2) at 298 K in CDCl<sub>3</sub>

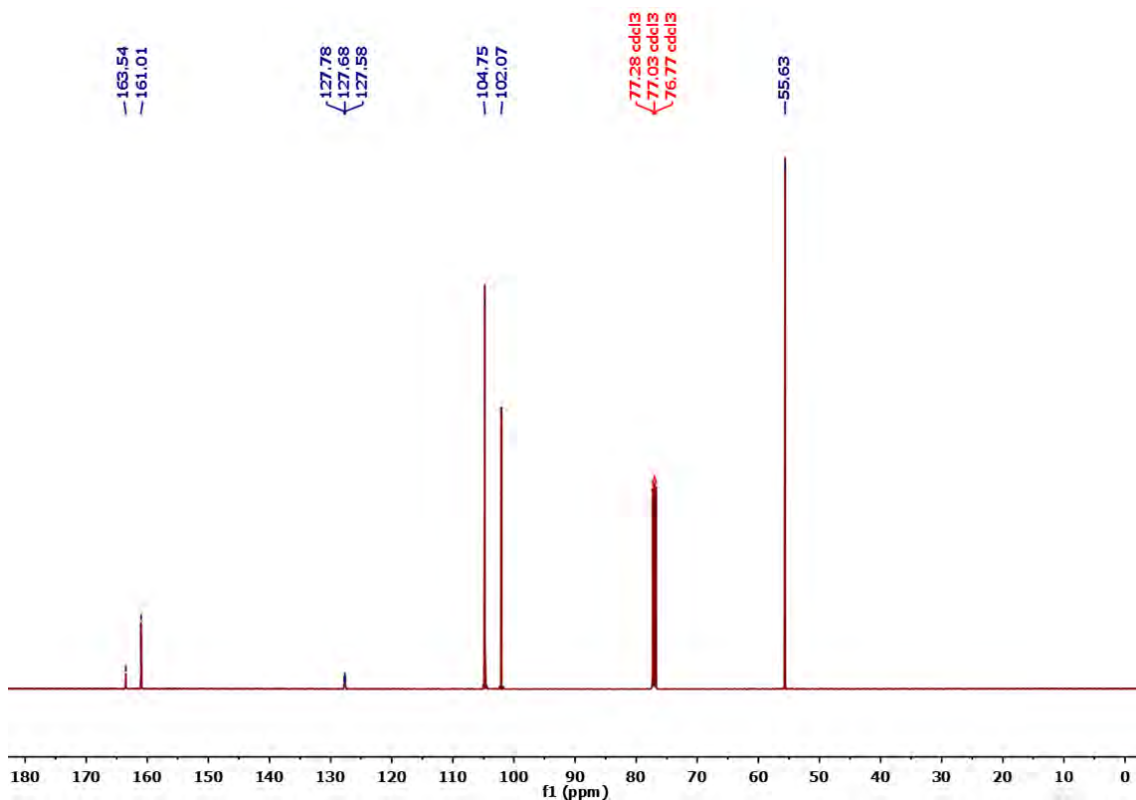

Figure ESI3.  $^{13}\text{C}\{^1\text{H}\}$  NMR spectrum of  $\text{L}^{\text{C}}$  (**2**) at 298 K in  $\text{CDCl}_3$

### Preparation of 5-((6-bromohexyl)oxy)-1,3-dimethyl-2-nitrobenzene (**3**)

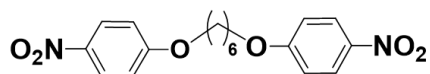

**Byproduct (3')**

$\text{K}_2\text{CO}_3$  (3.9 g, 28.1 mmol) was added to a solution of 3,5-dimethyl-4-nitrophenol (3.5 g, 21 mmol) and 1,6-dibromohexane (3.6 g, 23 mmol) in butanone (100 mL) under nitrogen. After refluxing for 48 h, the solvent was evaporated to dryness and a yellow residue was obtained. Then water (200 mL) was added, and the organic product was extracted from the stirred mixture with dichloromethane ( $2 \times 50$  mL), and dried with  $\text{MgSO}_4$ . The dry solution was concentrated to a small volume. Addition of diethyl ether and cooling in the freezer overnight at  $-22$  °C afforded a yellow-greenish precipitate which was filtered off, washed with diethyl ether and identified as **Byproduct (3')**.

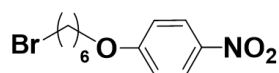

**(3)**

The combined yellow solution plus the washing diethyl ether solutions, were vacuum evaporated to dryness, and the resulting yellow residue was extracted in n-hexane and crystallized upon cooling the solution at  $-22$  °C overnight. Yellow crystals of **3** were obtained (4.74 g, 68 % yield).

$^1\text{H}$  NMR (499.72 MHz,  $\text{CDCl}_3$ , 298 K, Figure ESI4):  $\delta$  6.59 (s, 2H, Ar-H), 3.96 (t,  $J = 6.4$  Hz, 2H, O- $\text{CH}_2$ ), 3.42 (t,  $J = 6.7$  Hz, 2H, Br- $\text{CH}_2$ ), 2.33 (s, 6H,  $2 \times \text{CH}_3$  Xylyl), 1.89 (q, 2H, O- $\text{CH}_2$ - $\text{CH}_2$ ), 1.79 (q, 2H, Br- $\text{CH}_2$ - $\text{CH}_2$ ), 1.50 (m, 4H, O- $\text{CH}_2$ -( $\text{CH}_2$ ) $_n$  + Br- $\text{CH}_2$ -( $\text{CH}_2$ ) $_n$ ).

$^{13}\text{C}\{^1\text{H}\}$  NMR (125.67 MHz,  $\text{CDCl}_3$ , 298 K, Figure ESI5):  $\delta$  159.58 ( $\text{OC}_{Ph}$ ), 145.37 ( $\text{NC}_{Ph}$ ), 132.40 ( $\text{C}_{Ph}$ ), 114.35 ( $\text{H-C}_{Ph}$ ), 68.00 (O- $\text{CH}_2$ ), 33.71 (Br- $\text{CH}_2$ -), 32.60 (O- $\text{CH}_2$ - $\text{CH}_2$ ), 28.90 (Br- $\text{CH}_2$ - $\text{CH}_2$ ), 27.03 (O- $\text{CH}_2$ - $\text{CH}_2$ - $\text{CH}_2$ ), 25.20 (Br- $\text{CH}_2$ - $\text{CH}_2$ - $\text{CH}_2$ ), 18.41 ( $\text{CH}_3$  Xylyl).

MS (ESI-TOF):  $m/z$  calc. for  $[\text{M}+\text{Na}]^+$  ( $\text{M} = \text{C}_{14}\text{H}_{20}\text{BrNNaO}_3$ ): 352.0519; found: 352.0526. *Anal.* Calcd. (%) for  $\text{C}_{14}\text{H}_{20}\text{BrNO}_3$ : C, 50.92; H, 6.10; N, 4.24; found C, 51.02; H, 6.10; N, 4.18.

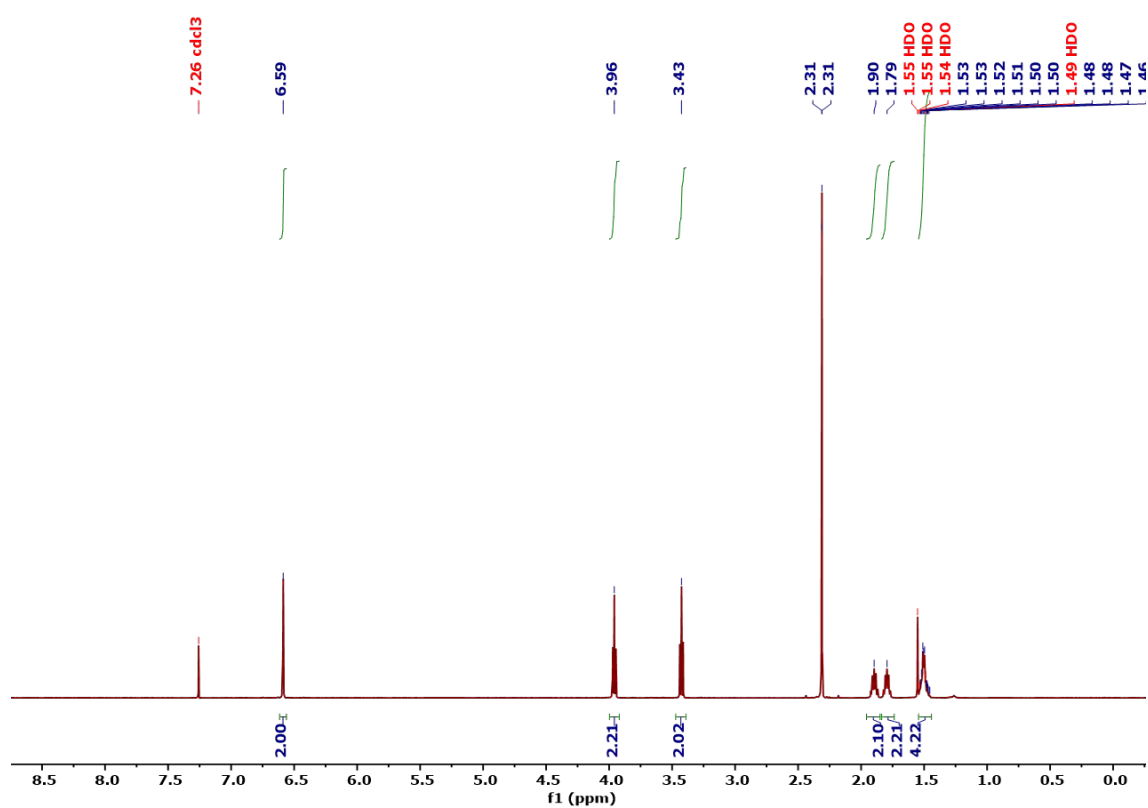

Figure ESI4.  $^1\text{H}$  NMR spectrum of **3** at 298 K in  $\text{CDCl}_3$

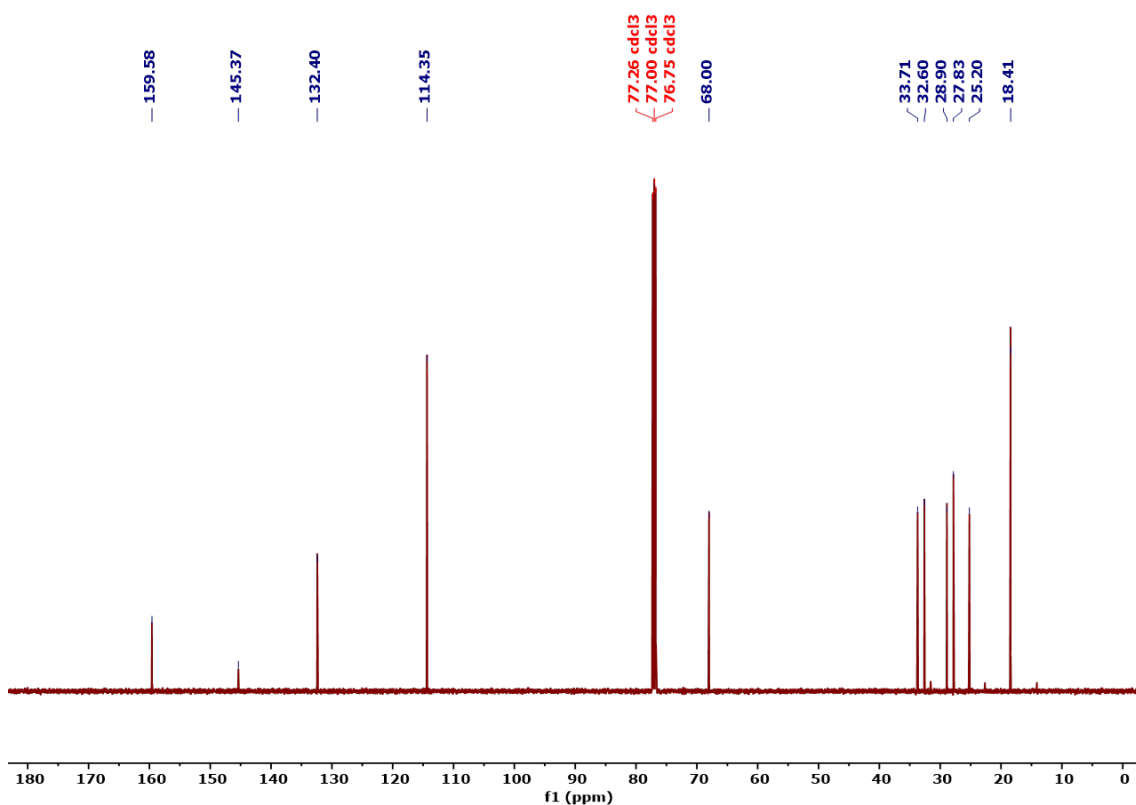

Figure ESI5.  $^{13}\text{C}\{^1\text{H}\}$  NMR spectrum of **3** at 298 K in  $\text{CDCl}_3$

**Synthesis of 2-(6-(3,5-dimethyl-4-nitrofenoxyl)hexyloxy)-3,6,7,10,11-pentakis(dodecyloxy)triphenylene (**4**) *figura cambiada***

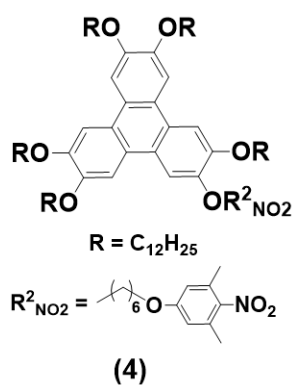

To a solution of monohydroxy-3,6,7,10,11-pentakis(dodecyloxy)triphenylene (1.35 g, 1.16 mmol) and 5-((6-bromohexyl)oxy)-1,3-dimethyl-2-nitrobenzene (3.1 g, 9.4 mmol) in dry 2-butanone (40 mL), under nitrogen, was added  $\text{K}_2\text{CO}_3$  (1.0 g, 6.9 mmol). The mixture was stirred at 100 °C for 24 h. Then water (50 mL) was added and the mixture was extracted with dichloromethane ( $2 \times 50$  mL). The combined organic layers were dried over  $\text{MgSO}_4$  and the solvent was evaporated under vacuum. The crude product was

purified by column chromatography (silica gel, hexane/dichloromethane 3:1 v/v to 2:1 as eluent) to give yellow **4**. Yield: 1.25 g, 77 %.

$^1\text{H}$  NMR (499.72 MHz,  $\text{CDCl}_3$  298 K, Figure ESI6):  $\delta$  7.84 (s, 6H, Ar-H), 6.59 (s, 2H, Ar-H). 4.26-4.21 (m, 12H, O- $\text{CH}_2$ ), 3.98 (t,  $J = 6.4$  Hz, 2H, O- $\text{CH}_2$ ), 2.30 (s, 6H,  $2 \times \text{CH}_3$  Xylyl), 2.02-1.82 (m, 14H, O- $\text{CH}_2$ - $\text{CH}_2$ ), 1.72-1.54 (m, 14H, O- $\text{CH}_2$ - $\text{CH}_2$ - $\text{CH}_2$ ), 1.46-1.23 (m, 80H,  $(\text{CH}_2)_n$ ), 0.90-0.86 (m, 15H,  $\text{CH}_3$ ).



$^{13}\text{C}\{^1\text{H}\}$  NMR (125.67 MHz,  $\text{CDCl}_3$  298 K, Figure ESI7):  $\delta$  159.65 ( $\text{OC}_{Ph}$ ), 149.06, 149.04, 149.00, 148.96, 148.95, 148.82 ( $\text{O-C}_{TriPh}$ ), 132.39 ( $\text{CH}_3\text{-C}_{Ph}$ ), 123.72, 123.69, 123.65, 123.57, 123.56, 123.55 ( $\text{C}_{TriPh}$ ), 114.34 ( $\text{H-C}_{Ph}$ ), 110.00 ( $\text{N-C}_{Ph}$ ), 107.09, 107.03, 107.01, 107.00, 106.99, 106.92 ( $\text{H-C}_{TriPh}$ ), 69.84, 69.76, 69.72, 69.69, 69.60, 69.49, 68.13 ( $\text{O-CH}_2$ ), 31.93, 29.73, 29.71, 29.68, 29.55, 29.53, 29.49, 29.47, 29.38, 29.12, 26.21, 25.95, 25.84, 22.69 ( $-\text{CH}_2-$ ), 18.42 ( $-\text{CH}_3$  Xylyl), 14.11 ( $-\text{CH}_3$ ).

MS (MALDI-TOF):  $m/z$  calc. for  $[\text{M}]$  ( $\text{M} = \text{C}_{92}\text{H}_{151}\text{NO}_9$ ): 1411.1383; found: 1414.1378.

Anal. Calcd. (%) for  $\text{C}_{92}\text{H}_{151}\text{NO}_9$ : C, 78.08; H, 10.75; N, 0.99; found C, 78.39; H, 10.96; N, 0.99.

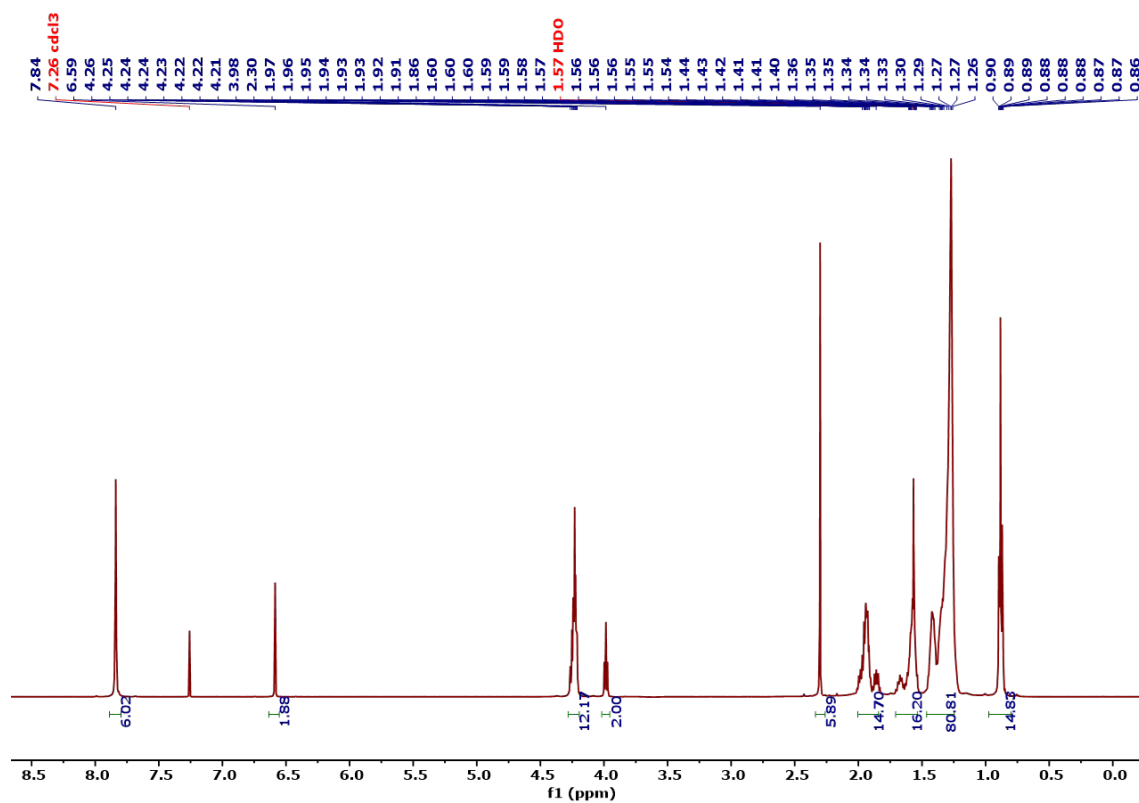

Figure ESI6.  $^1\text{H}$  NMR spectrum of 4 at 298 K in  $\text{CDCl}_3$

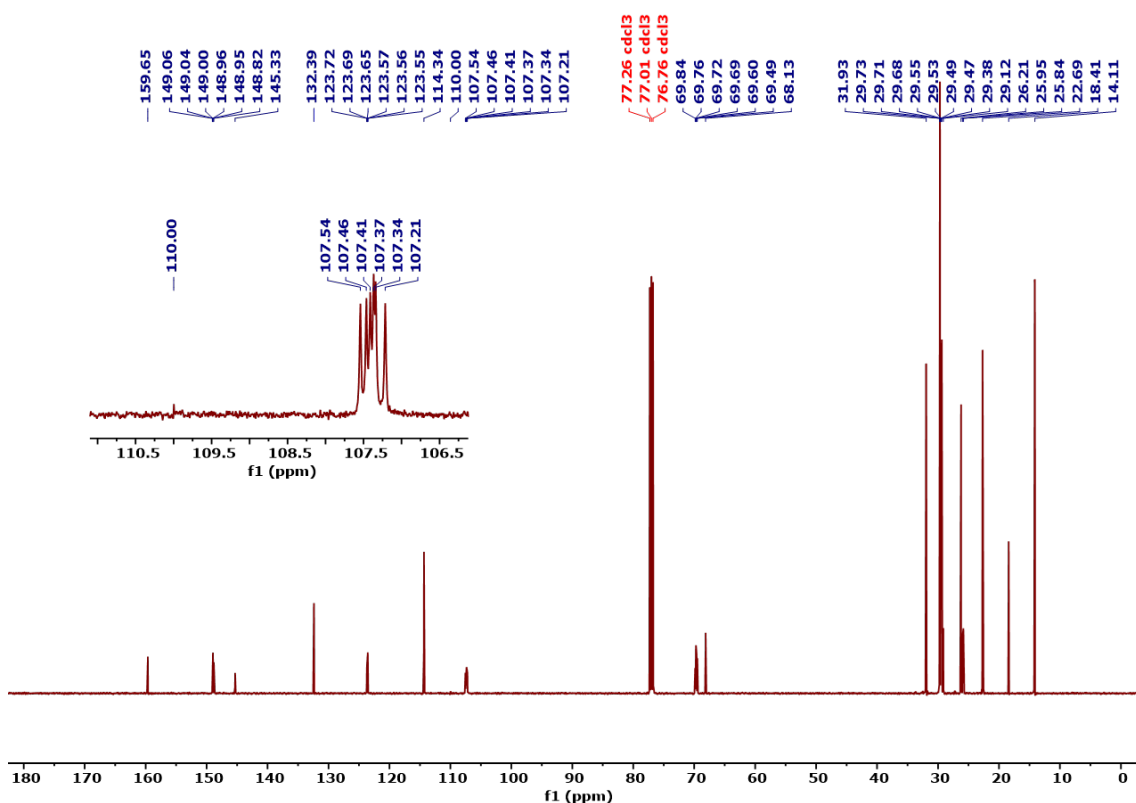

Figure ESI7.  $^{13}\text{C}\{^1\text{H}\}$  NMR spectrum of **4** at 298 K in  $\text{CDCl}_3$

**Synthesis of 2-(6-(3,5-Dimethyl-4-formylaminofenoxy)hexyloxy)-3,6,7,10,11-pentakis(dodecyloxy)triphenylene. (5) *figura cambiada***

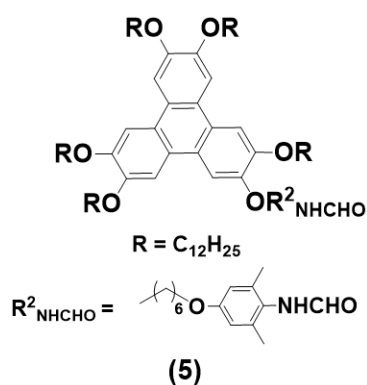

To a mixture of 2-(6-(3,5-dimethyl-4-nitrofenoxi)hexyloxy)-3,6,7,10,11 pentakis(dodecyloxy)triphenylene (1.2 g, 0.86 mmol) in toluene (60 mL) and formic acid (40 mL), powder tin (0.76 g) was added. The mixture was refluxed for 4 h. After cooling to room temperature, water (200 mL) was added and the mixture was extracted with toluene ( $2 \times 40$  mL). The combined organic layers were dried over  $\text{MgSO}_4$  and the solvent was evaporated under vacuum to give **5** as a white solid (1.17 g, 96 % yield).

$^1\text{H}$  NMR (499.72 MHz,  $\text{CD}_2\text{Cl}_2$  298 K, Figure ESI8): two conformational isomers:  $\delta$  8.33 (s, 1H, CHO), 7.97 (s, 1H, CHO), 7.85 (s, 6H, Ar-H), 6.66 (bs, 1H, NH), 6.64 (s, 2H, Ar-H), 4.27-4.22 (m, 12H, O- $\text{CH}_2$ ), 3.98 (t,  $J = 6.5$  Hz, 4H, O- $\text{CH}_2$ ), 2.55 (s, 3H,  $\text{CH}_3$ , Xylyl), 2.19 (s, 3H,  $\text{CH}_3$ , Xylyl), 2.01-1.83 (m, 14H, O- $\text{CH}_2$ - $\text{CH}_2$ ), 1.72-1.54 (m, 14H, O- $\text{CH}_2$ - $\text{CH}_2$ - $\text{CH}_2$ ), 1.49-1.23 (m, 80H,  $(\text{CH}_2)_n$ ), 0.95-0.85 (m, 15H,  $\text{CH}_3$ ).

$^{13}\text{C}\{^1\text{H}\}$  RMN (125.67 MHz,  $\text{CD}_2\text{Cl}_2$  298 K, Figure ESI9):  $\delta$  164.71 (CHO), 159.46 ( $\text{OC}_{Ph}$ ), 149.07, 149.05, 149.03, 149.02, 148.98, 148.95, ( $\text{O-C}_{TriPh}$ ), 137.32 ( $\text{CH}_3\text{-C}_{Ph}$ ), 136.80 ( $\text{CH}_3\text{-C}_{Ph}$ ), 125.90 ( $\text{N-C}_{Ph}$ ), 125.43 ( $\text{N-C}_{Ph}$ ), 123.42, 123.40, 123.37, 123.36, 123.34, 123.33 ( $\text{C}_{TriPh}$ ), 113.99 ( $\text{H-C}_{Ph}$ ), 113.71 ( $\text{H-C}_{Ph}$ ), 107.09, 107.07, 107.04, 107.01, 106.96, 106.94 ( $\text{H-C}_{TriPh}$ ), 69.59, 69.57, 69.53, 69.51, 69.49, 69.48, 69.38, 67.92, 67.87 ( $\text{O-CH}_2$ ), 31.92, 29.73, 29.70, 29.67, 29.52, 29.51, 29.48, 29.46, 29.44, 29.37, 29.29, 26.20, 25.96, 25.85, 22.68 ( $-\text{CH}_2-$ ), 18.72, 18.46 ( $-\text{CH}_3$  Xylyl), 13.87 ( $-\text{CH}_3$ ).

IR (ATR, neat,  $\text{cm}^{-1}$ ): 3252 ( $\nu_{\text{NH}}$ ), 1656 ( $\nu_{\text{C=O}}$ ).

MS (MALDI-TOF):  $m/z$  calc. for  $[\text{M}]$  ( $\text{M} = \text{C}_{93}\text{H}_{153}\text{NO}_8$ ): 1412.1591; found: 1412.1591.

Anal. Calcd. (%) for  $\text{C}_{93}\text{H}_{153}\text{NO}_8$ : C, 79.04; H, 10.91; N, 0.99; found C, 78.84; H, 11.18; N, 0.90.

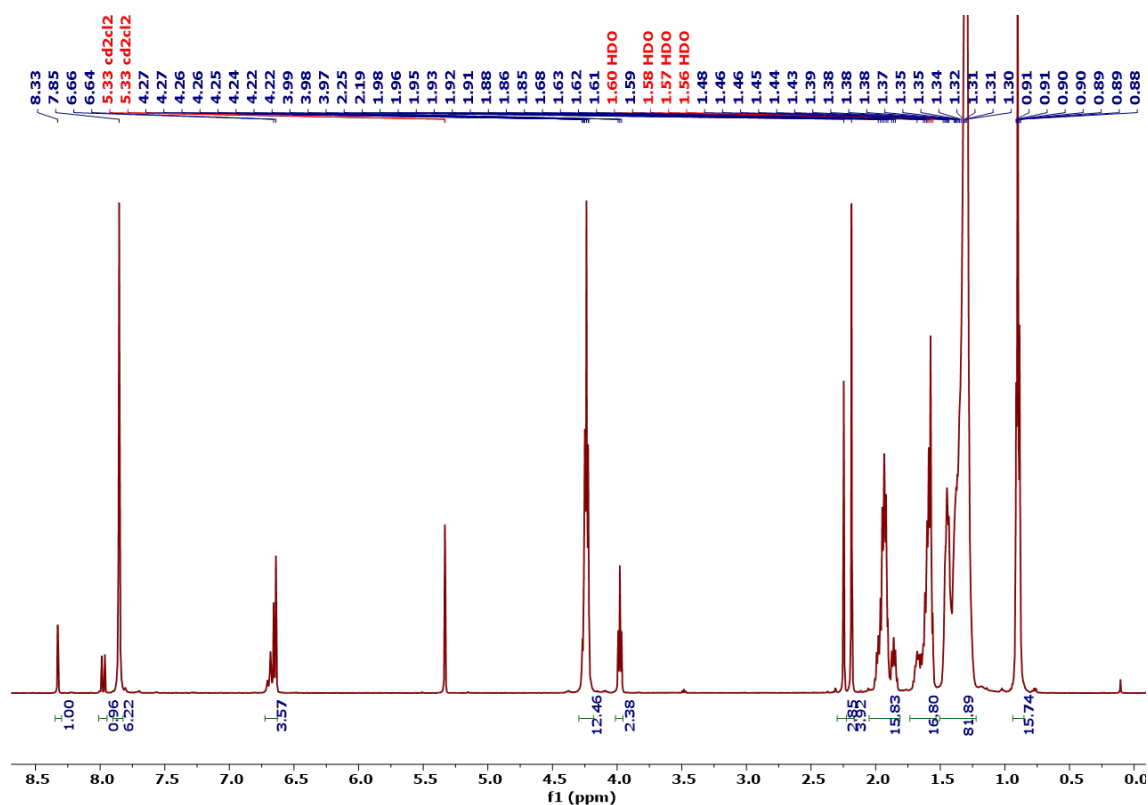

**Figure ESI8.**  $^1\text{H}$  NMR spectrum of **5** at 298 K in  $\text{CD}_2\text{Cl}_2$

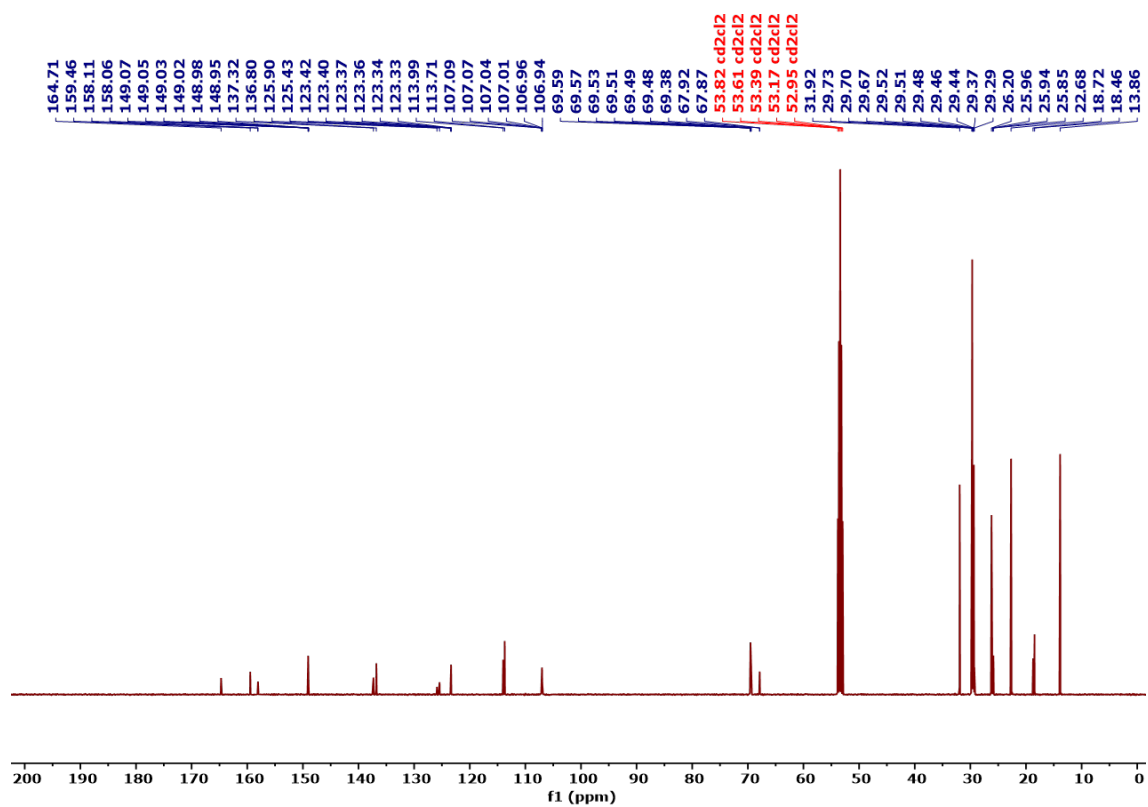

Figure ESI9.  $^{13}\text{C}\{^1\text{H}\}$  NMR spectrum of **5** at 298 K in  $\text{CD}_2\text{Cl}_2$

**Ligand L<sup>D2</sup>**: 2-(6-(3,5-Dimethyl-4-isocyanofenoxy)hexyloxy)-3,6,7,10,11-pentakis (dodecyl)oxytriphenylene, TPh(OC<sub>12</sub>H<sub>25</sub>)<sub>5</sub>(O(CH<sub>2</sub>)<sub>6</sub>C<sub>6</sub>H<sub>2</sub>Me<sub>2</sub>(NC)-*p*) (6) **figura cambiada**

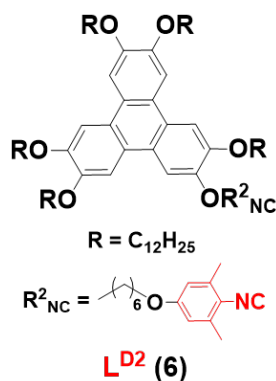

To a solution of 2-(6-(3,5-dimethyl-4-formylaminofenoxy)hexyloxy)-3,6,7,10,11-pentakis(dodecyloxy)triphenylene (1.17 g, 0.83 mmol) and triethylamine (0.32 mL, 2.28 mmol) in dry dichloromethane (50 mL), under nitrogen atmosphere, was added dropwise a solution of bistrichloromethyl carbonate (triphosgene; 0.091 g, 0.31 mmol) in dry dichloromethane (10 mL). The mixture was stirred at room temperature for 1 h and the solvent was pumped off. The resulting residue was purified by column chromatography (silica gel, dichloromethane/hexane 1:1.5 to 1:1) giving **6** as a white solid (0.86 g, 74% yield).

<sup>1</sup>H NMR (499.72 MHz, CD<sub>2</sub>Cl<sub>2</sub> 298 K, Figure ESI10): δ 7.85 (s, 6H, Ar-*H*), 6.63 (s, 2H, Ar-*H*), 4.27-4.22 (m, 12H, O-CH<sub>2</sub>), 3.98 (t, J = 6.5 Hz, 2H, O-CH<sub>2</sub>), 2.37 (s, 6H, (2 × CH<sub>3</sub> Xylyl)), 2.01-1.83 (m, 14H, O-CH<sub>2</sub>-CH<sub>2</sub>), 1.72-1.54 (m, 14H, O-CH<sub>2</sub>-CH<sub>2</sub>-CH<sub>2</sub>), 1.50-1.25 (m, 80H, (CH<sub>2</sub>)<sub>n</sub>), 0.95-0.87 (m, 15H, CH<sub>3</sub>).

<sup>13</sup>C{<sup>1</sup>H} NMR (125.67 MHz, CD<sub>2</sub>Cl<sub>2</sub> 298 K, Figure ESI11): δ 166.77 (CN), 158.73 (OC<sub>Ph</sub>), 149.08, 149.07, 149.05, 149.04, 149.02, 148.93 (O-C<sub>TriPh</sub>), 136.31 (CH<sub>3</sub>-C<sub>Ph</sub>), 123.43, 123.40, 123.39, 123.38, 123.35, 123.33 (C<sub>TriPh</sub>), 119.56 (N-C<sub>Ph</sub>), 113.40 (H-C<sub>Ph</sub>), 107.09, 107.03, 107.01, 107.00, 106.99, 106.92 (H-C<sub>TriPh</sub>), 69.58, 69.56, 69.54, 69.52, 69.46, 69.36, 68.05 (O-CH<sub>2</sub>), 31.93, 29.73, 29.71, 29.68, 29.53, 29.51, 29.42, 29.38, 29.16, 26.21, 25.96, 25.81, 22.69 (-CH<sub>2</sub>-), 18.88 (-CH<sub>3</sub> Xylyl), 13.87 (-CH<sub>3</sub>).

IR (ATR, neat, cm<sup>-1</sup>): 2112 (ν<sub>NC</sub>).

MS (MALDI-TOF): m/z calc. for [M] (M = C<sub>93</sub>H<sub>152</sub>NO<sub>7</sub>): 1396.1597; found: 1394.2 [M-2H]. For this compound the MALDI-TOF MS did not afford a concordant exact mass, probably because the compound is not stable in the experimental volatilization conditions.

*Anal.* Calcd. (%) for C<sub>93</sub>H<sub>152</sub>NO<sub>7</sub>: C, 80.00; H, 10.97; N, 1.00; found C, 80.12; H, 11.29; N, 0.97.

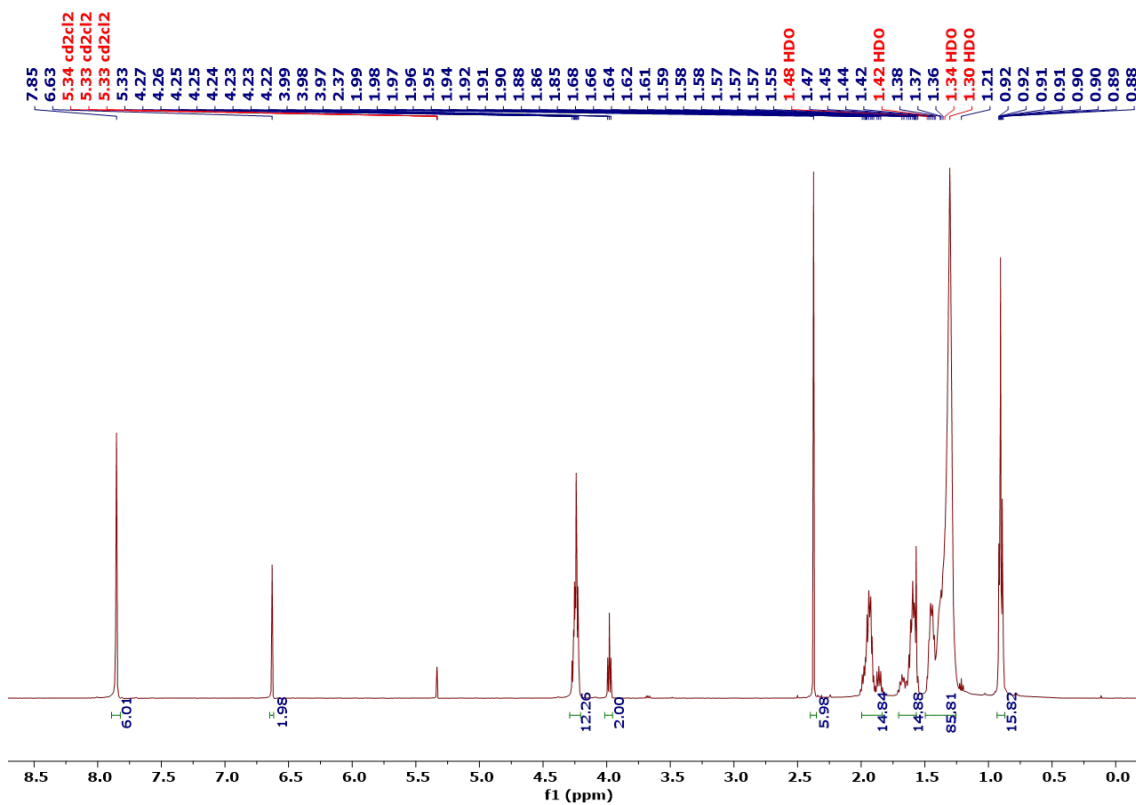

Figure ESI10.  $^1\text{H}$  NMR spectrum of  $\text{L}^{\text{D}2}$  (**6**) at 298 K in  $\text{CD}_2\text{Cl}_2$

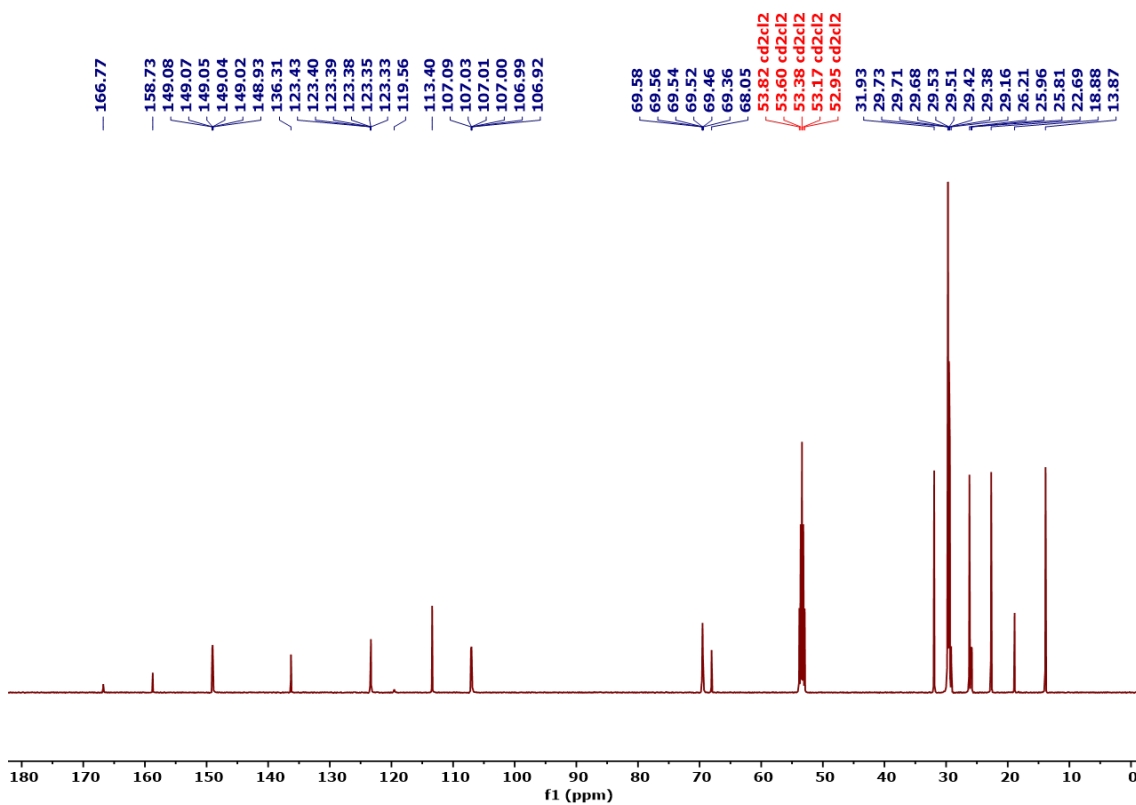

Figure ESI11.  $^{13}\text{C}\{^1\text{H}\}$  NMR spectrum of  $\text{L}^{\text{D}2}$  (**6**) at 298 K in  $\text{CD}_2\text{Cl}_2$

## <sup>1</sup>H comments

### Ligands:

The <sup>1</sup>H NMR spectra are very similar for all the *p*-substituted isocyanides. In ligands **L<sup>A</sup>**, **L<sup>B</sup>** and **L<sup>D1</sup>** they show the expected AA'XX' spin system for the aryl protons of the isocyanide group. An AB<sub>2</sub> spin system is observed for **L<sup>X</sup>**, and a singlet for **L<sup>D2</sup>**. In the case of the *m*-substituted ligand (**L<sup>C</sup>**) a triplet for the *ortho*- and a doublet for the *para*-H atoms, and a broad singlet for the two methoxy groups, are observed. The aryl protons of the triphenylene core display a singlet. For the methylene groups, a multiplet and a triplet are observed in the range 4.2–3.9 ppm, corresponding to the first methylene group of the alkyloxy moieties. The remaining chain hydrogen atoms appear overlapped in the range 1.9–1.3 ppm. Singlets for the Me/MeO groups are also observed.

### Complexes:

In the <sup>1</sup>H NMR spectra of the complexes, the aromatic protons *ortho* to the isocyanide group show a slight deshielding upon coordination to Rh<sup>I</sup>, as reported for other related compounds.<sup>10</sup> The OCH<sub>2</sub> protons appear at *ca.* 4 ppm, and the rest of the alkyl protons are seen in the 1.94–0.88 ppm range.

### TABLE ESI1 and IR comments

Table ESI1. IR ν(C≡N) isocyanide bands (cm<sup>-1</sup>) for free and coordinated isocyanide ligands.

| L / ν <sub>C≡N</sub> free    | ν <sub>C≡N</sub> coordinated |                                         |                                              |
|------------------------------|------------------------------|-----------------------------------------|----------------------------------------------|
|                              | [Rh(L) <sub>4</sub> ](Cl)    | [Rh(L) <sub>4</sub> ](BF <sub>4</sub> ) | [Rh(L) <sub>4</sub> ] [Au(CN) <sub>2</sub> ] |
| <b>L<sup>A</sup></b> / 2125  | 2141                         | 2150                                    | 2142                                         |
| <b>L<sup>B</sup></b> / 2123  | 2139                         | 2140                                    | 2151                                         |
| <b>L<sup>C</sup></b> / 2134  | 2151                         | 2158                                    | 2152                                         |
| <b>L<sup>X</sup></b> / 2109  | 2129*                        | 2129**                                  | 2133**                                       |
| <b>L<sup>D1</sup></b> / 2120 | 2160                         | 2156                                    | 2157                                         |
| <b>L<sup>D2</sup></b> / 2112 | 2134                         | 2139                                    | 2139                                         |

ATR measurements.

\*Data from reference **Error! Bookmark not defined.** of main text.

\*\*Data from reference **Error! Bookmark not defined.** of main text.

The IR spectra of the free ligands show a broad band corresponding to ν(C≡N) in the range 2112–2135 cm<sup>-1</sup>. The solid state IR spectra of all the complexes exhibit stretching ν(C≡N) isocyanide absorptions at higher wavenumbers than in the corresponding free ligands: 40–36 cm<sup>-1</sup> higher for the Rh<sup>I</sup> complexes without methyl groups in *ortho* position and 27–22 cm<sup>-1</sup> higher for the Rh<sup>I</sup> complexes of **L<sup>X</sup>** and **L<sup>D2</sup>**, with methyl groups in *ortho* position (Table 1). All these bands appear in the complexes in the range 2129–2160 cm<sup>-1</sup> and are broad. For this reason, they are likely overlapping the weaker ν(C≡N)<sub>cyanoide</sub> absorptions in the [Rh(L)<sub>4</sub>][Au(CN)<sub>2</sub>] complexes (ν(C≡N) for K[Au(CN)<sub>2</sub>] appears at 2150 cm<sup>-1</sup>). In the absence of independent observation, the similarity of all band positions for all the [Rh(L)<sub>4</sub>](A) complexes might be consistent with a common cation and suggesting that the [Au(CN)<sub>2</sub>]<sup>-</sup> moiety is not involved in formation of Rh···Au···Rh interactions in the solids. Other observations discussed later suggest the same.

## b. Synthesis of the complexes

For the synthesis of  $[\text{Rh}(\text{L})_4](\text{A})$  complexes ( $\text{L} = \text{L}^{\text{A}}\text{-L}^{\text{D2}}$ ;  $\text{A} = \text{Cl}, \text{BF}_4, [\text{Au}(\text{CN})_2]$ ) the same or very similar procedures were used. Therefore, a general description is given and the characterization data for each type of complex are provided.

### i) General procedure for synthesizing $[\text{Rh}(\text{L})]\text{Cl}$ with arylisocyanide ligands $\text{L}^{\text{A}}\text{-L}^{\text{C}}$

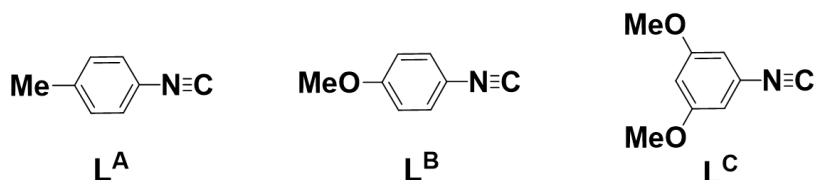

To a solution of  $(\mu\text{-Cl})_2[\text{Rh}(\text{COD})_2]$  in dry dichloromethane a slight excess of the corresponding arylisocyanide (8.2 to 8.5 moles per mol of Rh dimer) was slowly added, and the mixture was stirred at room temperature for 1 hour. Afterwards, the mixture was concentrated to a small volume,  $\text{Et}_2\text{O}$  was added, and the solution was cooled down to  $-22\text{ }^\circ\text{C}$  overnight. The precipitate was filtered, washed with  $\text{Et}_2\text{O}$  ( $3 \times 5\text{ mL}$ ) and vacuum dried.

All the complexes have low solubility in common solvents and decompose after long periods of time in solution. For these reasons  $^{13}\text{C}\{^1\text{H}\}$  NMR spectrum could not be recorded.

#### $[\text{Rh}(\text{L}^{\text{A}})_4]\text{Cl}$ (7) ( $\text{L}^{\text{A}} = p\text{-MeC}_6\text{H}_4(\text{NC})$ )

Reagents:  $[\text{Rh}(\mu\text{-Cl})(\text{COD})_2]$  (50 mg, 0.101 mmol) in  $\text{CH}_2\text{Cl}_2$  (20 mL),  $p\text{-MeC}_6\text{H}_4(\text{NC})$  (97 mg, 0.83 mmol) in  $\text{CH}_2\text{Cl}_2$ . A dark green solid was obtained: 108 mg (88%).

$^1\text{H}$  NMR (499.73 MHz,  $\text{CD}_2\text{Cl}_2$ , 298 K, Figure ESI12)  $\delta$  7.40 (m, 8H,  $\text{H}_o$ ), 7.29 (m, 8H,  $\text{H}_m$ ), 2.42 (s, 12H,  $p\text{-MeC}_6\text{H}_4(\text{NC})$ ).

IR (ATR, neat,  $\text{cm}^{-1}$ ): 2141 ( $\nu_{\text{C}\equiv\text{N}}$ ).

MS (MALDI-TOF):  $m/z$  Calcd. for  $[\text{M}^+(\text{Cl})^-]$  ( $\text{M}^+ = \text{C}_{32}\text{H}_{28}\text{N}_4\text{Rh}$ ): 571.1364; found: 571.1392.

*Anal.* Calcd. for  $\text{C}_{32}\text{H}_{28}\text{ClN}_4\text{Rh}$ : C, 63.32; H, 4.65; N, 9.23; found: C, 62.98; H, 4.51; N, 8.83.



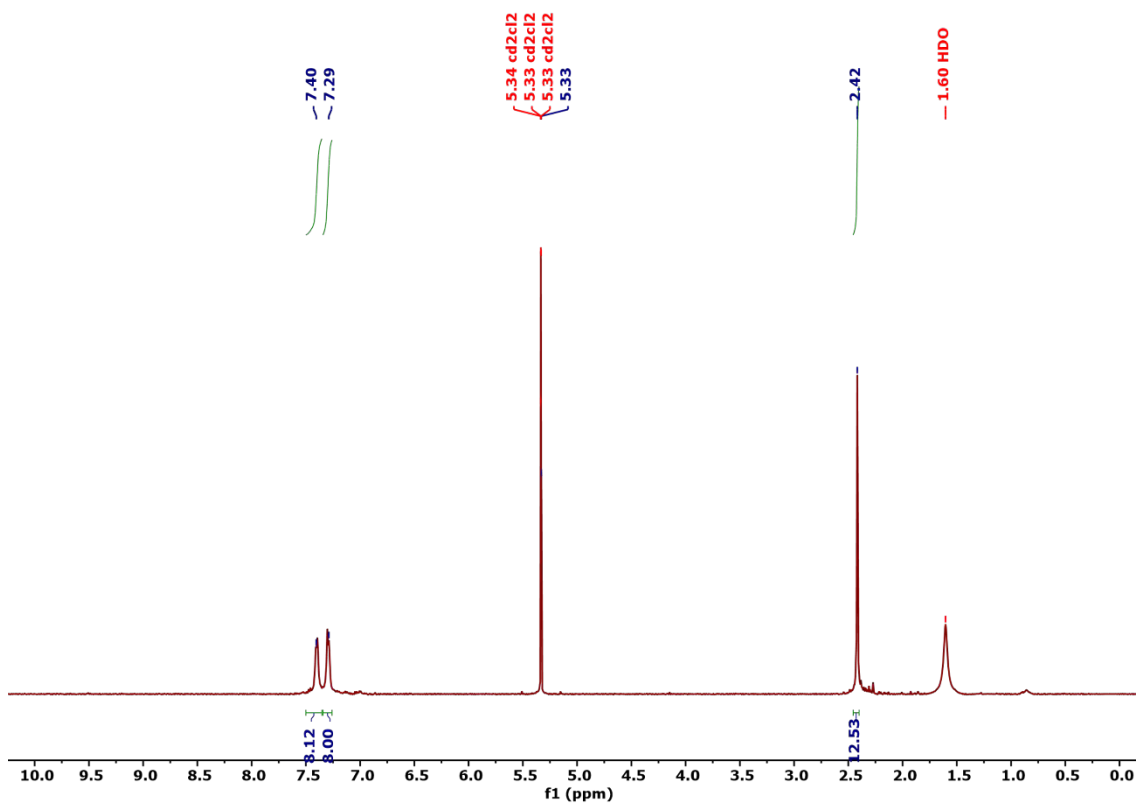

Figure ESI12.  $^1\text{H}$  NMR spectrum of **7** at 298 K in  $\text{CD}_2\text{Cl}_2$

**$[\text{Rh}(\text{L}^{\text{B}})_4]\text{Cl}$  (**8**)** ( $\text{L}^{\text{B}} = p\text{-MeOC}_6\text{H}_4(\text{NC})$ )

Reagents:  $[\text{Rh}(\mu\text{-Cl})(\text{COD})_2]$  (50 mg, 0.101 mmol) in  $\text{CH}_2\text{Cl}_2$  (20 mL),  $p\text{-MeOC}_6\text{H}_4(\text{NC})$  (115 mg, 0.862 mmol) in  $\text{CH}_2\text{Cl}_2$ . A dark green solid was obtained: 111 mg (82%).

$^1\text{H}$  NMR (499.72 MHz,  $\text{CDCl}_3$ , 298 K, Figure ESI13)  $\delta$  7.43 (m, 8H,  $\text{H}_o$ ), 6.93 (m, 8H,  $\text{H}_m$ ), 3.84 (s, 12H,  $p\text{-MeOC}_6\text{H}_4(\text{NC})$ ).

IR (ATR, neat,  $\text{cm}^{-1}$ ): 2139 ( $\nu_{\text{C}\equiv\text{N}}$ ).

MS (MALDI-TOF):  $m/z$ : Calcd. for  $[\text{M}^+(\text{Cl})^-]$  ( $\text{M}^+ = \text{C}_{32}\text{H}_{28}\text{N}_4\text{O}_4\text{Rh}$ ): 635.1160; found: 635.1169

*Anal.* Calcd. for  $\text{C}_{32}\text{H}_{28}\text{ClN}_4\text{O}_4\text{Rh}$ : C, 57.28; H, 4.21; N, 8.35; found: C, 56.92; H, 3.93; N, 7.98.

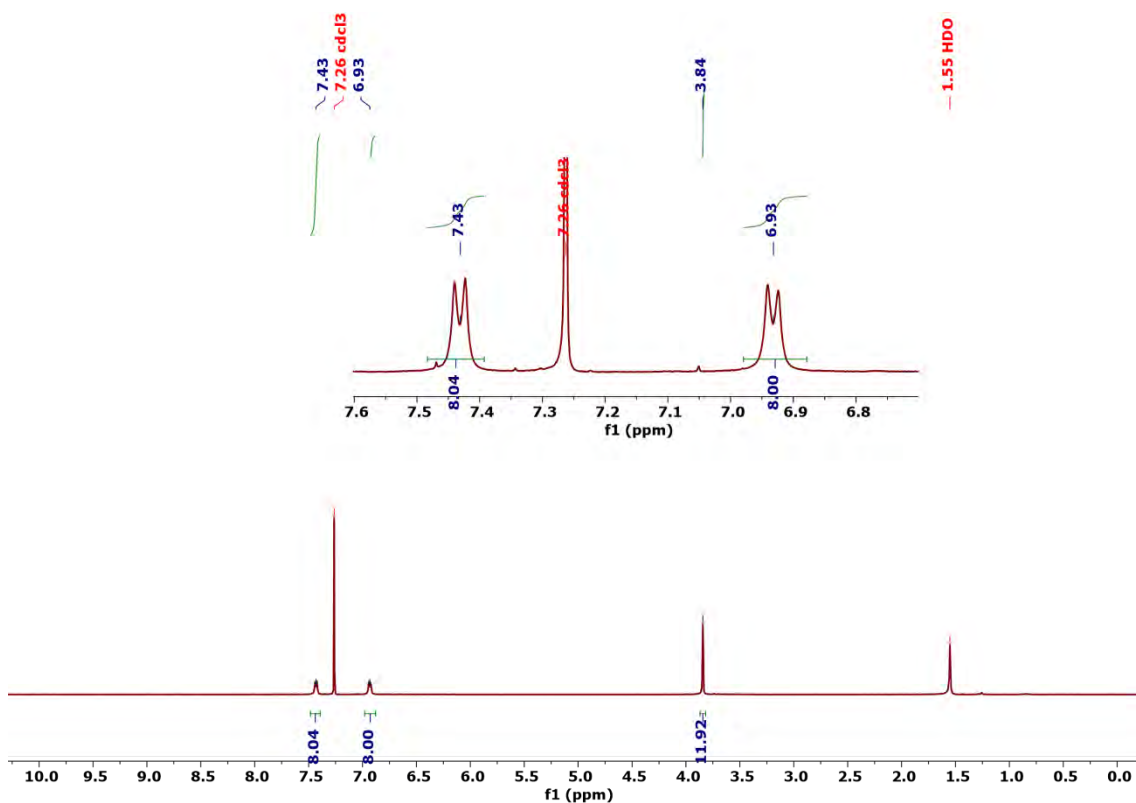

**Figure ESI13.**  $^1\text{H}$  NMR spectrum of **8** at 298 K in  $\text{CDCl}_3$

**$[\text{Rh}(\text{L}^{\text{C}})_4]\text{Cl}$  (**9**) ( $\text{L}^{\text{C}} = 3,5\text{-(OMe)}_2\text{C}_6\text{H}_3(\text{NC})$ )**

Reagents:  $(\mu\text{-Cl})_2[\text{Rh}(\text{COD})]_2$  (60 mg, 0.122 mmol) in  $\text{CH}_2\text{Cl}_2$  (20 mL), 3,5-(OMe) $_2\text{C}_6\text{H}_3(\text{NC})$ , (164 mg, 0.998 mmol) in  $\text{CH}_2\text{Cl}_2$ . An intense blue solid was obtained: 156 mg (81%).

Single crystals of  $[\text{Rh}(\text{L}^{\text{C}})_4]\text{Cl}$  were obtained by slow diffusion of hexane into a solution of the complex  $\text{CH}_2\text{Cl}_2$ . All crystallographic data are summarized in the section of X-ray refinement.

$^1\text{H}$  NMR (499.72 MHz,  $\text{CDCl}_3$ , 298 K, Figure ESI14):  $\delta$  6.65 (d,  $J = 2.2$  Hz, 8H,  $H_o$ ), 6.51 (t,  $J = 2.2$  Hz, 4H,  $H_p$ ); 3.79 (s, 24H,  $\text{OCH}_3$ ).

IR (ATR, neat,  $\text{cm}^{-1}$ ): 2151 ( $\nu_{\text{C}=\text{N}}$ ).

MS (MALDI-TOF):  $m/z$  Calcd. for  $[\text{M}^+(\text{Cl})^-]$  ( $\text{M}^+ = \text{C}_{36}\text{H}_{36}\text{N}_4\text{O}_8\text{Rh}$ ): 755.1583; found: 755.1585.

*Anal.* Calcd. for  $\text{C}_{36}\text{H}_{36}\text{ClN}_4\text{O}_8\text{Rh}$ : C, 54.66; H, 4.59; N, 7.08; found: C, 54.39; H, 4.57; N, 6.85.

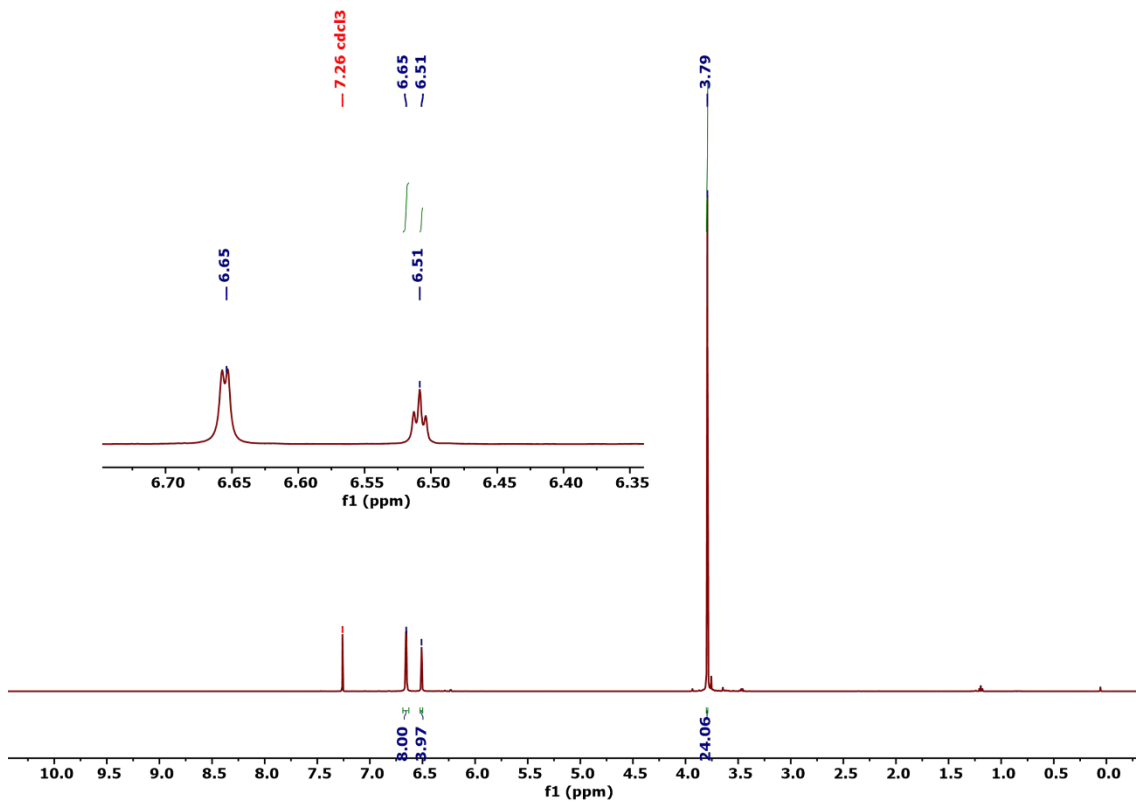

Figure ESI14.  $^1\text{H}$  NMR spectra of **9** at 298 K in  $\text{CDCl}_3$

**ii) General procedure for the synthesis of [Rh(L<sub>n</sub>)](BF<sub>4</sub>) with arylisocyanide ligands L<sup>A</sup>-L<sup>C</sup>.**

4.1 moles of the corresponding arylisocyanide per Rh atom were slowly added in dry dichloromethane to a solution of [Rh(COD)<sub>2</sub>](BF<sub>4</sub>) in dry dichloromethane and the mixture was stirred at room temperature for 1 hour. Afterwards, it was concentrated by evaporation at reduced pressure and then Et<sub>2</sub>O was added and cooled at -22 °C overnight. The precipitate was filtered, washed with Et<sub>2</sub>O (3 × 5 mL) and vacuum dried.

**[Rh(L<sup>A</sup>)<sub>4</sub>](BF<sub>4</sub>) (11)**

Reagents: [Rh(COD)<sub>2</sub>](BF<sub>4</sub>) (60 mg, 0.148 mmol) in CH<sub>2</sub>Cl<sub>2</sub> (20 mL), *p*-MeC<sub>6</sub>H<sub>4</sub>(NC) (0.099 g, 0.606 mmol) in CH<sub>2</sub>Cl<sub>2</sub> (15 mL). A green solid was obtained: 67 mg (69%).

Single crystals of [Rh(L<sup>A</sup>)<sub>4</sub>](BF<sub>4</sub>) were obtained by slow diffusion of hexane into a solution of the complex in acetone. All crystallographic data are summarized in the section of X-ray refinement.

<sup>1</sup>H NMR (400.15 MHz, CDCl<sub>3</sub>, 298 K, Figure ESI15) δ 7.39 (m, 8H, H<sub>o</sub>), 7.25 (m, 8H, H<sub>m</sub>), 2.39 (s, 12H, *p*-MeC<sub>6</sub>H<sub>4</sub>(NC)).

<sup>19</sup>F NMR (376.47 MHz, CDCl<sub>3</sub>, 298 K, Figure ESI16) δ -153.75 (s, 4F, <sup>10</sup>BF<sub>4</sub><sup>-</sup>) -153.81 (s, 4F, <sup>11</sup>BF<sub>4</sub><sup>-</sup>).

IR (ATR, neat, cm<sup>-1</sup>): 2150 (ν<sub>C≡N</sub>), 1030 (ν<sup>10</sup><sub>BF<sub>4</sub><sup>-</sup></sub>), 1012 (ν<sup>11</sup><sub>BF<sub>4</sub><sup>-</sup></sub>).

MS (MALDI-TOF): m/z Calcd. for [M<sup>+</sup>-(BF<sub>4</sub>)<sup>-</sup>] (M<sup>+</sup> = C<sub>32</sub>H<sub>28</sub>N<sub>4</sub>Rh): 571.1364; found: 571.1344.

*Anal.* Calcd. for C<sub>32</sub>H<sub>28</sub>BF<sub>4</sub>N<sub>4</sub>Rh: C, 58.38; H, 4.29; N, 8.51; found: C, 58.13; H, 4.09; N, 8.32.

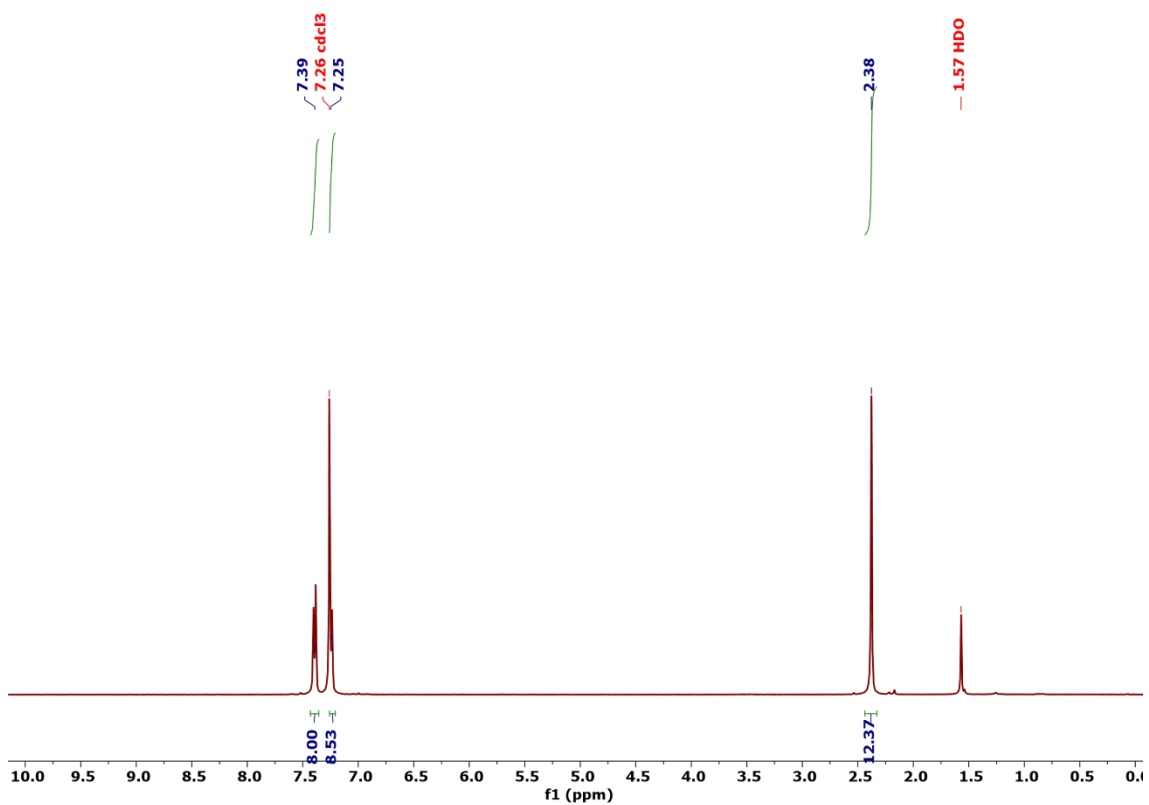

Figure ESI15.  $^1\text{H}$  NMR spectrum of **11** at 298 K in  $\text{CDCl}_3$ .

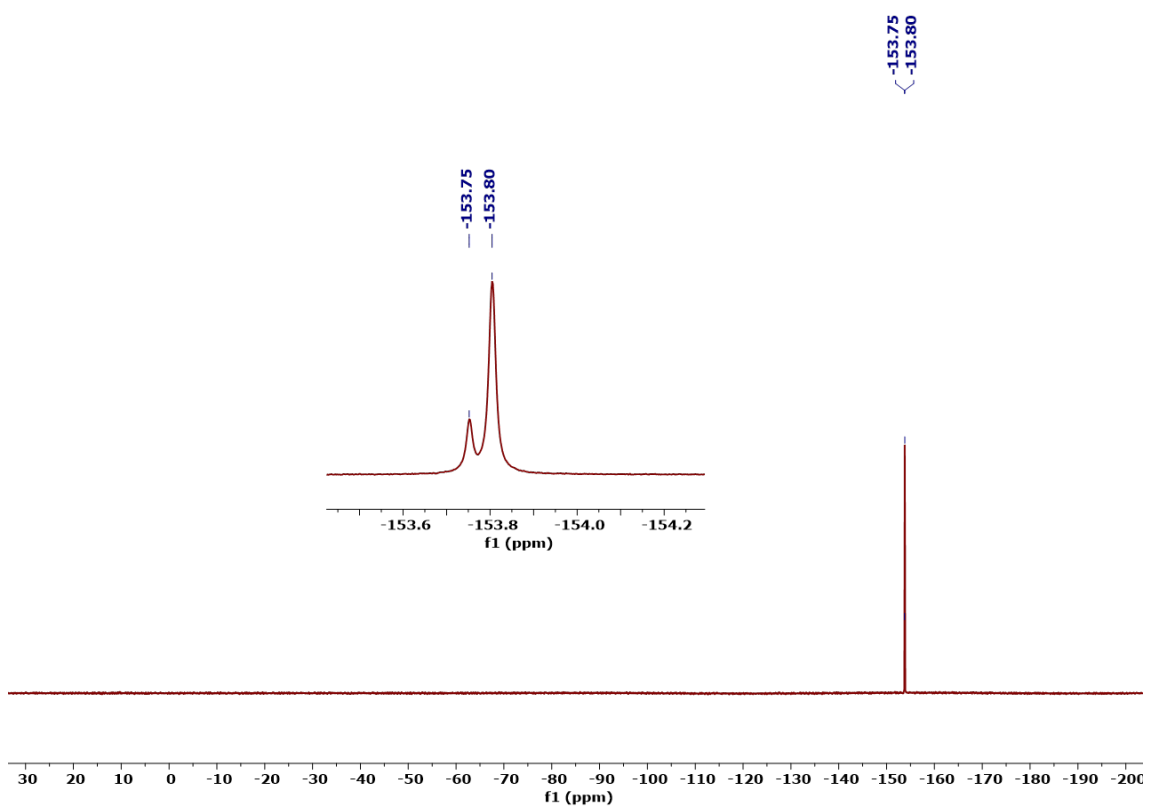

Figure ESI16.  $^{19}\text{F}$  NMR spectra of **11** at 298 K in  $\text{CDCl}_3$ .

### [Rh(L<sup>B</sup>)<sub>4</sub>](BF<sub>4</sub>) (**12**)

Reagents: [Rh(COD)<sub>2</sub>](BF<sub>4</sub>) (94 mg, 0.23 mmol) in CH<sub>2</sub>Cl<sub>2</sub> (20 mL), CNC<sub>6</sub>H<sub>4</sub>OMe-*p* (124 mg, 0.93 mmol) in CH<sub>2</sub>Cl<sub>2</sub> (15 mL). A color change of the solution was observed, from red to greenish-brown. A greenish-brown solid was obtained: 150 mg (90 %).

<sup>1</sup>H NMR (499.72 MHz, CDCl<sub>3</sub> 298 K, Figure ESI17): δ 7.39 (m, 8H, *H<sub>o</sub>*), 6.90 (m, 8H, *H<sub>m</sub>*); 3.83 (s, 12H, *OCH<sub>3</sub>*).

<sup>19</sup>F NMR (470.15 MHz, CDCl<sub>3</sub> 298 K, Figure ESI18): δ -152.96 (s<sub>broad</sub>, <sup>10</sup>BF<sub>4</sub> and <sup>11</sup>BF<sub>4</sub>).

IR (ATR, neat, cm<sup>-1</sup>): 2140 (ν<sub>C≡N</sub>), 1015 (ν<sup>10</sup><sub>BF<sub>4</sub>-</sub>), 1000 (ν<sup>11</sup><sub>BF<sub>4</sub>-</sub>).

MS (MALDI-TOF): *m/z*: Calcd. for [*M*<sup>+</sup>-BF<sub>4</sub><sup>-</sup>] (*M*<sup>+</sup> = C<sub>32</sub>H<sub>28</sub>N<sub>4</sub>O<sub>4</sub>Rh<sup>+</sup>): 635.1160; found: 635.1169.

*Anal.* Calcd. for C<sub>32</sub>H<sub>28</sub>BF<sub>4</sub>N<sub>4</sub>O<sub>4</sub>Rh: C, 53.21; H, 3.91; N, 7.76; found C, 53.32; H, 3.88; N, 7.48.

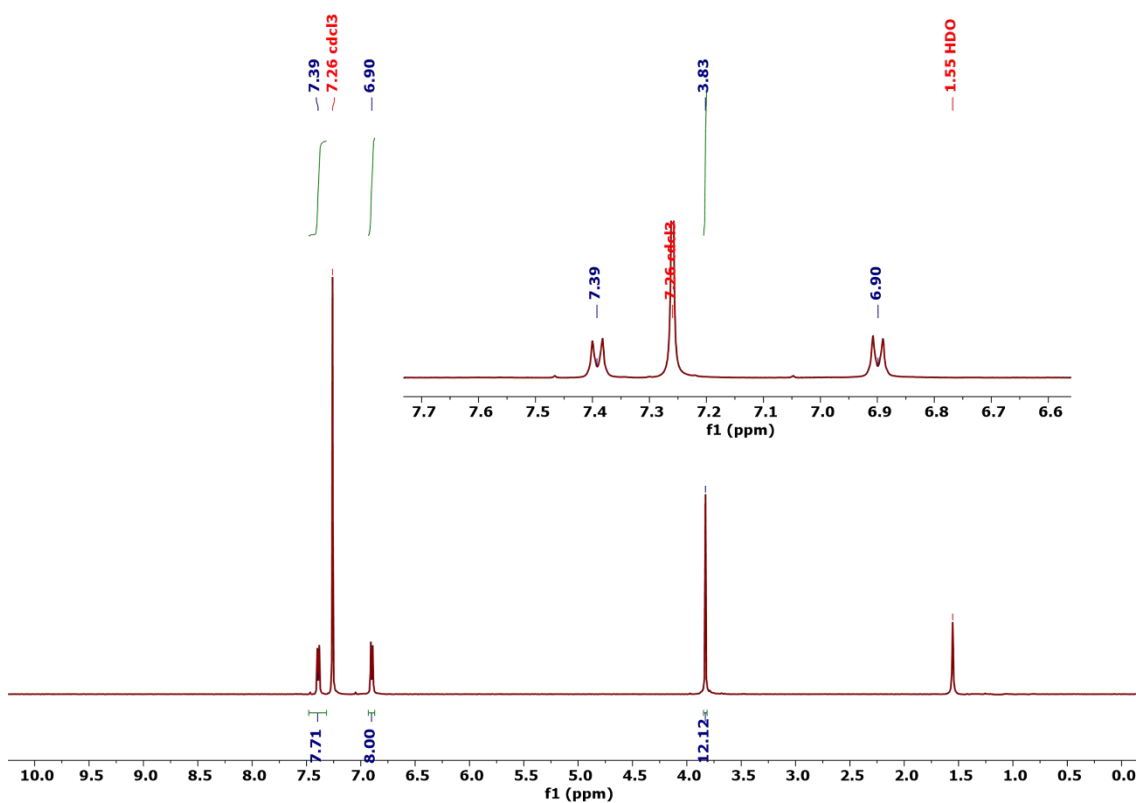

Figure ESI17. <sup>1</sup>H NMR spectrum of **12** at 298 K in CDCl<sub>3</sub>

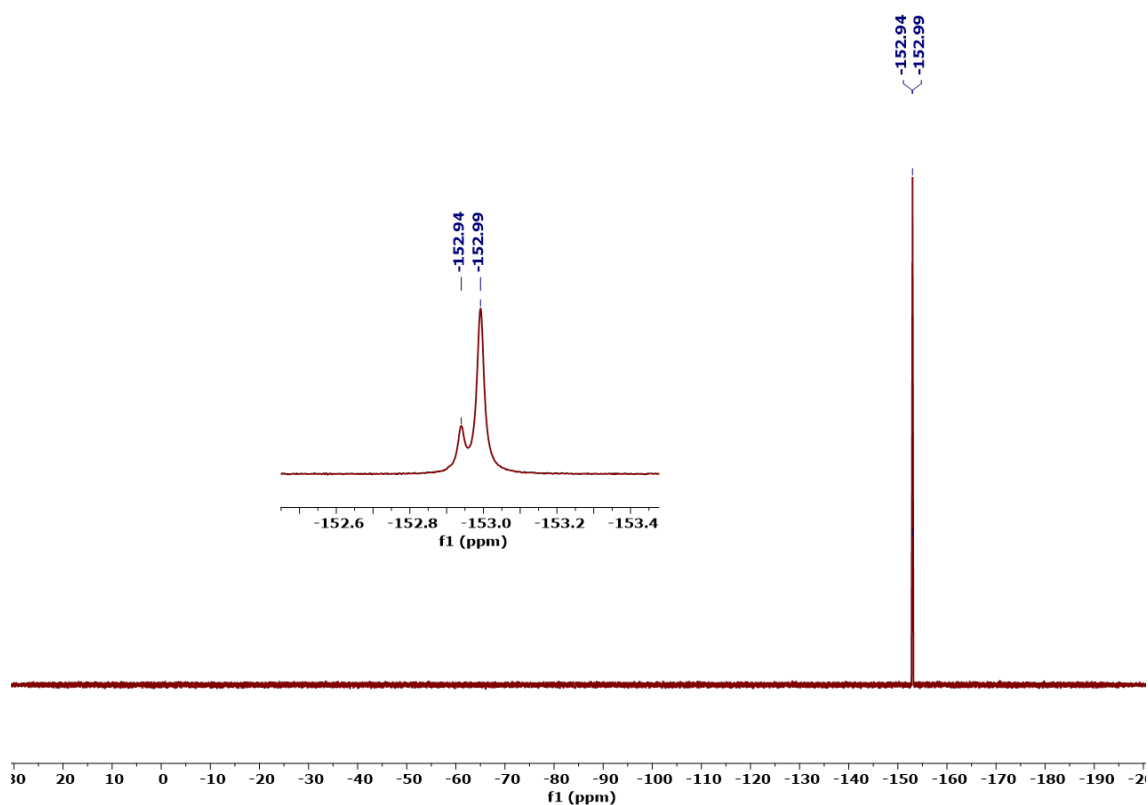

Figure ESI18.  $^{19}\text{F}$  NMR spectrum of **12** at 298 K in  $\text{CDCl}_3$

**$[\text{Rh}(\text{L}^{\text{C}})_4](\text{BF}_4)$  (**13**)**

Reagents:  $[\text{Rh}(\text{COD})_2](\text{BF}_4)$  (60 mg, 0.148 mmol) in  $\text{CH}_2\text{Cl}_2$  (20 mL), 3,5-(OMe) $_2\text{C}_6\text{H}_3(\text{NC})$  (0.099 g, 0.606 mmol) in  $\text{CH}_2\text{Cl}_2$ . A color change of the solution was observed, from red to dark green. A dark green solid was obtained: 110 mg (89%).

$^1\text{H}$  NMR (499.72 MHz, acetone- $d_6$ , 298 K, Figure ESI19):  $\delta$  6.90 (d,  $J=2.2$  Hz, 8H,  $H_o$ ), 6.73 (t,  $J=2.2$  Hz, 4H,  $H_p$ ); 3.86 (s, 24H,  $\text{OCH}_3$ ).

$^{19}\text{F}$  NMR (470.17 MHz, acetone- $d_6$ , 298 K, Figure ESI20):  $\delta$  -151.89 (a, 4F,  $\text{BF}_4^-$ ).

IR (ATR, neat,  $\text{cm}^{-1}$ ): 2158 ( $\nu_{\text{C}\equiv\text{N}}$ ), 1051 ( $\nu_{\text{BF}_4^-}^{10}$ ), 1032 ( $\nu_{\text{BF}_4^-}^{11}$ ).

MS (MALDI-TOF):  $m/z$  Calcd. for  $[\text{M}^+(\text{BF}_4)]^+$  ( $\text{M}^+ = \text{C}_{36}\text{H}_{36}\text{N}_4\text{O}_8\text{Rh}$ ): 755.1583; found: 755.1591.

*Anal.* Calcd. for  $\text{C}_{36}\text{H}_{36}\text{BF}_4\text{N}_4\text{O}_8\text{Rh}$ : C, 51.33; H, 4.31; N, 6.65; found: C, 51.24; H, 4.12; N, 6.51.

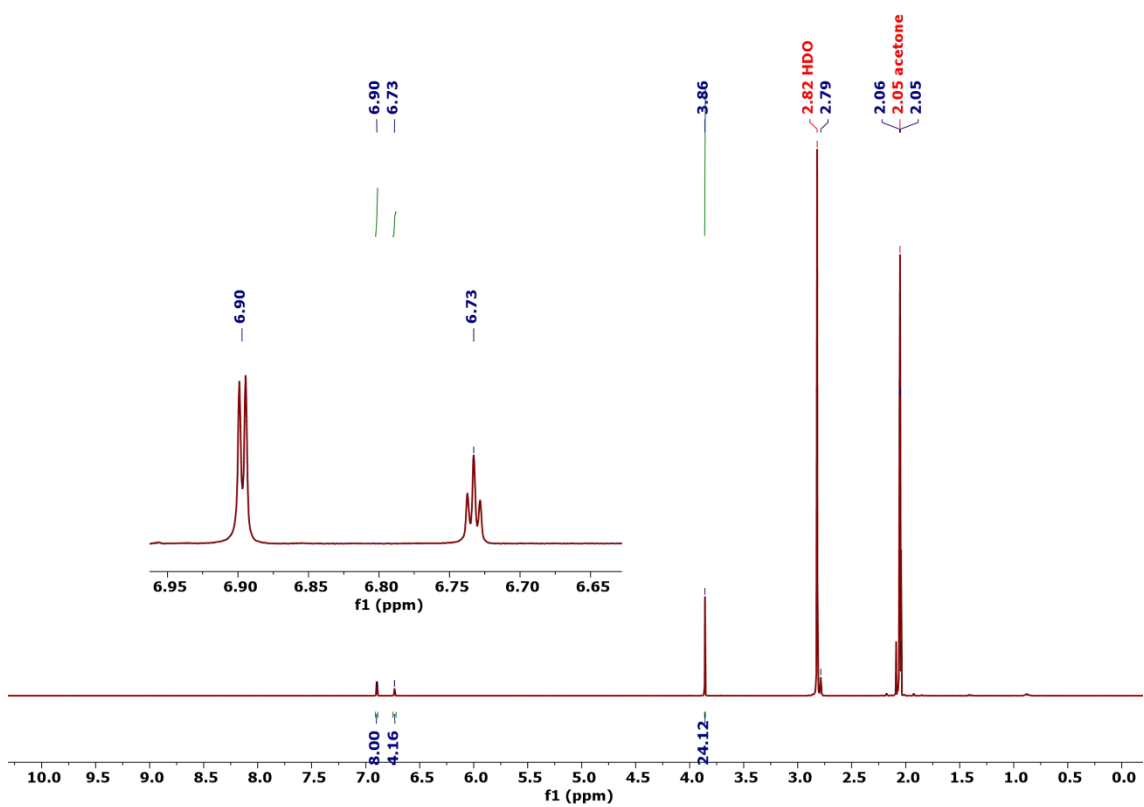

Figure ESI19.  $^1\text{H}$  NMR spectrum of **13** at 298 K in acetone- $d_6$

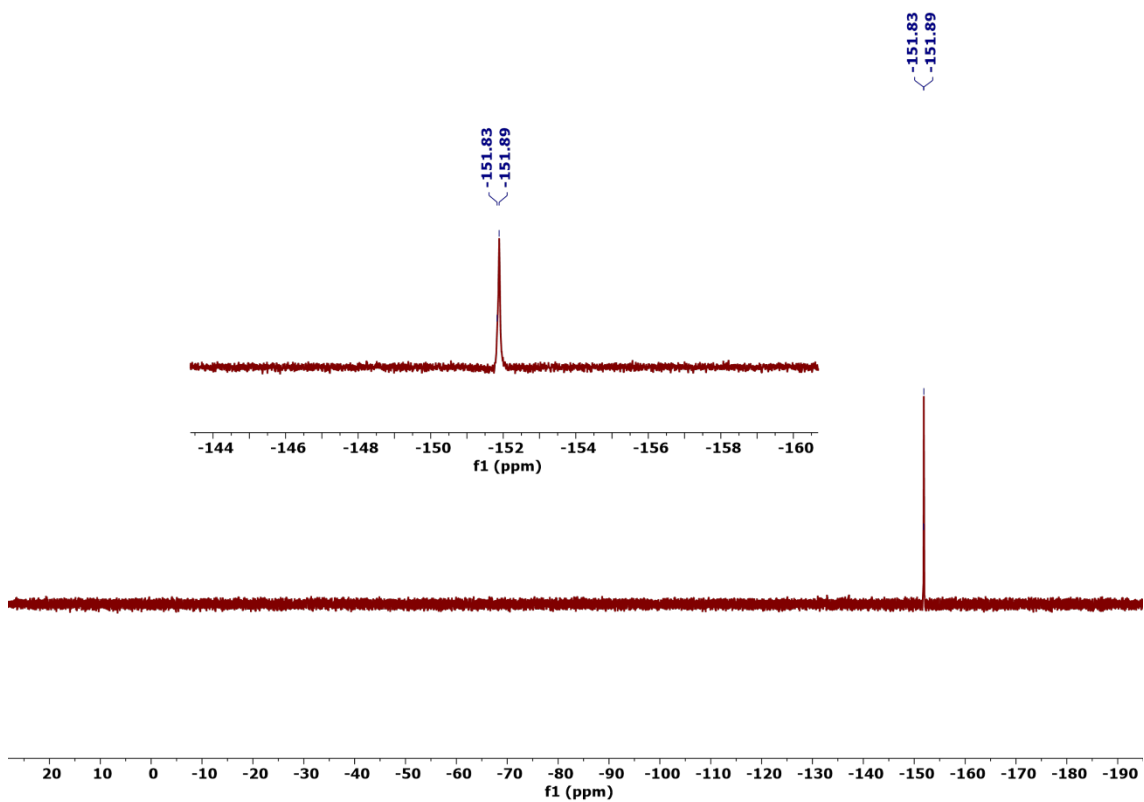

Figure ESI20.  $^{19}\text{F}$  NMR spectrum of **13** at 298 K in acetone- $d_6$



### iii) General procedure for the synthesis of $[\text{Rh}(\text{L})][\text{Au}(\text{CN})_2]$ with arylisocyanides $\text{L}^{\text{A}}\text{-L}^{\text{C}}$

Potassium dicyanoaurate (I) (1.2 equivalents are used in the reaction) was dissolved in acetone, and a solution of the corresponding a  $[\text{Rh}(\text{L})_4](\text{BF}_4)$  complex in dichloromethane was added drop by drop. The mixture was stirred for 3 hours at 40 °C. In the case of  $\text{L}^{\text{A}}$  or  $\text{L}^{\text{B}}$ , the product was extracted with dichloromethane and recrystallized; in the case of  $\text{L}^{\text{C}}$ , the solvent was evaporated to dryness, washed with water, dried, and recrystallized from dichloromethane.

#### $[\text{Rh}(\text{L}^{\text{A}})_4][\text{Au}(\text{CN})_2]$ (**16**)

Reagents:  $[\text{Rh}(\text{L}^{\text{A}})_4](\text{BF}_4)$  (20 mg, 0.030 mmol) in  $\text{CH}_2\text{Cl}_2$  (40 mL),  $\text{K}[\text{Au}(\text{CN})_2]$  (10 mg, 0.033 mmol) in acetone/ $\text{H}_2\text{O}$  (5 mL/3 mL). A green solid was obtained: 20 mg (30%).

$^1\text{H}$  RMN (499.73 MHz, acetone- $d_6$ , 298 K, Figure ESI21):  $\delta$  7.63 (m, 8H,  $\text{H}_o$ ), 7.40 (m, 8H,  $\text{H}_m$ ), 2.42 (s, 12H,  $\text{CNC}_6\text{H}_4\text{Me-p}$ ).

IR (ATR):  $2142\text{ cm}^{-1}$  ( $\nu_{\text{C}\equiv\text{N}}$  isocyanide).

MS (MALDI-TOF):  $m/z$  Calcd. for  $[\text{M}^+-(\text{Au}(\text{CN})_2)^-]$  ( $\text{M}^+ = \text{C}_{32}\text{H}_{28}\text{N}_4\text{Rh}$ ): 571.1364; found: 571.1385.

Anal. Calcd. for  $\text{C}_{34}\text{H}_{28}\text{AuN}_6\text{Rh}$ : C, 49.77; H, 3.44; N, 10.24; found: C, 49.54; H, 3.22; N, 10.05.

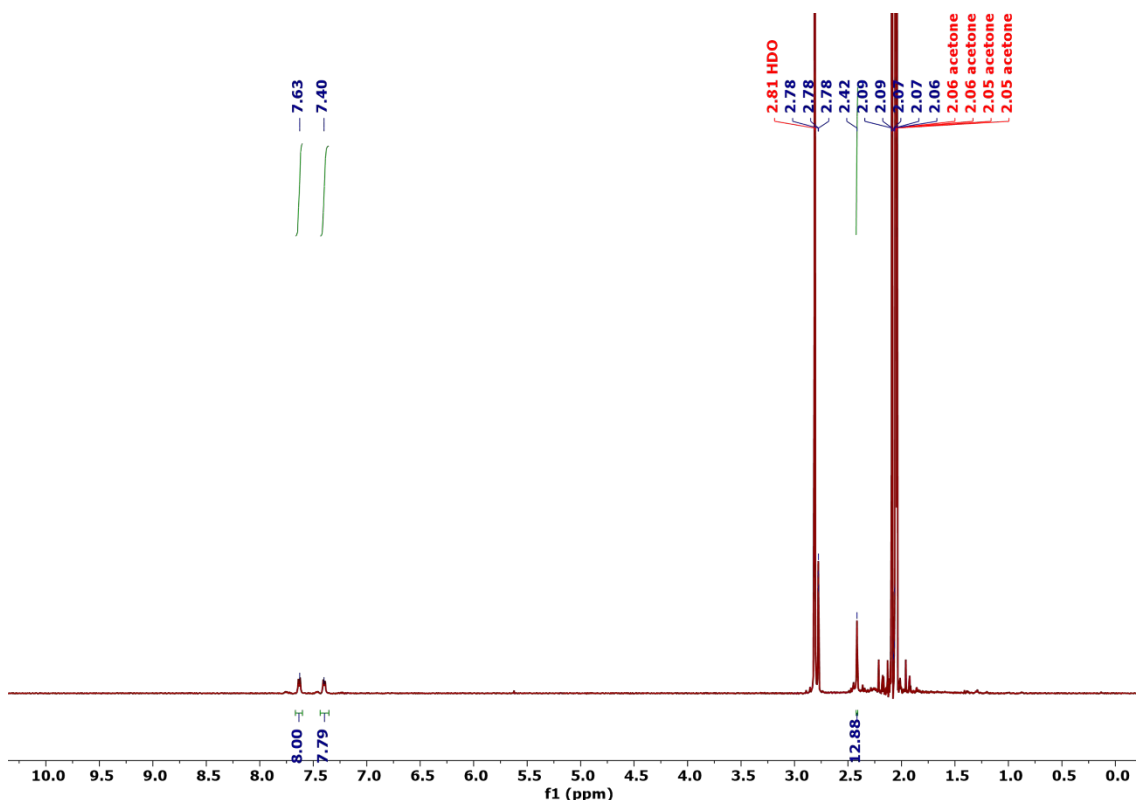

Figure ESI21.  $^1\text{H}$  NMR spectrum of **16** at 298 K in acetone- $d_6$

**[Rh(L<sup>B</sup>)<sub>4</sub>][Au(CN)<sub>2</sub>] (17)**

Reagents: [Rh(L<sup>B</sup>)<sub>4</sub>](BF<sub>4</sub>) (20 mg, 0.028 mmol) in CH<sub>2</sub>Cl<sub>2</sub> (40 mL), K[Au(CN)<sub>2</sub>] (9 mg, 0.031 mmol) in acetone (5 mL). A blue-greenish solid was obtained: 24 mg (98%).

<sup>1</sup>H RMN (499.73 MHz, acetone-*d*<sub>6</sub>, 298 K, Figure ESI22): δ 7.69 (m, 8H, H<sub>o</sub>), 7.10 (m, 8H, H<sub>m</sub>), 3.89 (s, 12H, CNC<sub>6</sub>H<sub>4</sub>OMe-*p*).

IR (ATR): 2151 cm<sup>-1</sup> (ν<sub>C≡N</sub> isocyanide).

MS (MALDI-TOF): *m/z*: Calcd. for [M<sup>+</sup>-(Au(CN)<sub>2</sub>)<sup>-</sup>] (M<sup>+</sup> = C<sub>32</sub>H<sub>28</sub>N<sub>4</sub>O<sub>4</sub>Rh): 635.1160; found: 635.1183.

*Anal.* Calcd. for C<sub>34</sub>H<sub>28</sub>AuN<sub>6</sub>O<sub>4</sub>Rh·1 CH<sub>2</sub>Cl<sub>2</sub>: C, 43.36; H, 3.12; N, 8.67; found: C, 43.70; H, 2.93; N, 8.49.

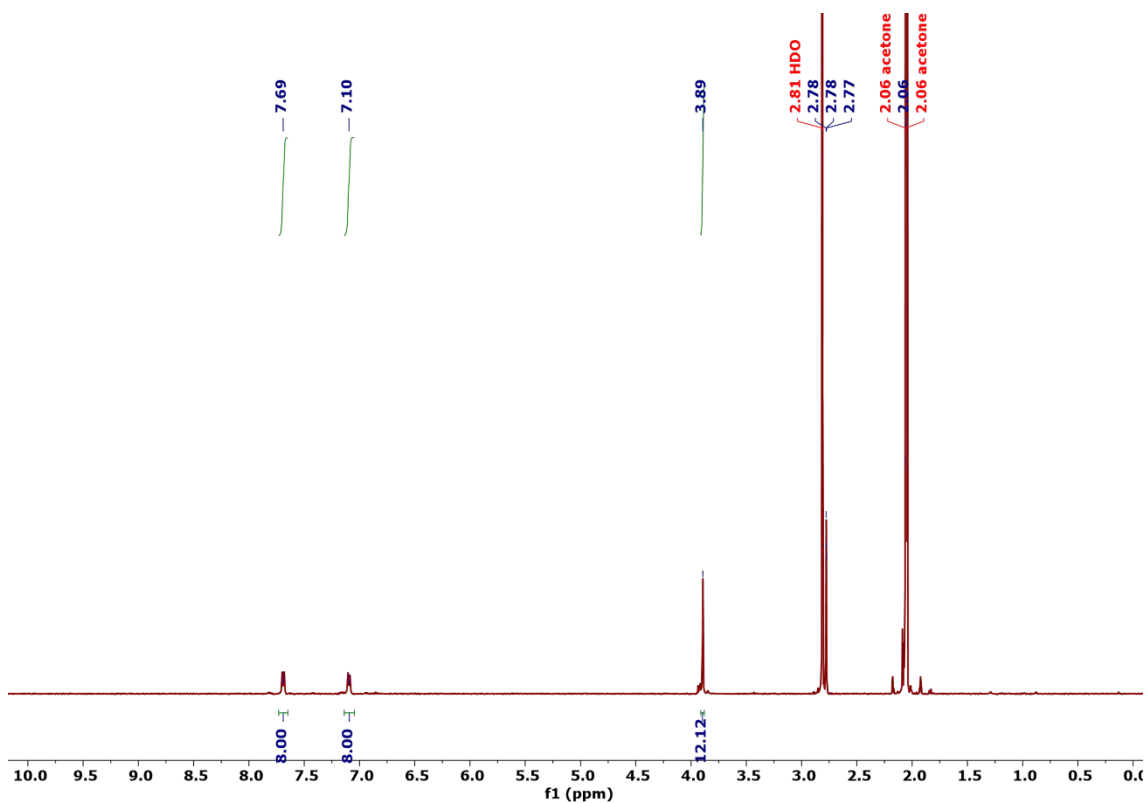

**Figure ESI22.** <sup>1</sup>H NMR spectrum of **17** at 298 K in acetone-*d*<sub>6</sub>

**[Rh(L<sup>C</sup>)<sub>4</sub>][Au(CN)<sub>2</sub>] (18)**

Reagents: [Rh(L<sup>C</sup>)<sub>4</sub>](BF<sub>4</sub>) (20 mg, 0.024 mmol) in CH<sub>2</sub>Cl<sub>2</sub> (40 mL), K[Au(CN)<sub>2</sub>] (0.026 mmol) in acetone (5 mL). A dark green solid was obtained: 21 mg (87%).

<sup>1</sup>H RMN (499.73 MHz, CD<sub>2</sub>Cl<sub>2</sub>, 298 K, Figure ESI23): δ 6.75 (m, 8H, H<sub>o</sub>), 6.59 (m, 4H, H<sub>p</sub>), 3.81 (s, 24H, OCH<sub>3</sub>).

IR (ATR): 2132 cm<sup>-1</sup> (ν<sub>C≡N</sub> isocyanide).

MS (MALDI-TOF): m/z Calcd. for [M<sup>+</sup>-(Au(CN)<sub>2</sub>)<sup>-</sup>]<sup>+</sup> (M<sup>+</sup> = C<sub>36</sub>H<sub>36</sub>N<sub>4</sub>O<sub>8</sub>Rh): 755.1583; found: 755.1604.

Anal. Calcd. for C<sub>38</sub>H<sub>36</sub>AuN<sub>6</sub>O<sub>8</sub>Rh: C, 57.22; H, 4.80; N, 7.41; found: C, 56.94; H, 4.62; N, 7.28.

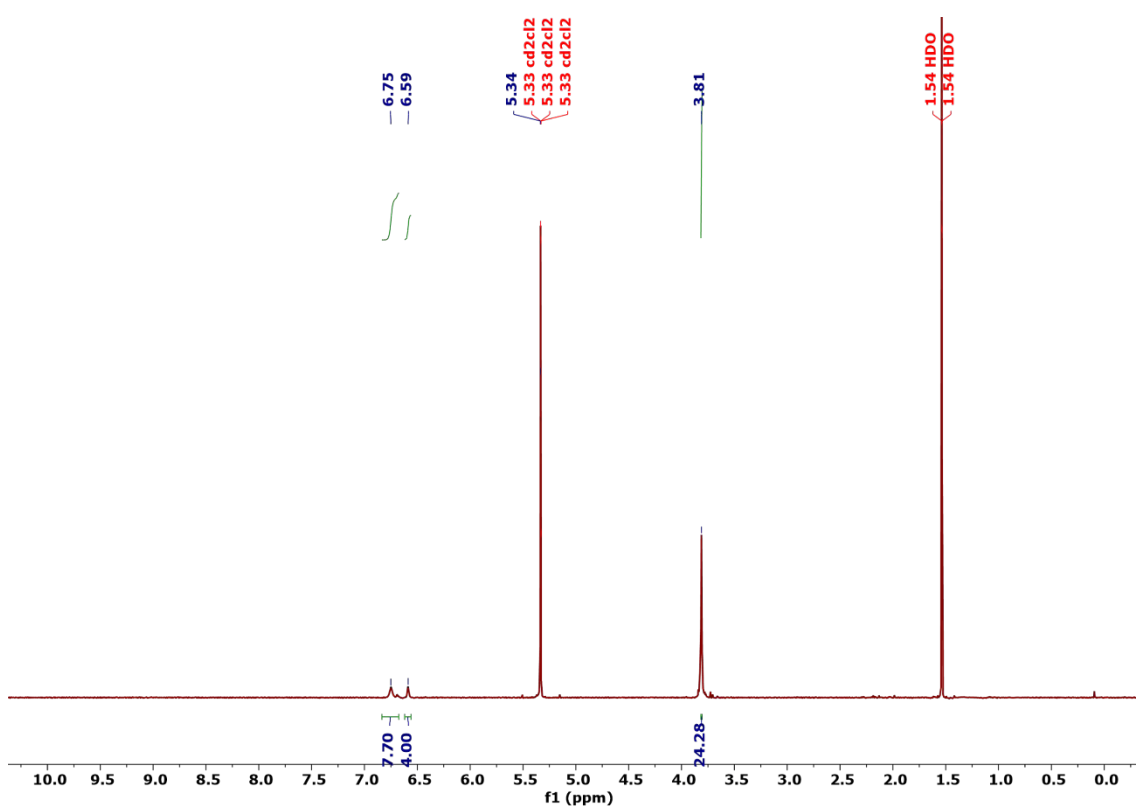

**Figure ESI23.** <sup>1</sup>H NMR spectrum of **18** at 298 K in CD<sub>2</sub>Cl<sub>2</sub>

### [Rh(L<sup>D1</sup>)<sub>4</sub>]Cl (10)

A solution of L<sup>D1</sup> ligand (85 mg, 0.062 mmol) in 10 mL dry CH<sub>2</sub>Cl<sub>2</sub> was slowly added into a solution of (μ-Cl)<sub>2</sub>[RhCOD]<sub>2</sub> in 20 mL of dry CH<sub>2</sub>Cl<sub>2</sub> and the mixture was stirred for 1 h. at room temperature. Afterwards, the solution was concentrated by evaporation under reduced pressure, and CH<sub>3</sub>CN was added and cooled down at -22 °C 1 overnight. The green solid was filtered, washed with CH<sub>3</sub>CN (3 × 5 mL), and dried in vacuum. A dark green solid was obtained: 80 mg (92%).

<sup>1</sup>H NMR (499.72 MHz, CD<sub>2</sub>Cl<sub>2</sub> 298 K, Figure ESI24): δ 7.84 (s, 24H, Ar-*H*), 7.41 (d, J = 8.11 Hz, 8H, Ar-*H*), 6.95 (d, J = 8.11, 8H, Ar-*H*). 4.26-4.21 (m, 48H, O-CH<sub>2</sub>), 4.04 (t, J = 6.2 Hz, 8H, O-CH<sub>2</sub>) 1.97-1.85 (m, 56H, O-CH<sub>2</sub>-CH<sub>2</sub>), 1.72-1.61 (m, 56H, O-CH<sub>2</sub>-CH<sub>2</sub>-CH<sub>2</sub>), 1.48-1.25 (m, 320H, (CH<sub>2</sub>)<sub>n</sub>), 0.90-0.86 (m, 60H, CH<sub>3</sub>).

<sup>13</sup>C{<sup>1</sup>H} NMR (125.67 MHz, CD<sub>2</sub>Cl<sub>2</sub> 298 K, Figure ESI25): δ (CN not observed), 160.58 (OC<sub>Ph</sub>), 149.12, 149.06, 148.98, 148.88 (O-C<sub>TriPh</sub>), 128.08 (H-C<sub>Ph</sub>), 123.51, 123.46, 123.40, 123.30, 123.27, 123.21 (C<sub>TriPh</sub>), 118.43 (N-C<sub>Ph</sub>), 115.43 (H-C<sub>Ph</sub>), 107.23, 107.09, 107.07, 106.99, 106.93, 106.90 (H-C<sub>TriPh</sub>), 69.66, 69.58, 69.52, 69.47, 69.42, 69.35, 68.66 (O-CH<sub>2</sub>), 31.91, 29.71, 29.69, 29.66, 29.51, 29.44, 29.36, 29.06, 26.20, 25.98, 25.81, 22.67 (-CH<sub>2</sub>-), 13.86 (-CH<sub>3</sub>).

IR (ATR, neat, cm<sup>-1</sup>): 2160 (ν<sub>NC-Rh</sub>).

MS (MALDI-TOF): m/z calc. for [(M<sup>+</sup>/2-(Cl<sup>-</sup>))] (M<sup>+</sup>/2 = C<sub>182</sub>H<sub>294</sub>N<sub>2</sub>O<sub>14</sub>Rh): 2837.1472; found 2837.1435.

*Anal.* Calcd. (%) for C<sub>364</sub>H<sub>588</sub>ClN<sub>4</sub>O<sub>28</sub>Rh: C, 77.97; H, 10.57; N, 1.00; found C, 77.91; H, 10.50; N, 1.02.

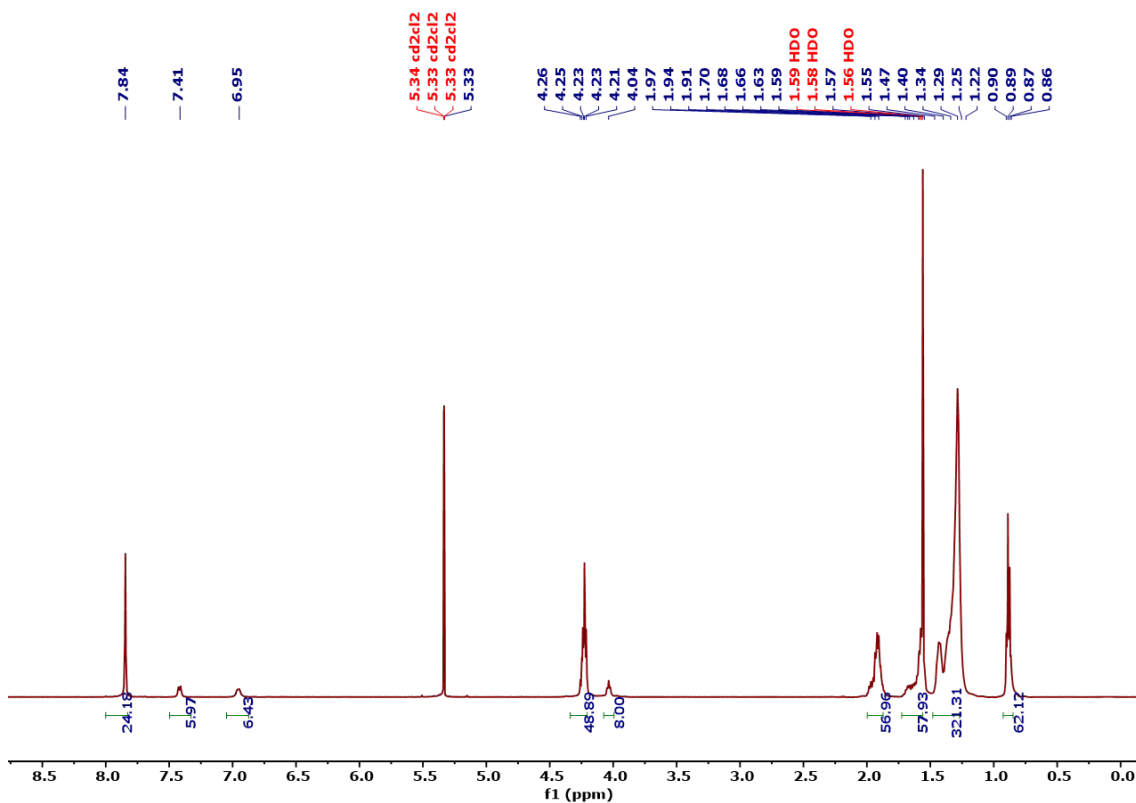

Figure ESI24.  $^1\text{H}$  NMR spectrum of **10** at 298 K in  $\text{CD}_2\text{Cl}_2$

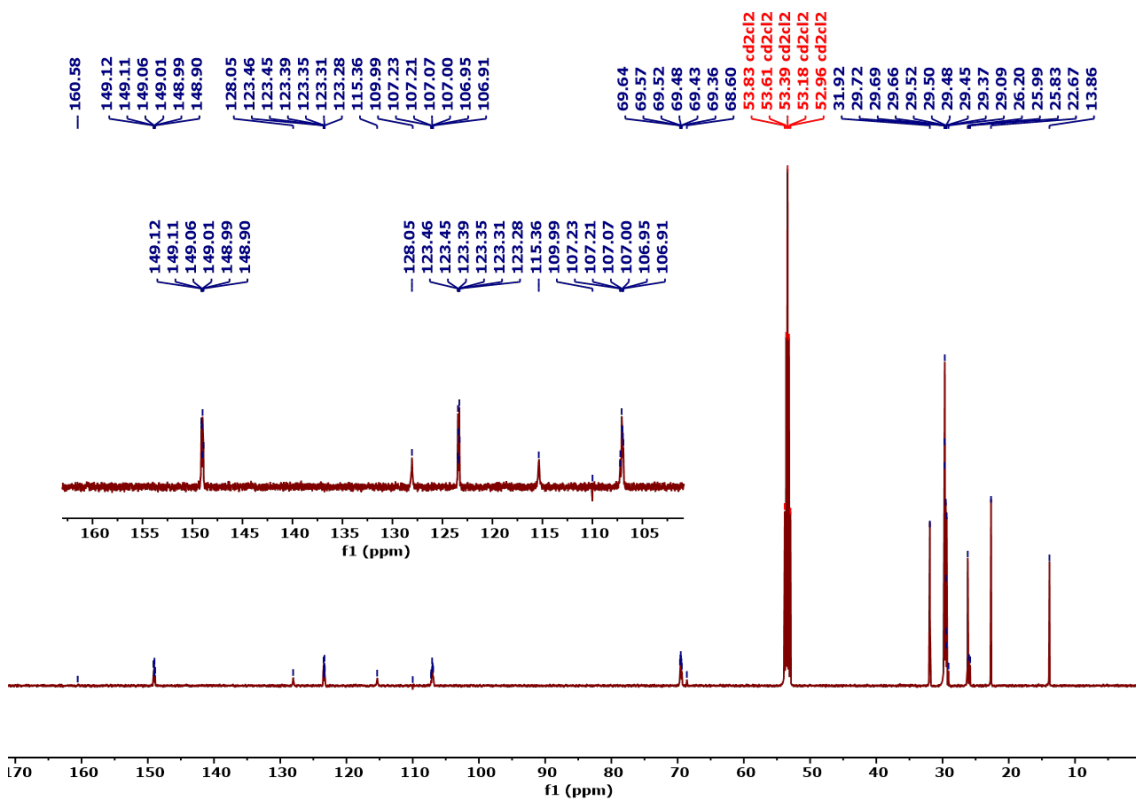

Figure ESI25.  $^{13}\text{C}\{^1\text{H}\}$  NMR spectra of **10** at 298 K in  $\text{CD}_2\text{Cl}_2$

#### v) General Synthesis for complexes $[\text{Rh}(\text{L}^{\text{D}})_4](\text{BF}_4)$

The corresponding isocyanotriphenylene ligand (molar ratio 4:1) in dry dichloromethane was added slowly to a stirred solution of  $[\text{Rh}(\text{COD})_2](\text{BF}_4)$  in dry dichloromethane and the mixture was stirred at room temperature for 1h. Then the solution was concentrated by evaporation under reduced pressure to a small volume, and MeCN (5 mL) was added and the mixture was cooled at  $-22\text{ }^\circ\text{C}$  overnight. The precipitate formed was filtered and washed with MeCN ( $3 \times 5\text{ mL}$ ) and cool acetone ( $1 \times 3\text{ mL}$ ) to remove the free COD. Finally, the solid was vacuum dried.

#### $[\text{Rh}(\text{L}^{\text{D1}})_4](\text{BF}_4)$ (**14**)

Reagents:  $[\text{Rh}(\text{COD})_2](\text{BF}_4)$  (10 mg, 0.025 mmol) in  $\text{CH}_2\text{Cl}_2$  (20 mL),  $\text{L}^{\text{D1}}$  (**9**) (135 mg, 0.098 mmol) in  $\text{CH}_2\text{Cl}_2$  (5 mL), A color change of the solution was observed (from red to brown-greenish). A green solid was obtained: 120 mg (86%).

$^1\text{H}$  NMR (499.72 MHz,  $\text{CD}_2\text{Cl}_2$  298 K, Figure ESI26):  $\delta$  7.85 (s, 24H, Ar-H), 7.43 (d,  $J = 8.11\text{ Hz}$ , 8H, Ar-H), 6.97 (d,  $J = 8.11$ , 8H, Ar-H), 4.26-4.22 (m, 48H, O- $\text{CH}_2$ ), 4.05 (t,  $J = 6.2\text{ Hz}$ , 8H, O- $\text{CH}_2$ ) 2.01-1.85 (m, 56H, O- $\text{CH}_2$ - $\text{CH}_2$ ), 1.71-1.55 (m, 56H, O- $\text{CH}_2$ - $\text{CH}_2$ - $\text{CH}_2$ ), 1.47-1.26 (m, 320H,  $(\text{CH}_2)_n$ ), 0.89-0.84 (m, 60H,  $\text{CH}_3$ ).

$^{13}\text{C}\{^1\text{H}\}$  NMR (125.67 MHz,  $\text{CD}_2\text{Cl}_2$  298 K, Figure ESI27):  $\delta$  (CN not observed), 160.62 ( $\text{OC}_{\text{Ph}}$ ), 149.12, 149.06, 148.98, 148.88 (O- $\text{C}_{\text{TriPh}}$ ), 128.08 (H- $\text{C}_{\text{Ph}}$ ), 123.51, 123.46, 123.40, 123.30, 123.27, 123.21 ( $\text{C}_{\text{TriPh}}$ ), 118.43 (N- $\text{C}_{\text{Ph}}$ ), 115.43 (H- $\text{C}_{\text{Ph}}$ ), 107.23, 107.09, 107.07, 106.99, 106.93, 106.90 (H- $\text{C}_{\text{TriPh}}$ ), 69.66, 69.58, 69.52, 69.47, 69.42, 69.35, 68.66 (O- $\text{CH}_2$ ), 31.91, 29.71, 29.69, 29.66, 29.51, 29.44, 29.36, 29.06, 26.20, 25.98, 25.81, 22.67 ( $-\text{CH}_2-$ ), 13.86 ( $-\text{CH}_3$ ).

$^{19}\text{F}$  NMR (470.15 MHz,  $\text{CD}_2\text{Cl}_2$ ; 298 K, Figure ESI28):  $\delta$  -153.48 ( $\text{B}^{13}$ ), -153.54 ( $\text{B}^{11}$ ).

IR (ATR, neat,  $\text{cm}^{-1}$ ): 2156 ( $\nu_{\text{C}\equiv\text{N}}$ ).

MS (MALDI-TOF):  $m/z$  calc. for  $[(\text{M}^+ - (\text{BF}_4^-))]$  ( $\text{M}^+ = \text{C}_{364}\text{H}_{588}\text{N}_4\text{O}_{28}\text{Rh}$ ): 5568.3794; found: 5568.3774

*Anal.* Calcd. (%) for  $\text{C}_{364}\text{H}_{588}\text{BF}_4\text{N}_4\text{O}_{28}\text{Rh}$ : C, 77.27; H, 10.47; N, 0.99; found: C, 76.91; H, 10.28; N, 1.02.

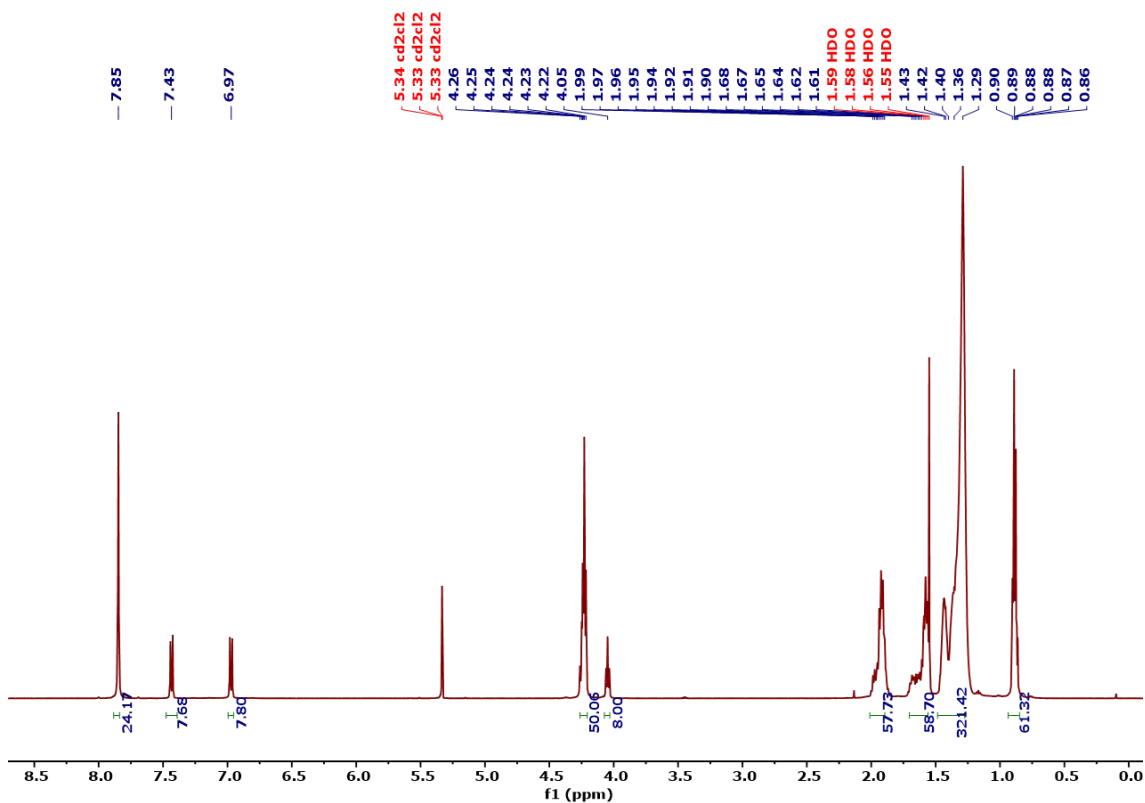

Figure ESI26.  $^1\text{H}$  NMR spectrum of **14** at 298 K in  $\text{CD}_2\text{Cl}_2$

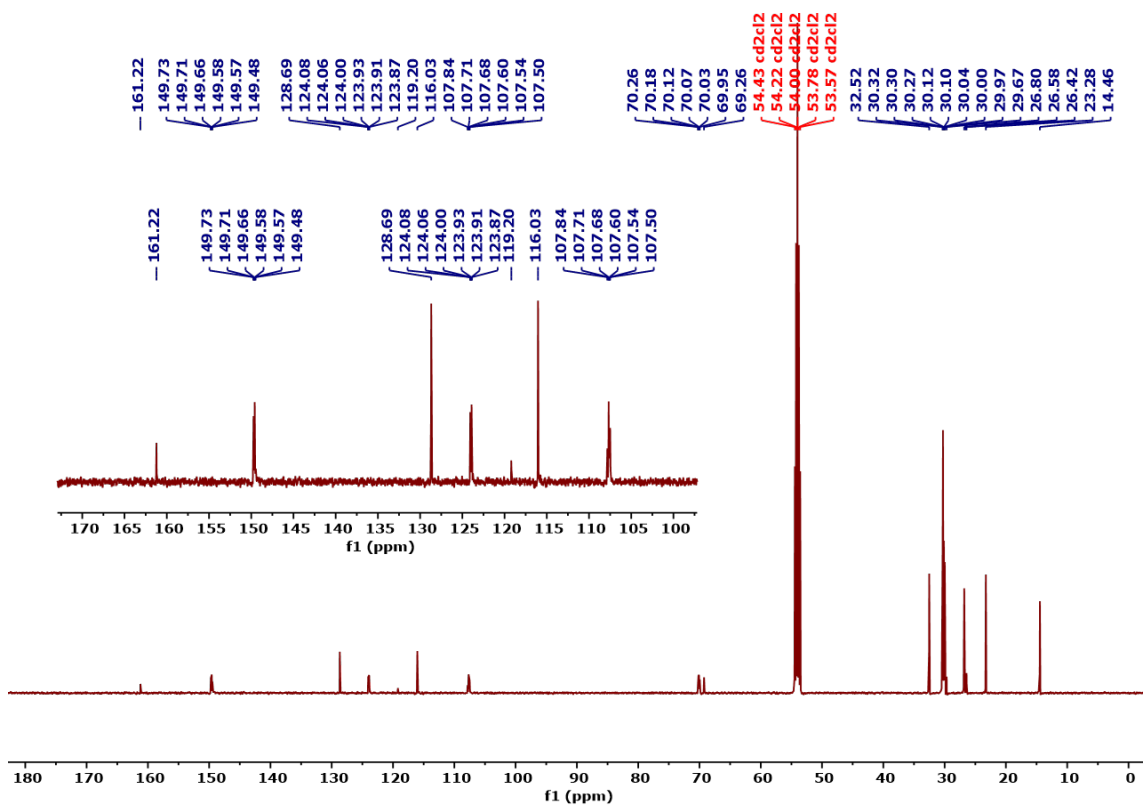

Figure ESI27.  $^{13}\text{C}\{^1\text{H}\}$  NMR spectrum of **14** at 298 K in  $\text{CD}_2\text{Cl}_2$

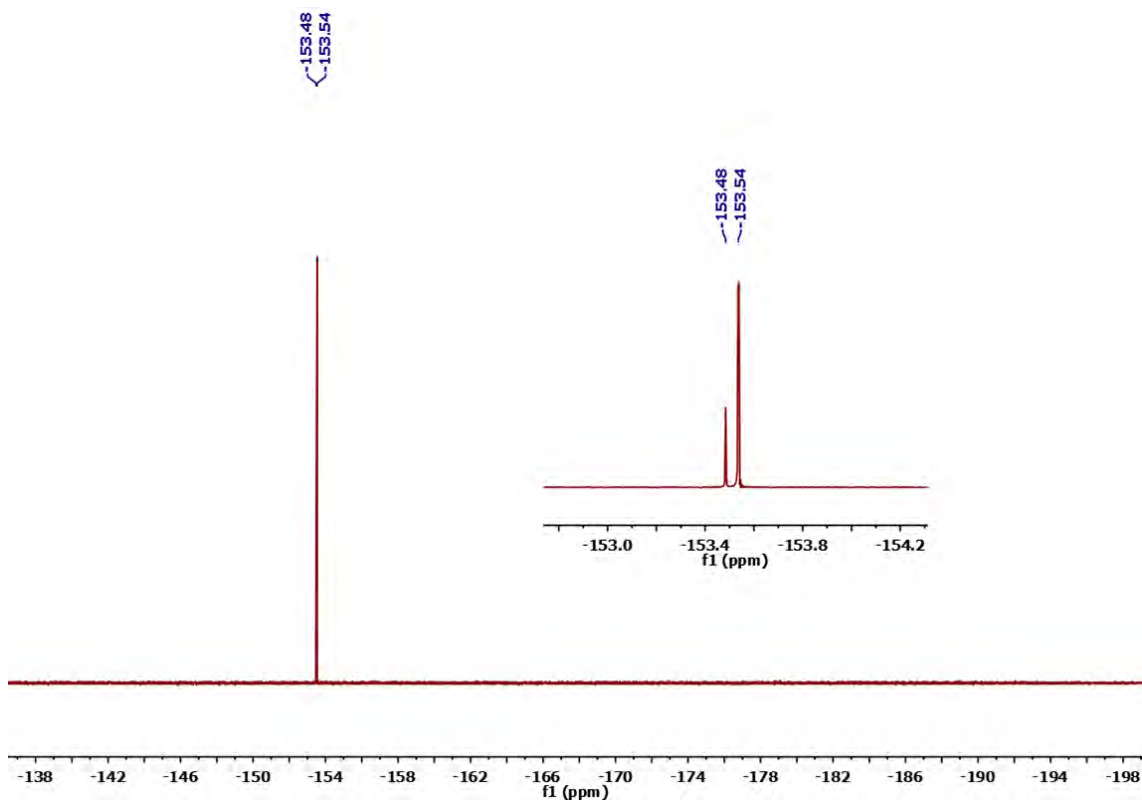

Figure ESI28.  $^{19}\text{F}$  NMR spectrum of **14** at 298 K in  $\text{CD}_2\text{Cl}_2$

**$[\text{Rh}(\text{L}^{\text{D}2})_4](\text{BF}_4)$  (**15**)**

Reagents:  $[\text{Rh}(\text{COD})_2](\text{BF}_4)$  (7.2 mg, 0.018 mmol) in  $\text{CH}_2\text{Cl}_2$  (20 mL),  $\text{L}^{\text{D}2}$  (100 mg, 0.072 mmol) in  $\text{CH}_2\text{Cl}_2$  (5 mL). A color change of the solution was observed (from red to yellow-greenish). A red solid was obtained: 120 mg (86%).

$^1\text{H}$  NMR (499.72 MHz,  $\text{CD}_2\text{Cl}_2$  298 K, Figure ESI29):  $\delta$  7.85 (s, 24H, Ar-H), 6.70 (s, 8H, Ar-H), 4.37-4.17 (m, 48H, O- $\text{CH}_2$ ), 4.00 (t,  $J = 6.2$  Hz, 8H, O- $\text{CH}_2$ ), 2.41 (s, 24H, 4 x (2  $\times$   $\text{CH}_3$ , Xylyl), 2.14-1.87 (m, 56H, O- $\text{CH}_2$ - $\text{CH}_2$ ), 1.69-1.55 (m, 56H, O- $\text{CH}_2$ - $\text{CH}_2$ - $\text{CH}_2$ ), 1.47-1.25 (m, 320H,  $(\text{CH}_2)_n$ ), 0.91-0.87 (m, 60H,  $\text{CH}_3$ ).

$^{13}\text{C}\{^1\text{H}\}$  NMR (125.67 MHz,  $\text{CD}_2\text{Cl}_2$  298 K, Figure ESI30):  $\delta$  (CN not observed), 159.90 ( $\text{OC}_{\text{Ph}}$ ), 149.12, 149.11, 149.06, 149.00, 148.99, 148.90 ( $\text{O-C}_{\text{TriPh}}$ ), 137.02 ( $\text{CH}_3\text{-C}_{\text{Ph}}$ ), 123.46, 123.40, 123.34, 123.32, 123.31, 123.28, ( $\text{C}_{\text{TriPh}}$ ), 118.79 ( $\text{N-C}_{\text{Ph}}$ ), 114.02 ( $\text{H-C}_{\text{Ph}}$ ), 107.21, 107.08, 107.00, 106.95, 106.94, 106.91 ( $\text{H-C}_{\text{TriPh}}$ ), 69.64, 69.58, 69.52, 69.48, 69.44, 69.37, 68.40 (O- $\text{CH}_2$ ), 31.93, 29.73, 29.70, 29.67, 29.53, 29.51, 29.45, 29.38, 29.12, 26.21, 25.99, 25.84, 22.68 ( $-\text{CH}_2-$ ), 18.82 ( $-\text{CH}_3$ , Xylyl), 13.87 ( $-\text{CH}_3$ ).

$^{19}\text{F}$  NMR (470.15 MHz,  $\text{CD}_2\text{Cl}_2$ ; 298 K, Figure ESI31):  $\delta$  -153.43 ( $\text{B}^{13}$ ), -153.48 ( $\text{B}^{11}$ ).

IR (ATR, neat,  $\text{cm}^{-1}$ ): 2140 ( $\nu_{\text{C}\equiv\text{N}}$ ).



MS (MALDI-TOF):  $m/z$  calcd. for  $(M^+ - BF_4^-)$  ( $M^+ = C_{372}H_{604}N_4O_{28}Rh$ : 5679.5012; found: 5679.4967.

*Anal.* Calcd. (%) for  $C_{372}H_{604}BF_4N_4O_{28}Rh$ : C, 77.43; H, 10.55; N, 0.97; found: C, 77.24; H, 10.69; N, 0.91.

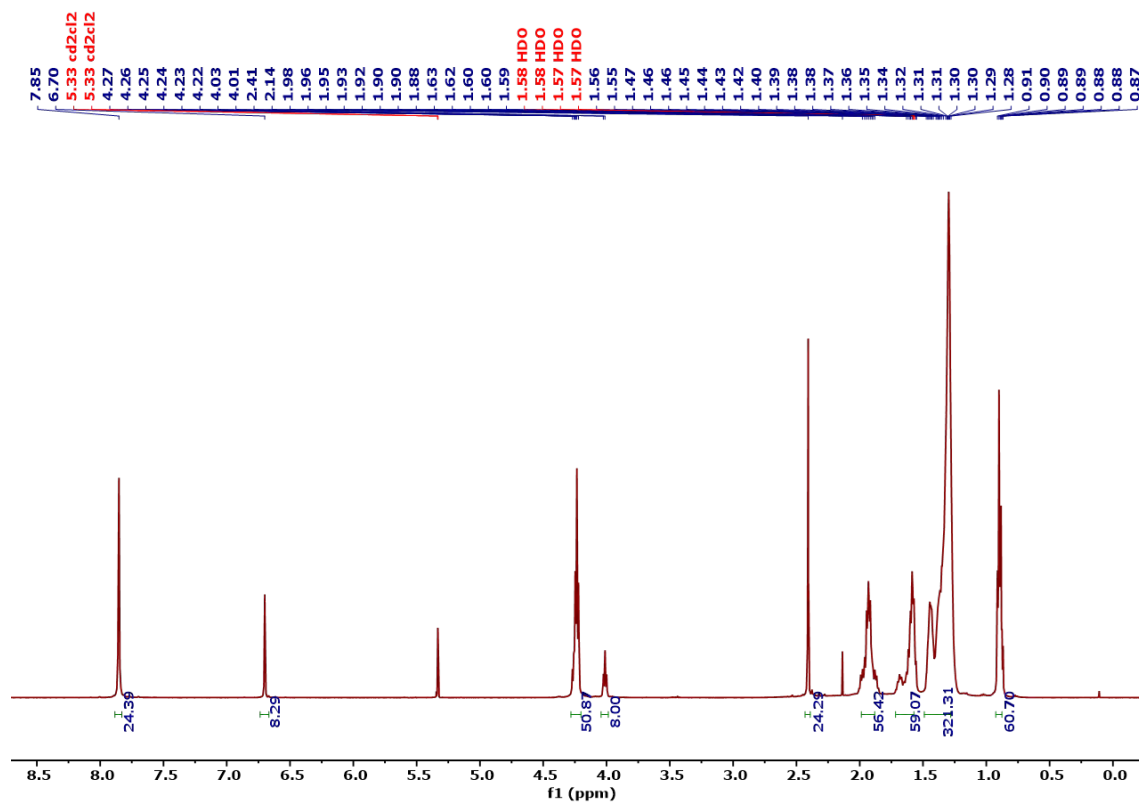

Figure ESI29.  $^1H$  NMR spectrum of **15** at 298 K in  $CD_2Cl_2$

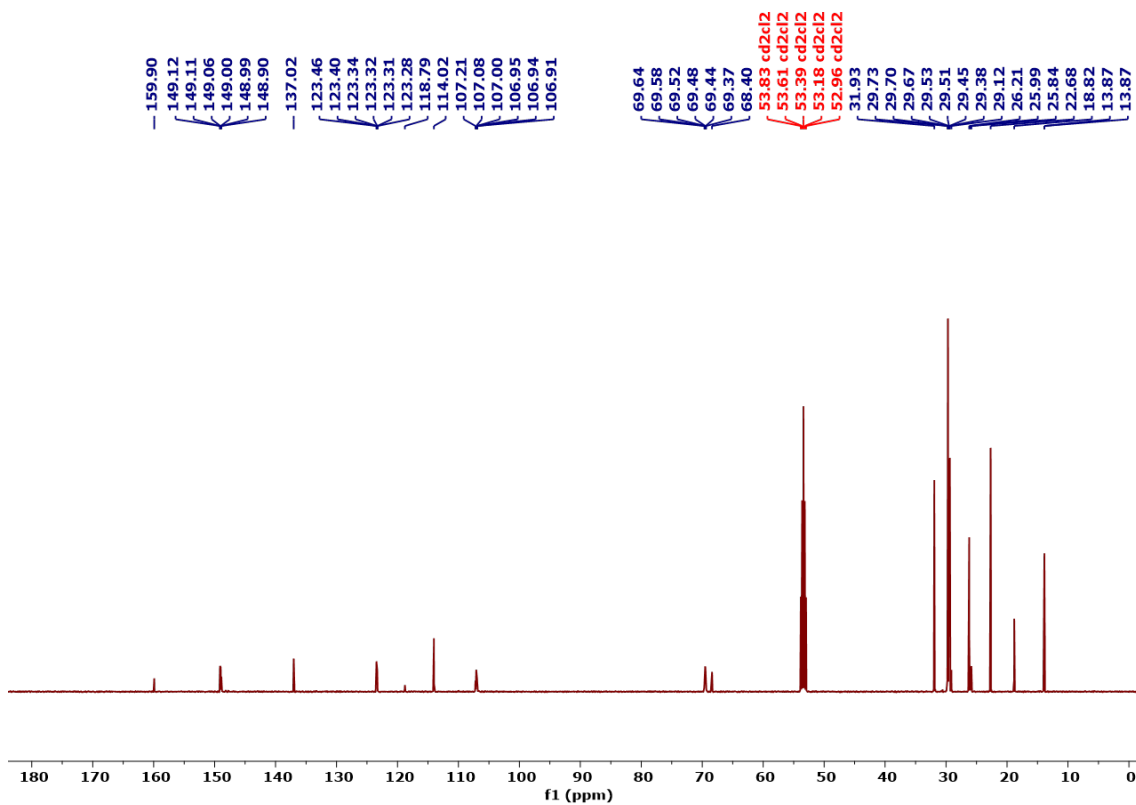

Figure ESI30.  $^{13}\text{C}\{^1\text{H}\}$  NMR spectrum of **15** at 298 K in  $\text{CD}_2\text{Cl}_2$

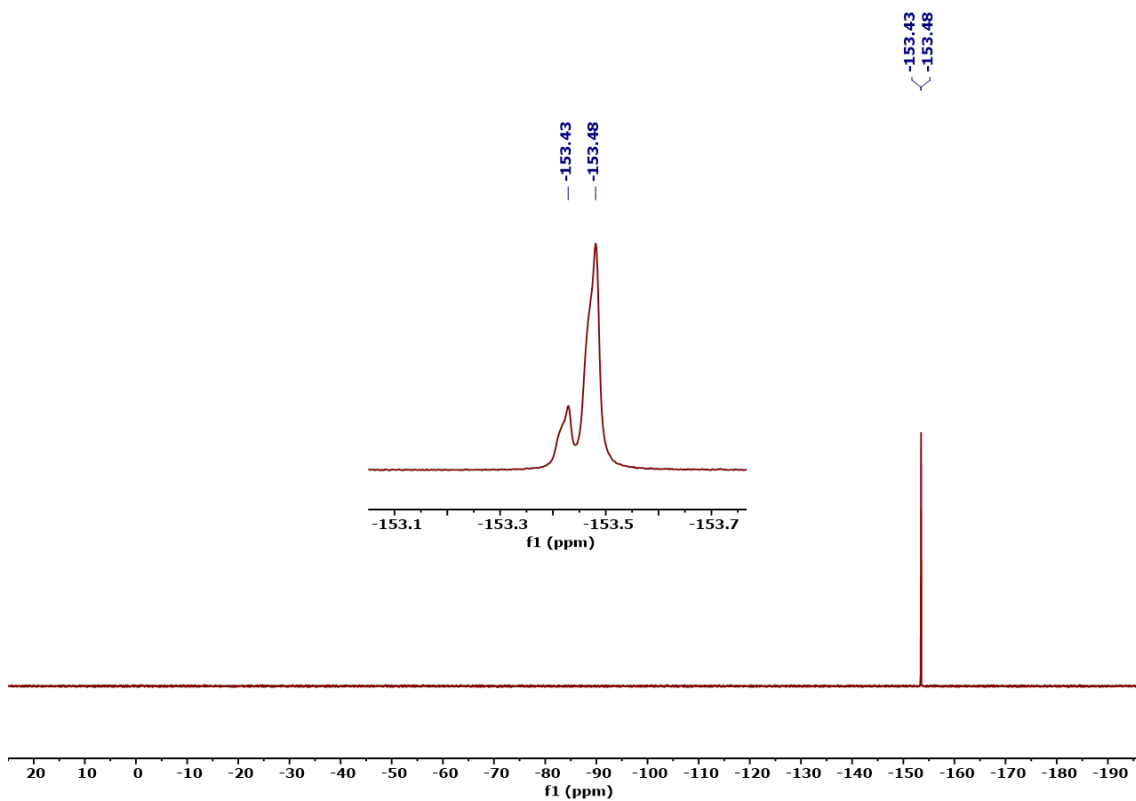

Figure ESI31.  $^{19}\text{F}$  NMR spectrum of **15** at 298 K in  $\text{CD}_2\text{Cl}_2$

**vi) General Synthesis for complexes [Rh(L<sup>D</sup>)]<sub>4</sub>[Au(CN)<sub>2</sub>]**

**[Rh(L<sup>D1</sup>)<sub>4</sub>][Au(CN)<sub>2</sub>] (19)**

A K[Au(CN)<sub>2</sub>] (3.9 mg, 0.026 mmol) solution in acetone (3 mL) was added dropwise into a solution of [Rh(L<sup>D1</sup>)<sub>4</sub>](BF<sub>4</sub>) (**14**) (70 mg, 0.012 mmol) in CH<sub>2</sub>Cl<sub>2</sub> (40 mL). This mixture was stirred for 2 h at rt. Then, it was evaporated and the blue-greenish residue was washed with water (3 × 5 mL) and a cool mixture of CH<sub>3</sub>CN-acetone (3:1). Finally, the dark green solid was vacuum dried. Yield 60 mg (83%).

<sup>1</sup>H NMR (499.72 MHz, CD<sub>2</sub>Cl<sub>2</sub> 298 K, Figure ESI32): δ 7.85 (s, 24H, Ar-*H*), 7.46 (d, J = 8.11 Hz, 8H, Ar-*H*), 6.96 (d, J = 8.11, 8H, Ar-*H*), 4.26-4.21 (m, 48H, O-CH<sub>2</sub>), 4.04 (t, J = 6.2 Hz, 8H, O-CH<sub>2</sub>), 2.00-1.84 (m, 56H, O-CH<sub>2</sub>-CH<sub>2</sub>), 1.71-1.55 (m, 56H, O-CH<sub>2</sub>-CH<sub>2</sub>-CH<sub>2</sub>), 1.48-1.27 (m, 320H, (CH<sub>2</sub>)<sub>n</sub>), 0.93-0.82 (m, 60H, CH<sub>3</sub>).

<sup>13</sup>C {<sup>1</sup>H} NMR (125.67 MHz, CD<sub>2</sub>Cl<sub>2</sub> 298 K, Figure ESI33): δ (CN not observed), 160.48 (OC<sub>Ph</sub>), 149.11, 149.05, 148.99, 148.90 (O-C<sub>TriPh</sub>), 128.11 (H-C<sub>Ph</sub>), 123.44, 123.42, 123.39, 123.36, 123.31, 123.28 (C<sub>TriPh</sub>), 118.87 (N-C<sub>Ph</sub>), 115.33 (H-C<sub>Ph</sub>), 107.20, 107.07, 106.99, 106.96, 106.92, 106.85 (H-C<sub>TriPh</sub>), 69.64, 69.57, 69.52, 69.48, 69.44, 69.36, 68.61 (O-CH<sub>2</sub>), 31.92, 29.72, 29.69, 29.66, 29.51, 29.49, 29.37, 29.09, 26.20, 25.99, 25.83, 22.67 (-CH<sub>2</sub>-), 13.86 (-CH<sub>3</sub>).

IR (ATR, neat, cm<sup>-1</sup>): 2157 (ν<sub>N=C-Rh</sub>).

MS (MALDI-TOF): m/z calc. for ((M<sup>+</sup> + H) - [Au(CN)<sub>2</sub>]<sup>-</sup>) (M<sup>+</sup> = C<sub>364</sub>H<sub>588</sub>N<sub>4</sub>O<sub>28</sub>Rh): 5570.39; found: 5571.90; m/z calc. for ((M<sup>+</sup>/2) - [Au(CN)<sub>2</sub>]<sup>-</sup>) (M<sup>+</sup>/2 = C<sub>182</sub>H<sub>294</sub>N<sub>2</sub>O<sub>14</sub>Rh): 2837.1472; found: 2837.1434.

*Anal.* Calcd. (%) for C<sub>366</sub>H<sub>588</sub>AuN<sub>6</sub>O<sub>28</sub>Rh: C, 75.52; H, 10.18; N, 1.44; found C, 75.38; H, 9.57; N, 1.39.

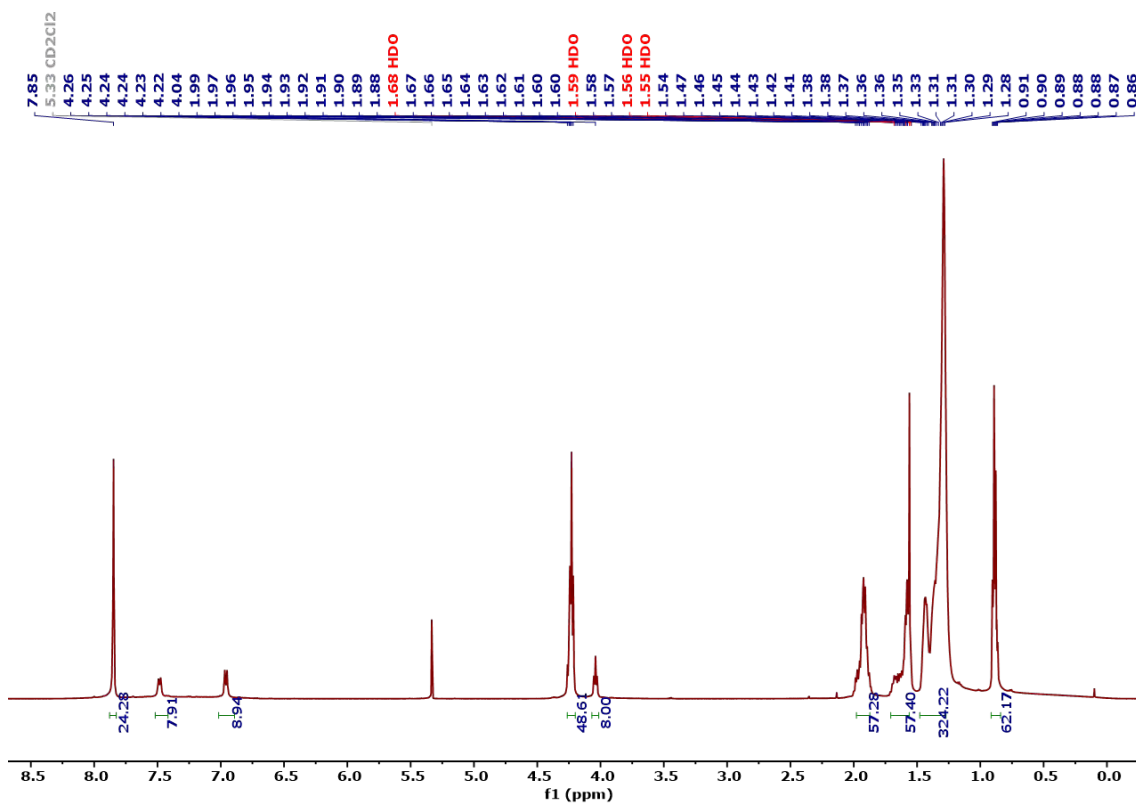

Figure ESI32. <sup>1</sup>H NMR spectrum of **19** at 298 K in CD<sub>2</sub>Cl<sub>2</sub>

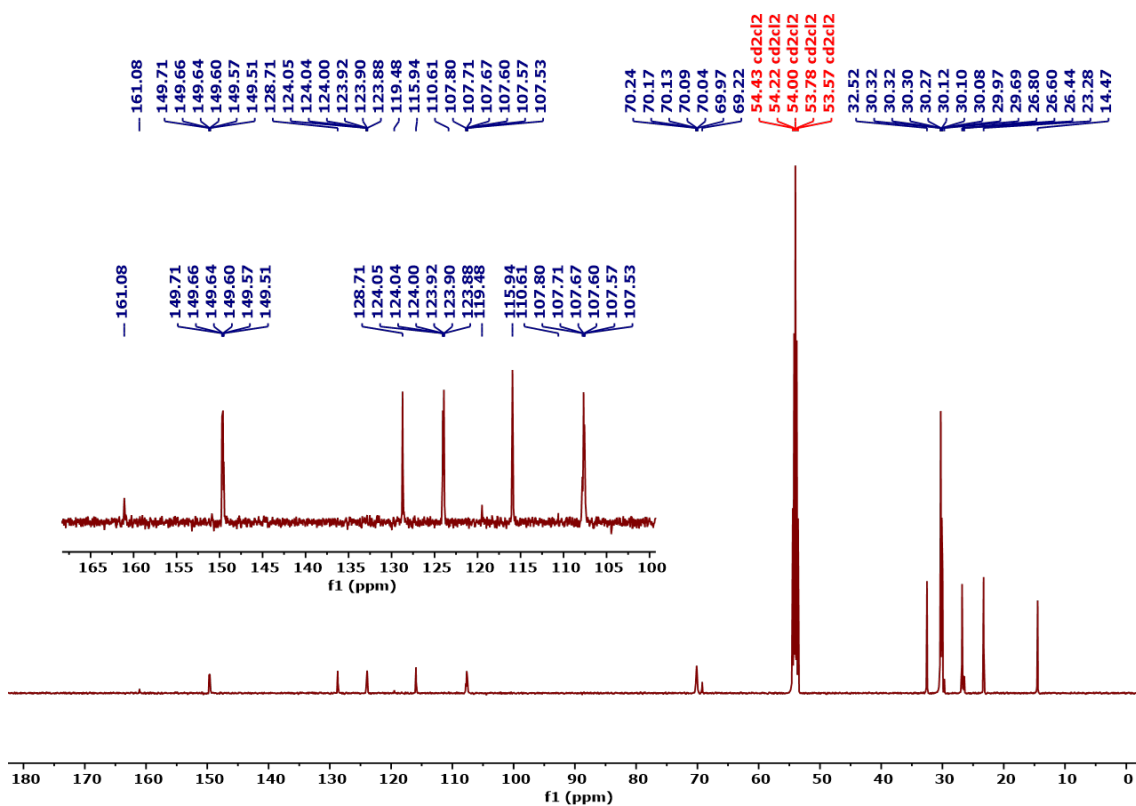

Figure ESI33. <sup>13</sup>C{<sup>1</sup>H} NMR spectrum of **19** at 298 K in CD<sub>2</sub>Cl<sub>2</sub>

**[Rh(L<sup>D2</sup>)<sub>4</sub>][Au(CN)<sub>2</sub>] (20)**

A K[Au(CN)<sub>2</sub>] (3.3 mg, 0.026 mmol) solution in acetone (3 mL) was added dropwise into a solution of [Rh(L<sup>D2</sup>)<sub>4</sub>]BF<sub>4</sub> (**15**) (60 mg, 0.010 mmol) in CH<sub>2</sub>Cl<sub>2</sub> (40 mL). This mixture was stirred for 3 h at 35 °C. Then, it was evaporated and the blue-greenish residue was washed with water (3 × 5 mL) and with a cool mixture of MeCN-acetone (3:1). Finally, the red solid was vacuum dried. Yield 48 mg (78%).

<sup>1</sup>H NMR (499.72 MHz, CD<sub>2</sub>Cl<sub>2</sub> 298 K, Figure ESI34): δ 7.85 (s, 24H, Ar-*H*), 6.69 (bs, 8H, Ar-*H*), 4.26-4.22 (m, 48H, O-CH<sub>2</sub>), 4.00 (t, J = 6.2 Hz, 8H, O-CH<sub>2</sub>), 2.41 (s, 24H, 4 x (2 × -CH<sub>3</sub>, Xylyl)), 1.99-1.86 (m, 56H, O-CH<sub>2</sub>-CH<sub>2</sub>), 1.70-1.55 (m, 56H, O-CH<sub>2</sub>-CH<sub>2</sub>-CH<sub>2</sub>), 1.47-1.29 (m, 320H, (CH<sub>2</sub>)<sub>n</sub>), 0.91-0.86 (m, 60H, CH<sub>3</sub>).

<sup>13</sup>C {<sup>1</sup>H} NMR (125.67 MHz, CD<sub>2</sub>Cl<sub>2</sub> 298 K, Figure ESI35): δ (CN not observed), 159.84 (OC<sub>Ph</sub>), 149.11, 149.10, 149.06, 149.01, 148.99, 148.90 (O-C<sub>TriPh</sub>), 137.05 (CH<sub>3</sub>-C<sub>Ph</sub>), 123.45, 123.40, 123.31, 123.28 (C<sub>TriPh</sub>), 118.84 (N-C<sub>Ph</sub>), 113.98 (H-C<sub>Ph</sub>), 107.20, 107.18, 107.08, 107.00, 106.95, 106.91 (H-C<sub>TriPh</sub>), 69.64, 69.58, 69.52, 69.44, 69.37, 68.38 (O-CH<sub>2</sub>), 31.92, 29.72, 29.70, 29.50, 29.44, 29.37, 26.20, 26.16, 25.99, 25.84, 22.68, 18.86 (-CH<sub>2</sub>-), 18.86 (Ph-CH<sub>3</sub>) 13.87, 13.86 (-CH<sub>3</sub>).

IR (ATR, neat, cm<sup>-1</sup>): 2139 (ν<sub>N≡C-Rh</sub>).

MS (MALDI-TOF): m/z calc. for (M<sup>+</sup>-[Au(CN)<sub>2</sub>]) (M<sup>+</sup> = C<sub>372</sub>H<sub>604</sub>N<sub>4</sub>O<sub>28</sub>Rh): 5679.5012; found: 5679.5060.

*Anal.* Calcd. (%) for C<sub>374</sub>H<sub>604</sub>AuN<sub>6</sub>O<sub>28</sub>Rh: C, 75.72; H, 10.26; N, 1.42; found C, 75.40; H, 10.16; N, 1.48.

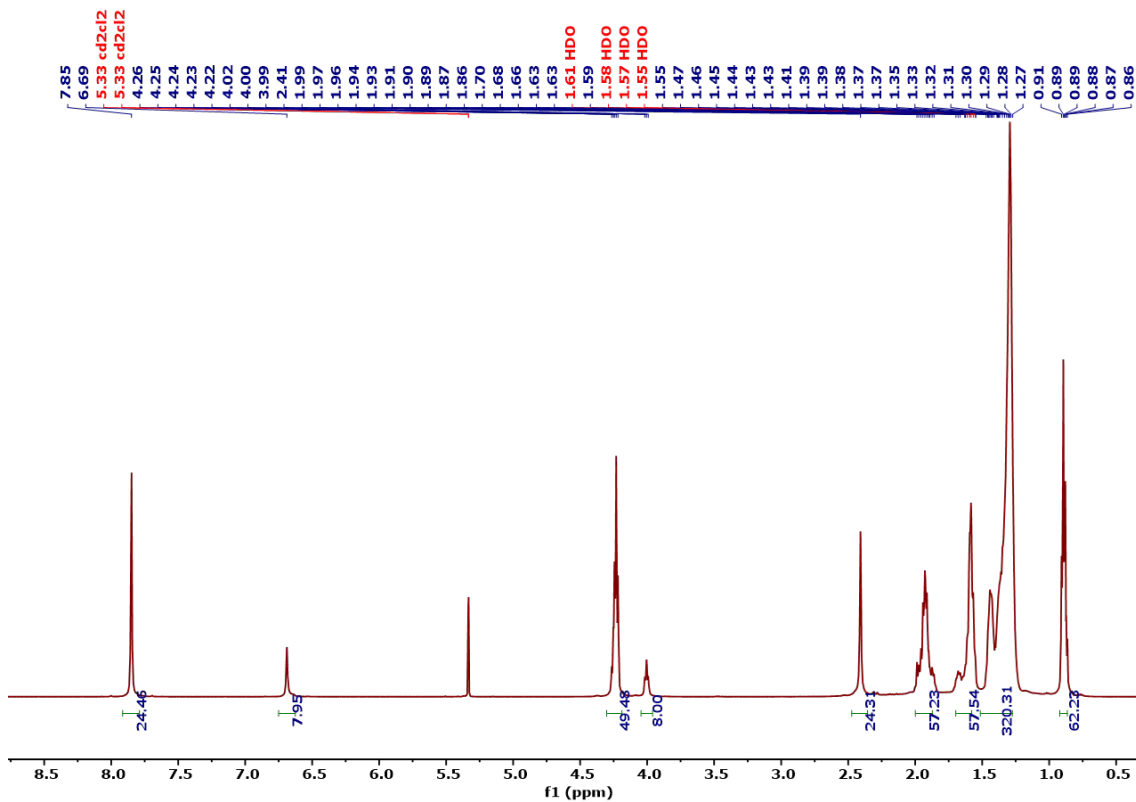

Figure ESI34.  $^1\text{H}$  NMR spectrum of **20** at 298 K in  $\text{CD}_2\text{Cl}_2$ .

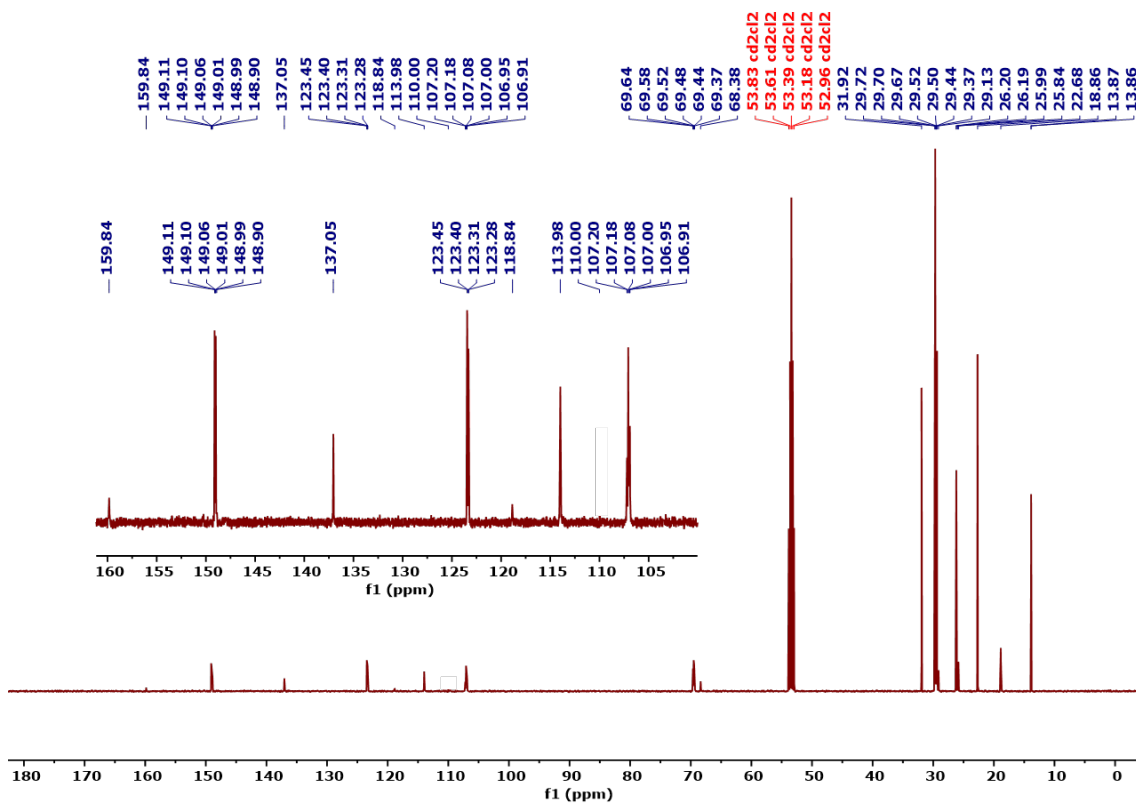

Figure ESI35.  $^{13}\text{C}\{^1\text{H}\}$  NMR spectrum of **20** at 298 K in  $\text{CD}_2\text{Cl}_2$ .

## UV-VISIBLE DATA

Table ESI2: UV-visible data for the free isocyanides and the isocyanide rhodium complexes, in dichloromethane solution at 298 K

| Compd.                    | UV-Vis (CH <sub>2</sub> Cl <sub>2</sub> )/nm ( $\epsilon/M^{-1} \text{ cm}^{-1}$ )                                                          |
|---------------------------|---------------------------------------------------------------------------------------------------------------------------------------------|
| <b>6 (L<sup>D2</sup>)</b> | 279.5 ( $20.3 \cdot 10^4$ ), 308 ( $5.03 \cdot 10^4$ ), 346 ( $7.00 \cdot 10^3$ )                                                           |
| <b>9<sup>b</sup></b>      | 227.5 ( $6.33 \cdot 10^4$ ), 256.5 ( $3.60 \cdot 10^4$ ), 331.5 ( $4.15 \cdot 10^4$ ), 407 ( $5.22 \cdot 10^3$ ), 457 ( $6.20 \cdot 10^2$ ) |
| <b>10<sup>a</sup></b>     | 279.5 ( $30.5 \cdot 10^4$ ), 346 ( $5.60 \cdot 10^4$ ), 405 ( $5.80 \cdot 10^3$ ), 460 ( $7.00 \cdot 10^2$ )                                |
| <b>11<sup>b</sup></b>     | 250.5 ( $7.15 \cdot 10^4$ ), 337 ( $5.51 \cdot 10^4$ ), 408 ( $7.40 \cdot 10^3$ ), 460 ( $1.18 \cdot 10^3$ )                                |
| <b>12<sup>a</sup></b>     | 260 ( $8.32 \cdot 10^4$ ), 347.5 ( $6.10 \cdot 10^4$ ), 405 ( $9.20 \cdot 10^3$ ), 460 ( $2.00 \cdot 10^3$ )                                |
| <b>13<sup>b</sup></b>     | 227.5 ( $6.81 \cdot 10^4$ ), 257 ( $4.63 \cdot 10^4$ ), 334 ( $4.92 \cdot 10^4$ ), 411 ( $6.72 \cdot 10^3$ ), 465 ( $7.80 \cdot 10^2$ )     |
| <b>14<sup>a</sup></b>     | 272 ( $34.8 \cdot 10^4$ ), 346.5 ( $6.75 \cdot 10^4$ ), 406 ( $6.80 \cdot 10^3$ ), 462 ( $9.00 \cdot 10^2$ )                                |
| <b>15<sup>a</sup></b>     | 280 ( $37.4 \cdot 10^4$ ), 309 ( $13.5 \cdot 10^4$ ), 348 ( $8.13 \cdot 10^4$ ), 406 ( $9.10 \cdot 10^3$ ), 462 ( $1.60 \cdot 10^2$ )       |
| <b>16<sup>b</sup></b>     | 226.5 ( $5.90 \cdot 10^4$ ), 260 ( $3.73 \cdot 10^4$ ), 334.5 ( $2.84 \cdot 10^4$ ), 412 ( $3.46 \cdot 10^3$ )                              |
| <b>17<sup>a</sup></b>     | 269 ( $15.7 \cdot 10^4$ ), 340 ( $4.71 \cdot 10^4$ ), 402.5 ( $6.60 \cdot 10^3$ )                                                           |
| <b>18<sup>b</sup></b>     | 227 ( $6.88 \cdot 10^4$ ), 260 ( $4.90 \cdot 10^4$ ), 334 ( $4.01 \cdot 10^4$ ), 412 ( $4.80 \cdot 10^3$ )                                  |
| <b>19<sup>a</sup></b>     | 279 ( $33.5 \cdot 10^4$ ), 309 ( $9.91 \cdot 10^4$ ), 345 ( $5.14 \cdot 10^4$ ), 407 ( $4.30 \cdot 10^3$ )                                  |
| <b>20<sup>a</sup></b>     | 280 ( $36.2 \cdot 10^4$ ), 309 ( $13.0 \cdot 10^4$ ), 348 ( $7.70 \cdot 10^4$ ), 406 ( $5.50 \cdot 10^3$ )                                  |

<sup>a</sup>Spectra recorded at  $10^{-5}$  M. <sup>b</sup>Spectra recorded at  $5 \times 10^{-5}$  M.

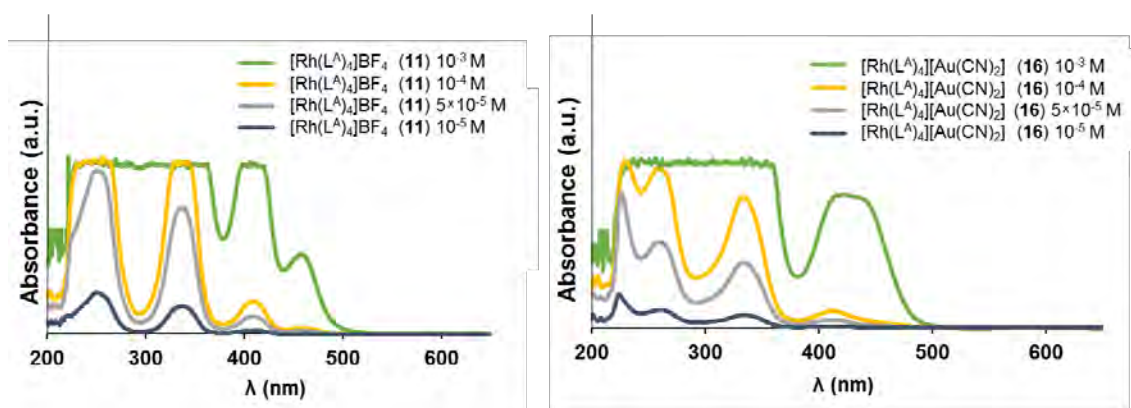

Figure ESI36. UV-Visible spectra of the complexes **11** and **16** in dichloromethane solutions at different molarities and 298 K.

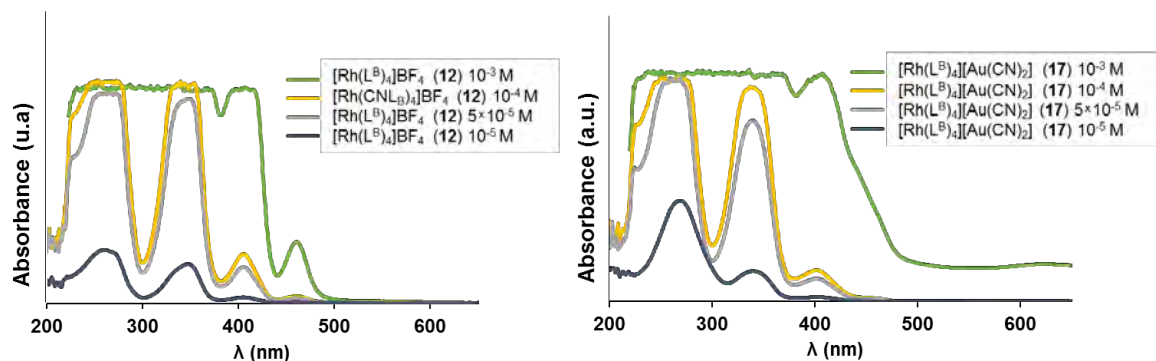

Figure ESI37. UV-Visible spectra of the complexes **12** and **17** in dichloromethane solutions at different molarities and 298 K.

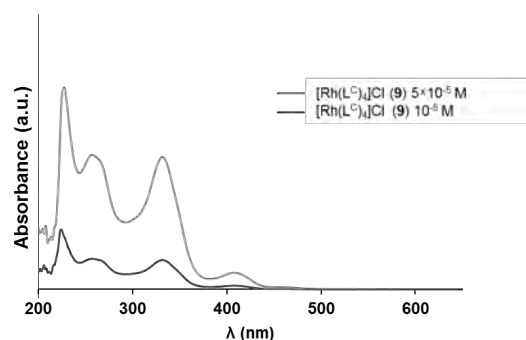

**Figure ESI38.** UV-Visible spectra of the complex **9** in dichloromethane solutions at different molarities and 298 K.

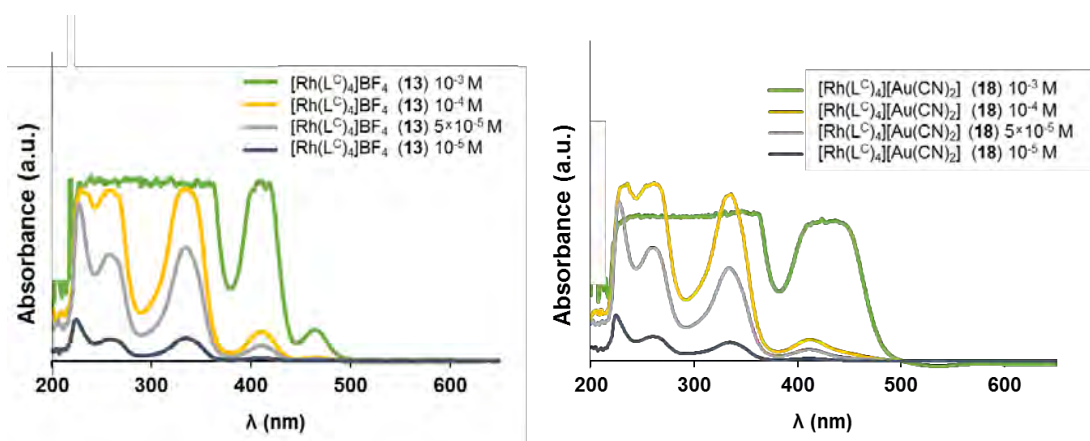

**Figure ESI39.** UV-Visible spectra of the complexes **13** and **18** in dichloromethane solutions at different molarities and 298 K.

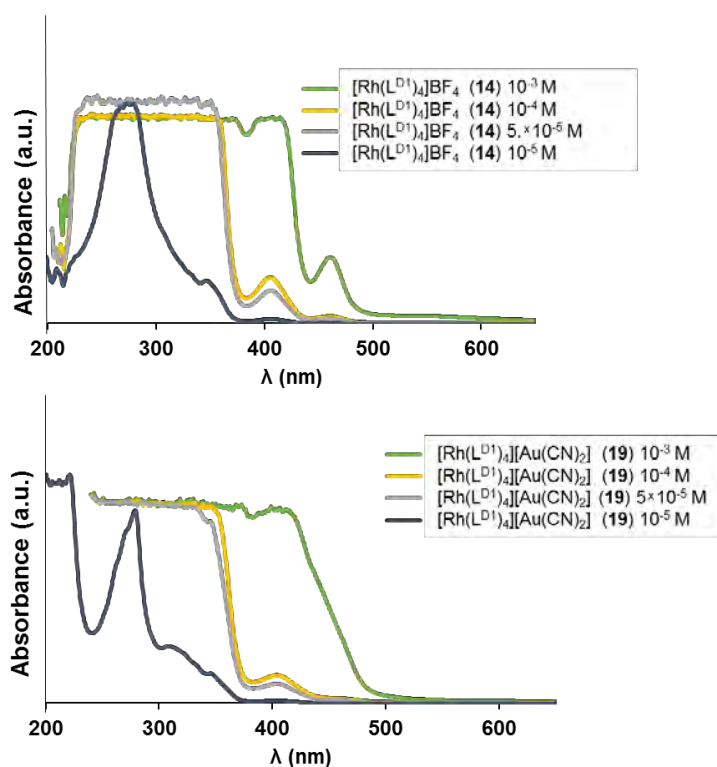

**Figure ESI40.** UV-Visible spectra of the complexes **14** and **19** in dichloromethane solutions at different molarities and 298 K.



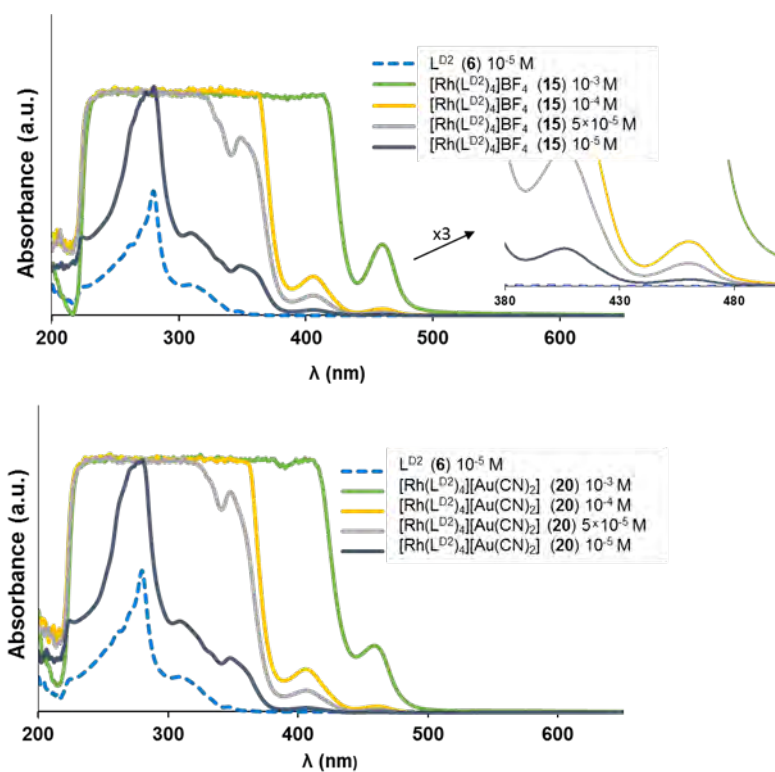

**Figure ESI41.** UV-Visible spectra of the ligand **6** and the complexes **15** and **20** in dichloromethane solutions at different molarities and 298 K. \*The top picture shows a magnified region for observing the existence of curves around 465 nm at lower concentration of  $5 \times 10^{-5}$  M for complex **15**

## REFINEMENT DATA OF THE X-RAY STRUCTURES

### a) In Single crystal

**Table ES13:** Crystal data and structure refinements for complexes (9) and (11).

|                                          | [Rh{3,5-(OMe) <sub>2</sub> C <sub>6</sub> H <sub>3</sub> (NC)} <sub>4</sub> ]Cl<br>(9) | [Rh( <i>p</i> -MeC <sub>6</sub> H <sub>4</sub> (NC)) <sub>4</sub> ]BF <sub>4</sub><br>(11) |
|------------------------------------------|----------------------------------------------------------------------------------------|--------------------------------------------------------------------------------------------|
| Empirical formula                        | C <sub>36</sub> H <sub>36</sub> ClN <sub>4</sub> O <sub>8</sub> Rh                     | C <sub>32</sub> H <sub>28</sub> BN <sub>4</sub> F <sub>4</sub> Rh                          |
| Formula weight                           | 791.05                                                                                 | 658.30                                                                                     |
| Temperature/K                            | 294                                                                                    | 180.00(14)                                                                                 |
| Crystal system                           | monoclinic                                                                             | monoclinic                                                                                 |
| Space group                              | P2 <sub>1</sub> /n                                                                     | C2/c                                                                                       |
| <i>a</i> /Å                              | 3.8977(4)                                                                              | 14.6259(3)                                                                                 |
| <i>b</i> /Å                              | 26.059(3)                                                                              | 16.8572(3)                                                                                 |
| <i>c</i> /Å                              | 21.706(3)                                                                              | 27.9530(5)                                                                                 |
| $\alpha$ /°                              | 90                                                                                     | 90                                                                                         |
| $\beta$ /°                               | 94.320(10)                                                                             | 94.306(2)                                                                                  |
| $\gamma$ /°                              | 90                                                                                     | 90                                                                                         |
| Volume/Å <sup>3</sup>                    | 2198.4(4)                                                                              | 6872.4(2)                                                                                  |
| <i>Z</i>                                 | 2                                                                                      | 8                                                                                          |
| $\rho_{\text{calc}}$ /cm <sup>3</sup>    | 1.195                                                                                  | 1.272                                                                                      |
| $\mu$ /mm <sup>-1</sup>                  | 0.495                                                                                  | 0.543                                                                                      |
| F(000)                                   | 812.0                                                                                  | 2672.0                                                                                     |
| Crystal size/mm <sup>3</sup>             | 0.433 × 0.108 × 0.073                                                                  | 0.422 × 0.353 × 0.225                                                                      |
| Radiation                                | MoK $\alpha$ ( $\lambda$ = 0.71073)                                                    | MoK $\alpha$ ( $\lambda$ = 0.71073)                                                        |
| 2 $\theta$ range for data collection/°   | 7.3 to 59.23                                                                           | 6.736 to 59.41                                                                             |
| Index ranges                             | -4 ≤ <i>h</i> ≤ 4, -30 ≤ <i>k</i> ≤ 32, -15 ≤ <i>l</i> ≤ 28                            | -20 ≤ <i>h</i> ≤ 18, -19 ≤ <i>k</i> ≤ 21, -28 ≤ <i>l</i> ≤ 38                              |
| Reflections collected                    | 8766                                                                                   | 23228                                                                                      |
| Independent reflections                  | 4988 [R <sub>int</sub> = 0.0759, R <sub>sigma</sub> = 0.1339]                          | 8391 [R <sub>int</sub> = 0.0244, R <sub>sigma</sub> = 0.0295]                              |
| Data/restraints/parameters               | 4988/0/236                                                                             | 8391/0/428                                                                                 |
| Goodness-of-fit on F <sup>2</sup>        | 1.019                                                                                  | 1.219                                                                                      |
| Final R indexes [I > 2 $\sigma$ (I)]     | R <sub>1</sub> = 0.0814, wR <sub>2</sub> = 0.2163                                      | R <sub>1</sub> = 0.0966, wR <sub>2</sub> = 0.2604                                          |
| Final R indexes [all data]               | R <sub>1</sub> = 0.1508, wR <sub>2</sub> = 0.2840                                      | R <sub>1</sub> = 0.1090, wR <sub>2</sub> = 0.2665                                          |
| Largest diff. peak/hole/eÅ <sup>-3</sup> | 1.26/-0.64                                                                             | 0.81/-1.02                                                                                 |

## b) In Mesophase

**Table ESI4.** Mesomorphic, Structural, and Geometrical Parameters for complexes  $[\text{Rh}(\text{L}^{\text{Di}})_4]\text{A}$  ( $i = 1,2$ )

| A (anion)<br>Sample type / T<br>(°C) <sup>a</sup> | Phase <sup>b</sup>                          | 2D lattice parameters <sup>c</sup><br>Cell parameters <sup>d</sup>                                                                          | $V_{\text{mol}}$ (Å <sup>3</sup> ) <sup>e</sup><br>$\rho$ (g/cm <sup>3</sup> )<br>$N_{\text{mol}}$ , <sup>f</sup> | $h_{\pi}$ (Å) <sup>g</sup><br>$h_{\text{mol}}$ (Å) | $Z_{\text{col,RhA}}$ , <sup>h</sup><br>$n_{\text{RhA}}$ (Å)<br>$N_{\text{RhA},c}$ | $Z_{\text{col,Tph}}$ , <sup>i</sup><br>$n_{\text{Tph}}$ (Å)<br>$N_{\text{Tph},c}$ | $\langle \psi_{\text{Tph}} \rangle$ (°) <sup>j</sup><br>$dh_{\text{Tph},c}$ (Å) |
|---------------------------------------------------|---------------------------------------------|---------------------------------------------------------------------------------------------------------------------------------------------|-------------------------------------------------------------------------------------------------------------------|----------------------------------------------------|-----------------------------------------------------------------------------------|-----------------------------------------------------------------------------------|---------------------------------------------------------------------------------|
| <b>[Rh(L<sup>D1</sup>)<sub>4</sub>](A)</b>        |                                             |                                                                                                                                             |                                                                                                                   |                                                    |                                                                                   |                                                                                   |                                                                                 |
| A = Cl<br>Film / 20                               | Col <sub>o</sub>                            | $a = 97.8; b = 53.3; \gamma = 97^\circ$<br>$A = 5170 \text{ \AA}^2$ ( $Z = 2$ ); $a/b = 1.83$                                               | 9260<br>1.00                                                                                                      | 3.56<br>3.58                                       | 2<br>3.58                                                                         | 8<br>3.58                                                                         | ~0                                                                              |
| A = Cl<br>Bulk / 20                               | Col <sub>r</sub>                            | $a = 84.2(6); b = 62.0(7); \gamma = 90^\circ$<br>$A = 5230 \text{ \AA}^2$ ( $Z = 2$ ); $a/b = 1.36$                                         | 9260<br>1.00                                                                                                      | 3.55<br>3.54                                       | 2<br>3.54                                                                         | 8<br>3.54                                                                         | ~0                                                                              |
| A = Cl<br>Bulk / 80                               | Col <sub>r</sub>                            | $a = 84.1(4); b = 61.8(4); \gamma = 90^\circ$<br>$A = 5203 \text{ \AA}^2$ ( $Z = 2$ ); $a/b = 1.36$                                         | 9493<br>0.98                                                                                                      | 3.6<br>3.65                                        | 2<br>3.65                                                                         | 8<br>3.65                                                                         | ~0                                                                              |
| A = BF <sub>4</sub><br>Film / 20                  | Col <sub>o</sub>                            | $a = 98.5; b = 57.9; \gamma = 93^\circ$<br>$A = 5695 \text{ \AA}^2$ ( $Z = 2$ ); $a/b = 1.70$                                               | 9282<br>1.01                                                                                                      | 3.55<br>3.26                                       | 2<br>3.26                                                                         | 10<br>4.07                                                                        | 29                                                                              |
| A = BF <sub>4</sub><br>Bulk / 20                  | Col <sub>r</sub>                            | $a = 84.1(2); b = 61.8; \gamma = 90^\circ$<br>$A = 5199 \text{ \AA}^2$ ( $Z = 2$ ); $a/b = 1.36$                                            | 9282<br>1.01                                                                                                      | 3.54<br>3.57                                       | 2<br>3.57                                                                         | 8<br>3.57                                                                         | ~0                                                                              |
| A = BF <sub>4</sub><br>Bulk / 80                  | Col <sub>r</sub><br>+<br>Orth               | $a = 83.9(6); b = 61.4(9); \gamma = 90^\circ$<br>$A = 5163 \text{ \AA}^2$ ( $Z = 2$ ); $a/b = 1.36$                                         | 9515<br>0.99                                                                                                      | 3.55<br>3.69                                       | 2<br>3.69                                                                         | 8<br>3.69                                                                         | 16                                                                              |
|                                                   |                                             | $a = 93.4; b = 62.4(5); \gamma = 90^\circ$<br>$A = 5833 \text{ \AA}^2$ ( $Z = 2$ ); $a/b = 1.50$<br>$c = 48.4(4); V = 282500 \text{ \AA}^2$ | 9515<br>0.99<br>29.7                                                                                              | 3.55<br>3.26                                       | 2<br>3.26                                                                         | 10<br>4.08<br>11.9                                                                | 0<br>5.5                                                                        |
| A = BF <sub>4</sub><br>Bulk / 120                 | Orth                                        | $a = 90.8(8); b = 63.3; \gamma = 90^\circ$<br>$A = 5753 \text{ \AA}^2$ ( $Z = 2$ ); $a/b = 1.44$<br>$c = 48.3(7); V = 278300 \text{ \AA}^2$ | 9671<br>0.97<br>28.8                                                                                              | 3.60<br>3.36                                       | 2<br>3.36                                                                         | 10<br>4.20<br>11.5                                                                | 0<br>6.5                                                                        |
| A = Au(CN) <sub>2</sub><br>Film / 20              | Col <sub>o</sub>                            | $a = 96.6; b = 55.0; \gamma = 96^\circ$<br>$A = 5284 \text{ \AA}^2$ ( $Z = 2$ ); $a/b = 1.76$                                               | 9316<br>1.00                                                                                                      | 3.50<br>3.53                                       | 2<br>3.53                                                                         | 8<br>3.53                                                                         | ~0                                                                              |
| A = Au(CN) <sub>2</sub><br>Bulk / 20              | Col <sub>r</sub>                            | $a = 86.1(5); b = 63.2(9); \gamma = 90^\circ$<br>$A = 5452 \text{ \AA}^2$ ( $Z = 2$ ); $a/b = 1.36$                                         | 9316<br>1.04                                                                                                      | 3.54<br>3.42                                       | 2<br>3.42                                                                         | undefin<br>ed                                                                     | undefined                                                                       |
| A = Au(CN) <sub>2</sub><br>Bulk / 80              | Col <sub>r1</sub><br>+<br>Col <sub>r2</sub> | $a = 85.5(5); b = 62.9(7); \gamma = 90^\circ$<br>$A = 5387 \text{ \AA}^2$ ( $Z = 2$ ); $a/b = 1.36$                                         | 9550<br>1.01                                                                                                      | 3.57<br>3.55                                       | 2<br>3.55                                                                         | 8<br>3.55                                                                         | ~0                                                                              |
|                                                   |                                             | $a = 89.7(7); b = 64.9(6); \gamma = 90^\circ$<br>$A = 5832 \text{ \AA}^2$ ( $Z = 2$ ); $a/b = 1.38$                                         | 9550<br>1.01                                                                                                      | 3.57<br>3.27                                       | 2<br>3.27                                                                         | 10<br>4.09                                                                        | 29                                                                              |
| A = Au(CN) <sub>2</sub><br>Bulk / 120             | Col <sub>r2</sub>                           | $a = 88.6(8); b = 64.9; \gamma = 90^\circ$<br>$A = 5755 \text{ \AA}^2$ ( $Z = 2$ ); $a/b = 1.37$                                            | 9706<br>0.99                                                                                                      | 3.58<br>3.37                                       | 2<br>3.37                                                                         | 10<br>4.22                                                                        | 32                                                                              |
| <b>[Rh(L<sup>D2</sup>)<sub>4</sub>](A)</b>        |                                             |                                                                                                                                             |                                                                                                                   |                                                    |                                                                                   |                                                                                   |                                                                                 |
| A = BF <sub>4</sub><br>Film / 20                  | Col <sub>o</sub>                            | $a = 81.3; b = 60.9; \gamma = 96^\circ$<br>$A = 4930 \text{ \AA}^2$ ( $Z = 2$ ); $a/b = 1.33$                                               | 9492<br>1.01                                                                                                      | 3.55<br>3.85                                       | 2<br>3.85                                                                         | 8<br>3.85                                                                         | 23                                                                              |
| A = BF <sub>4</sub><br>Bulk / 70                  | Col <sub>o</sub>                            | $a = 84.7(7); b = 69.5(4); \gamma = 93.5(8)^\circ$<br>$A = 5883 \text{ \AA}^2$ ( $Z = 2$ ); $a/b = 1.22$                                    | 9691<br>0.99                                                                                                      | 3.60<br>3.29                                       | 2<br>3.29                                                                         | 10<br>4.12                                                                        | 29                                                                              |
| A = Au(CN) <sub>2</sub><br>Film / 20              | Col <sub>o</sub>                            | $a = 75.1; b = 49.6; \gamma = 96^\circ$<br>$A = 3705 \text{ \AA}^2$ ( $Z = 2$ ); $a/b = 1.51$                                               | 9527<br>1.03                                                                                                      | 3.56<br>5.14                                       | 2<br>5.14                                                                         | 6<br>3.86                                                                         | 22                                                                              |
| A = Au(CN) <sub>2</sub><br>Bulk / 80              | Col <sub>o</sub>                            | $a = 83.7(6); b = 69.5(2); \gamma = 93.9(4)^\circ$<br>$A = 5810 \text{ \AA}^2$ ( $Z = 2$ ); $a/b = 1.21$                                    | 9767<br>1.01                                                                                                      | 3.56<br>3.36                                       | 2<br>3.36                                                                         | 10<br>4.20                                                                        | 32                                                                              |

<sup>a</sup>T: temperature of the measurement; <sup>b</sup>Col<sub>o</sub>, Col<sub>r</sub>, Col<sub>r1</sub>, Col<sub>r2</sub>: oblique and rectangular columnar structures; Orth: orthorhombic structure; <sup>c</sup> $a, b, \gamma, A = a \times b \times \sin \gamma, Z, a/b$ : lattice parameters, lattice area, number of molecular elementary motif per lattice and lattice parameter ratio; <sup>d</sup> $c, V$ : lattice parameter and cell volume of Orth mesophase; <sup>e</sup> $V_{\text{mol}}, \rho$ : molecular volume and density; <sup>f</sup> $N_{\text{mol}}$ : number of molecules per cell (Orth mesophase); <sup>g</sup> $h_{\pi}$ : average distance between stacked triphenylene (Tph) rings from position of scattering maximum in pattern;  $h_{\text{mol}} = (Z \times V_{\text{mol}}) / A$ : molecular slice thickness; <sup>h</sup> $Z_{\text{col,RhA}}, h_{\text{RhA}} = (Z_{\text{col,RhA}} / Z) \times h_{\text{mol}}$ : number of piles per lattice and molecular slice thicknesses for rhodium complexes and counter-ions (RhA);  $N_{\text{RhA},c} = c / h_{\text{RhA}}$ : number of RhA units per pile and unit cell (Orth phase); <sup>i</sup> $Z_{\text{col,Tph}}, h_{\text{Tph}} = (Z_{\text{col,Tph}} / 4Z) \times h_{\text{mol}}$  number of columns per lattice and molecular slice thicknesses for Tph;  $N_{\text{Tph},c} = c / h_{\text{Tph}}$ : number of Tph units per column and unit cell; <sup>j</sup> $\langle \psi_{\text{Tph}} \rangle = \text{acos}(h_{\pi} / h_{\text{Tph,col}})$ : mean out of plane tilt angles of piled Tph units;  $dh_{\text{Tph},c} = c - N_{\text{Tph},c} \times h_{\pi}$ : interruption zone thickness of segmented Tph columns (Orth phase). **For the meaning of "RhA units" and "Tph units" see Figure 11.**

**Table ESI 5:** Table of indexation of mesophases of  $\text{Rh}(\text{L}^{\text{D1}})_4$  and  $\text{Rh}(\text{L}^{\text{D2}})_4$  salt series

| $q_{\text{exp}} (\text{\AA}^{-1})$                             | $d_{\text{exp}} (\text{\AA})$ | $I [x(\text{\AA})]$ | $hk$                           | $q_{\text{cal}} (\text{\AA}^{-1})$ | $d_{\text{cal}} (\text{\AA})$ | Mesophase parameters     |
|----------------------------------------------------------------|-------------------------------|---------------------|--------------------------------|------------------------------------|-------------------------------|--------------------------|
| Compound $\text{Rh}(\text{L}^{\text{D1}})_4\text{Cl}$ (20°C)   |                               |                     |                                |                                    |                               |                          |
| 0.1256                                                         | 50.03                         | VS                  | 11                             | 0.1257                             | 49.97                         | $\text{Col}_r$           |
| 0.1490                                                         | 42.16                         | S                   | 20                             | 0.1491                             | 42.13                         | $a = 84.2(6) \text{\AA}$ |
| 0.2024                                                         | 31.05                         | M                   | 02                             | 0.2025                             | 31.04                         | $b = 62.0(7) \text{\AA}$ |
| 0.2517                                                         | 24.96                         | S                   | 22                             | 0.2515                             | 24.99                         | $A = 5230 \text{\AA}^2$  |
| 0.2983                                                         | 21.06                         | M                   | 40                             | 0.2983                             | 21.07                         | $(Z = 2)$                |
| 0.3127                                                         | 20.09                         | M                   | 13                             | 0.3127                             | 20.09                         |                          |
| 0.3601                                                         | 17.45                         | VW                  | 42                             | 0.3605                             | 17.43                         |                          |
| 0.3770                                                         | 16.67                         | VW                  | 33                             | 0.3772                             | 16.66                         |                          |
| 0.3863                                                         | 16.27                         | W                   | 51                             | 0.3863                             | 16.26                         |                          |
| 0.4051                                                         | 15.51                         | W                   | 04                             | 0.4049                             | 15.52                         |                          |
| 1.43                                                           | 4.4                           | VS [13]             | $h_{\text{ch}}+h_{\text{ion}}$ |                                    |                               |                          |
| 1.769                                                          | 3.55                          | W [28]              | $h_{\pi}$                      |                                    |                               |                          |
| Compound $\text{Rh}(\text{L}^{\text{D1}})_4\text{Cl}$ (80°C)   |                               |                     |                                |                                    |                               |                          |
| 0.1260                                                         | 49.87                         | VS                  | 11                             | 0.1261                             | 49.83                         | $\text{Col}_r$           |
| 0.1493                                                         | 42.09                         | S                   | 20                             | 0.1494                             | 42.07                         | $a = 84.1(4) \text{\AA}$ |
| 0.2032                                                         | 30.93                         | M                   | 02                             | 0.2032                             | 30.92                         | $b = 61.8(4) \text{\AA}$ |
| 0.2522                                                         | 24.91                         | M                   | 22                             | 0.2522                             | 24.91                         | $A = 5203 \text{\AA}^2$  |
| 0.2988                                                         | 21.03                         | M                   | 40                             | 0.2987                             | 21.04                         | $(Z = 2)$                |
| 0.3138                                                         | 20.02                         | M                   | 13                             | 0.3138                             | 20.02                         |                          |
| 0.3872                                                         | 16.23                         | VW                  | 51                             | 0.3870                             | 16.24                         |                          |
| 0.4059                                                         | 15.48                         | VW                  | 04                             | 0.4064                             | 15.46                         |                          |
| 1.40                                                           | 4.5                           | VS [12]             | $h_{\text{ch}}+h_{\text{ion}}$ |                                    |                               |                          |
| 1.745                                                          | 3.60                          | M [20]              | $h_{\pi}$                      |                                    |                               |                          |
| Compound $\text{Rh}(\text{L}^{\text{D1}})_4\text{BF}_4$ (20°C) |                               |                     |                                |                                    |                               |                          |
| 0.1260                                                         | 49.85                         | VS                  | 11                             | 0.1262                             | 49.80                         | $\text{Col}_r$           |

|        |       |         |                                |        |       |                           |
|--------|-------|---------|--------------------------------|--------|-------|---------------------------|
| 0.1494 | 42.07 | S       | 20                             | 0.1494 | 42.06 | $a = 84.1(2) \text{ \AA}$ |
| 0.2033 | 30.90 | M       | 02                             | 0.2033 | 30.90 | $b = 61.8(0) \text{ \AA}$ |
| 0.2525 | 24.88 | M       | 22                             | 0.2523 | 24.90 | $A = 5199 \text{ \AA}^2$  |
| 0.2989 | 21.02 | M       | 40                             | 0.2988 | 21.03 | $(Z = 2)$                 |
| 0.3140 | 20.01 | M       | 13                             | 0.3140 | 20.01 |                           |
| 0.3872 | 16.23 | VW      | 51                             | 0.3871 | 16.23 |                           |
| 0.4059 | 15.48 | VW      | 04                             | 0.4067 | 15.45 |                           |
| 1.43   | 4.4   | VS [13] | $h_{\text{ch}}+h_{\text{ion}}$ |        |       |                           |
| 1.776  | 3.54  | M [20]  | $h_{\pi}$                      |        |       |                           |

---

| $q_{\text{exp}} (\text{\AA}^{-1})$                                               | $d_{\text{exp}} (\text{\AA})$ | $I [x(\text{\AA})]$ | $hk$                             | $q_{\text{cal}} (\text{\AA}^{-1})$ | $d_{\text{cal}} (\text{\AA})$ | Mesophase parameters                 |
|----------------------------------------------------------------------------------|-------------------------------|---------------------|----------------------------------|------------------------------------|-------------------------------|--------------------------------------|
| <b>Compound <math>\text{Rh}(\text{L}^{\text{D1}})_4\text{BF}_4</math> (80°C)</b> |                               |                     |                                  |                                    |                               |                                      |
| 0.1209                                                                           | 51.95                         | VS                  | 110                              | 0.1210                             | 51.91                         | Col <sub>r</sub>                     |
| 0.1269                                                                           | 49.52                         | VS                  | 11                               | 0.1267                             | 49.61                         | $a = 83.9(6) \text{\AA}$             |
| 0.1348                                                                           | 46.63                         | S                   | 200                              | 0.1345                             | 46.70                         | $b = 61.4(9) \text{\AA}$             |
| 0.1497                                                                           | 41.98                         | S                   | 20                               | 0.1497                             | 41.98                         | $A = 5163 \text{\AA}^2$              |
| 0.2012                                                                           | 31.23                         | M                   | 020                              | 0.2012                             | 31.23                         | ( $Z = 2$ )                          |
| 0.2040                                                                           | 30.80                         | M                   | 02                               | 0.2044                             | 30.75                         |                                      |
| 0.2432                                                                           | 25.84                         | W                   | 220                              | 0.2421                             | 25.96                         | Orth                                 |
| 0.2536                                                                           | 24.78                         | M                   | 22                               | 0.2533                             | 24.80                         | $a = 93.4(0) \text{\AA}$             |
| 0.2575                                                                           | 24.40                         | W                   | 002                              | 0.2594                             | 24.22                         | $b = 62.4(5) \text{\AA}$             |
| 0.2692                                                                           | 23.34                         | M                   | 400                              | 0.2691                             | 23.35                         | $c = 48.4(4) \text{\AA}$             |
| 0.2861                                                                           | 21.96                         | W                   | 112                              | 0.2863                             | 21.95                         | $A = a \times b = 5833 \text{\AA}^2$ |
| 0.2943                                                                           | 21.35                         | W                   | 202                              | 0.2922                             | 21.50                         | ( $Z = 2$ )                          |
| 0.2992                                                                           | 21.00                         | W                   | 40                               | 0.2993                             | 20.99                         | $V = 282500 \text{\AA}^3$            |
| 0.3085                                                                           | 20.36                         | M                   | 130                              | 0.3092                             | 20.32                         |                                      |
| 0.3156                                                                           | 19.91                         | W                   | 13                               | 0.3155                             | 19.91                         |                                      |
| 0.3363                                                                           | 18.68                         | W                   | 420                              | 0.3360                             | 18.70                         |                                      |
| 0.3505                                                                           | 17.93                         | W                   | 510                              | 0.3511                             | 17.90                         |                                      |
| 0.3627                                                                           | 17.32                         | W                   | 42                               | 0.3625                             | 17.34                         |                                      |
|                                                                                  |                               | W                   | 330                              | 0.3631                             | 17.30                         |                                      |
| 0.3795                                                                           | 16.56                         | VW                  | 33                               | 0.3800                             | 16.54                         |                                      |
| 0.3883                                                                           | 16.18                         | VW                  | 51                               | 0.3879                             | 16.20                         |                                      |
| 0.4026                                                                           | 15.61                         | VW                  | 040                              | 0.4024                             | 15.61                         |                                      |
|                                                                                  |                               |                     | 600                              | 0.4036                             | 15.57                         |                                      |
| 1.40                                                                             | 4.5                           | VS [12]             | $h_{\text{ch}} + h_{\text{ion}}$ |                                    |                               |                                      |
| 1.768                                                                            | 3.55                          | W [27]              | $h_{\pi}$                        |                                    |                               |                                      |
| $q_{\text{exp}} (\text{\AA}^{-1})$                                               | $d_{\text{exp}} (\text{\AA})$ | $I [x(\text{\AA})]$ | $hk$                             | $q_{\text{cal}} (\text{\AA}^{-1})$ | $d_{\text{cal}} (\text{\AA})$ | Mesophase parameters                 |

| Compound $\text{Rh}(\text{L}^{\text{D1}})_4\text{BF}_4$ (120°C)           |       |         |                                |        |       |                                            |
|---------------------------------------------------------------------------|-------|---------|--------------------------------|--------|-------|--------------------------------------------|
| 0.1211                                                                    | 51.90 | VS      | 110                            | 0.1210 | 51.94 | Orth                                       |
| 0.1379                                                                    | 45.57 | S       | 200                            | 0.1383 | 45.44 | $a = 90.8(8) \text{ \AA}$                  |
| 0.1980                                                                    | 31.73 | VW      | 020                            | 0.1985 | 31.65 | $b = 63.3(0) \text{ \AA}$                  |
| 0.2303                                                                    | 27.28 | VW      | 310                            | 0.2299 | 27.33 | $c = 48.3(7) \text{ \AA}$                  |
| 0.2423                                                                    | 25.93 | W       | 220                            | 0.2419 | 25.97 | $A = a \times b = 5753$<br>$\text{ \AA}^2$ |
| 0.2596                                                                    | 24.21 | M       | 002                            | 0.2598 | 24.18 | ( $Z = 2$ )                                |
| 0.2766                                                                    | 22.72 | M       | 400                            | 0.2765 | 22.72 | $V = 278300 \text{ \AA}^3$                 |
| 0.2877                                                                    | 21.84 | VW      | 112                            | 0.2866 | 21.92 |                                            |
| 0.2946                                                                    | 21.32 | W       | 202                            | 0.2943 | 21.35 |                                            |
| 0.3059                                                                    | 20.54 | M       | 130                            | 0.3057 | 20.55 |                                            |
| 0.3404                                                                    | 18.46 | VW      | 420                            | 0.3404 | 18.46 |                                            |
| 0.3608                                                                    | 17.41 | W       | 510                            | 0.3597 | 17.47 |                                            |
|                                                                           |       |         | 330                            | 0.3629 | 17.31 |                                            |
| 1.39                                                                      | 4.5   | VS [12] | $h_{\text{ch}}+h_{\text{ion}}$ |        |       |                                            |
| 1.745                                                                     | 3.60  | W [28]  | $h_{\pi}$                      |        |       |                                            |
| Compound $\text{Rh}(\text{L}^{\text{D1}})_4\text{Au}(\text{CN})_2$ (20°C) |       |         |                                |        |       |                                            |
| 0.1229                                                                    | 51.12 | VS      | 11                             | 0.1232 | 51.01 | $\text{Col}_{\text{r1}}$                   |
| 0.1457                                                                    | 43.13 | S       | 20                             | 0.1459 | 43.08 | $a = 86.1(5) \text{ \AA}$                  |
| 0.1985                                                                    | 31.65 | M       | 02                             | 0.1986 | 31.65 | $b = 63.2(9) \text{ \AA}$                  |
| 0.2464                                                                    | 25.50 | S       | 22                             | 0.2464 | 25.50 | $A = 5452 \text{ \AA}^2$                   |
| 0.2919                                                                    | 21.53 | M       | 40                             | 0.2917 | 21.54 | ( $Z = 2$ )                                |
| 0.3067                                                                    | 20.49 | M       | 13                             | 0.3066 | 20.49 |                                            |
| 0.3705                                                                    | 16.96 | VW      | 33                             | 0.3696 | 17.00 |                                            |
| 0.3771                                                                    | 16.66 | VW      | 51                             | 0.3779 | 16.62 |                                            |
| 0.3974                                                                    | 15.81 | VW      | 04                             | 0.3971 | 15.82 |                                            |
| 0.4704                                                                    | 13.36 | VW      | 53                             | 0.4708 | 13.34 |                                            |
| 1.43                                                                      | 4.4   | VS [13] | $h_{\text{ch}}+h_{\text{ion}}$ |        |       |                                            |
| 1.775                                                                     | 3.54  | W [25]  | $h_{\pi}$                      |        |       |                                            |

| $q_{\text{exp}} (\text{\AA}^{-1})$                                               | $d_{\text{exp}} (\text{\AA})$ | $I [x(\text{\AA})]$ | $hk$             | $q_{\text{cal}} (\text{\AA}^{-1})$ | $d_{\text{cal}} (\text{\AA})$ | Mesophase parameters                   |       |
|----------------------------------------------------------------------------------|-------------------------------|---------------------|------------------|------------------------------------|-------------------------------|----------------------------------------|-------|
| <b>Compound <math>\text{Rh}(\text{L}^{\text{D2}})_4\text{BF}_4</math> (70°C)</b> |                               |                     |                  |                                    |                               |                                        |       |
| 0.1138                                                                           | 55.23                         | VS                  | $1\bar{1}$       | 0.1135                             | 55.38                         | $\text{Col}_o$                         |       |
| 0.1206                                                                           | 52.11                         | S                   | 11               | 0.1206                             | 52.09                         | $a = 84.7(7) \text{\AA}$               |       |
| 0.1480                                                                           | 42.45                         | M                   | 20               | 0.1485                             | 42.30                         | $b = 69.5(4) \text{\AA}$               |       |
| 0.1803                                                                           | 34.86                         | M                   | 02               | 0.1811                             | 34.70                         | $g = 93.5(8)^\circ$                    |       |
| 0.2276                                                                           | 27.61                         | W                   | [ $2\bar{2}$     | 0.2269                             | 27.69                         | $A = 5883 \text{\AA}^2$<br>( $Z = 2$ ) |       |
| 0.2431                                                                           | 25.85                         | S                   |                  | 22                                 | 0.2413                        |                                        | 26.04 |
|                                                                                  |                               |                     |                  | 31                                 | 0.2457                        |                                        | 25.57 |
| 0.2769                                                                           | 22.69                         | M                   | $1\bar{3}$       | 0.2771                             | 22.68                         |                                        |       |
| 0.2980                                                                           | 21.08                         | W                   | 40               | 0.2971                             | 21.15                         |                                        |       |
| 0.3404                                                                           | 18.46                         | W                   | [ $3\bar{3}$     | 0.3404                             | 18.46                         |                                        |       |
| 0.3612                                                                           | 17.40                         | VW                  |                  | 33                                 | 0.3619                        | 17.36                                  |       |
|                                                                                  |                               |                     |                  | 04                                 | 0.3621                        | 17.35                                  |       |
| 0.3897                                                                           | 16.12                         | VW                  | [ $5\bar{1}$     | 0.3877                             | 16.21                         |                                        |       |
|                                                                                  |                               |                     |                  | 60                                 | 0.4456                        | 14.10                                  |       |
| 0.4473                                                                           | 14.05                         | VW                  | $5\bar{3}$       | 0.4462                             | 14.08                         |                                        |       |
| 1.40                                                                             | 4.5                           | VS [12]             | $h_{\text{ch}}$  |                                    |                               |                                        |       |
| 1.508                                                                            | 4.17                          | M [150]             | $h_{\text{ion}}$ |                                    |                               |                                        |       |
| 1.743                                                                            | 3.60                          | W [50]              | $h_{\pi}$        |                                    |                               |                                        |       |



| $q_{\text{exp}} (\text{\AA}^{-1})$                                                          | $d_{\text{exp}} (\text{\AA})$ | $I [x(\text{\AA})]$ | $hk$                                                               | $q_{\text{cal}} (\text{\AA}^{-1})$ | $d_{\text{cal}} (\text{\AA})$ | Mesophase parameters                 |
|---------------------------------------------------------------------------------------------|-------------------------------|---------------------|--------------------------------------------------------------------|------------------------------------|-------------------------------|--------------------------------------|
| <b>Compound <math>\text{Rh}(\text{L}^{\text{D2}})_4\text{Au}(\text{CN})_2</math> (80°C)</b> |                               |                     |                                                                    |                                    |                               |                                      |
| 0.1136                                                                                      | 55.31                         | VS                  | $1\bar{1}$                                                         | 0.1137                             | 55.27                         | $\text{Col}_o$                       |
| 0.1228                                                                                      | 51.18                         | S                   | 11                                                                 | 0.1216                             | 51.65                         | $a = 83.7(6) \text{\AA}$             |
| 0.1502                                                                                      | 41.83                         | M                   | 20                                                                 | 0.1504                             | 41.78                         | $b = 69.5(2) \text{\AA}$             |
| 0.1808                                                                                      | 34.76                         | M                   | 02                                                                 | 0.1812                             | 34.68                         | $g = 93.9(4)^\circ$                  |
| 0.2279                                                                                      | 27.57                         | W                   | $\left[ \begin{array}{l} 2\bar{2} \\ 22 \end{array} \right.$       | 0.2274                             | 27.63                         | $A = 5810 \text{\AA}^2$<br>$(Z = 2)$ |
|                                                                                             |                               |                     |                                                                    |                                    | 0.2433                        |                                      |
| 0.2472                                                                                      | 25.42                         | S                   | 31                                                                 | 0.2488                             | 25.25                         |                                      |
| 0.2763                                                                                      | 22.74                         | M                   | $1\bar{3}$                                                         | 0.2769                             | 22.69                         |                                      |
| 0.3022                                                                                      | 20.79                         | W                   | $\left[ \begin{array}{l} 40 \\ 4\bar{2} \end{array} \right.$       | 0.3008                             | 20.89                         |                                      |
|                                                                                             |                               |                     |                                                                    |                                    | 0.3403                        | 18.46                                |
| 0.3414                                                                                      | 18.41                         | W                   | $\left[ \begin{array}{l} \bar{3}\bar{3} \\ 42 \end{array} \right.$ | 0.3411                             | 18.42                         |                                      |
|                                                                                             |                               |                     |                                                                    |                                    | 0.3616                        | 17.37                                |
| 0.3626                                                                                      | 17.33                         | VW                  | 04                                                                 | 0.3624                             | 17.34                         |                                      |
| 0.4541                                                                                      | 13.84                         | VW                  | $1\bar{5}$                                                         | 0.4540                             | 13.84                         |                                      |
|                                                                                             |                               |                     | $4\bar{4}$                                                         | 0.4547                             | 13.82                         |                                      |
| 0.4874                                                                                      | 12.89                         | VW                  | 44                                                                 | 0.4866                             | 12.91                         |                                      |
| 1.39                                                                                        | 4.5                           | VS [11]             | $h_{\text{ch}}$                                                    |                                    |                               |                                      |
| 1.499                                                                                       | 4.19                          | M [150]             | $h_{\text{ion}}$                                                   |                                    |                               |                                      |
| 1.765                                                                                       | 3.56                          | W [45]              | $h_{\pi}$                                                          |                                    |                               |                                      |

$q_{\text{exp}}$ ,  $d_{\text{exp}}$ ,  $q_{\text{cal}}$ ,  $d_{\text{cal}}$ : experimental and calculated scattering vectors and d-spacings from peak position;  $x$  ( $\text{\AA}$ ): correlation length from peak width using Scherrer equation with shape factor  $K = 0.9$  (no indication: long-range periodicity from sharp reflection);  $I$ : intensity of reflection, signal intensity code: VS = very strong, S = strong, M = medium, W = weak, VW = very weak; ( $hk$ ) are the Miller indices of the reflections;  $h_{\text{ch}}$  ( $\text{\AA}$ ): average lateral distances between molten chains;  $h_{\text{ion}}$  ( $\text{\AA}$ ): local-range periodicity of the ionic arrangement;  $h_{\text{p}}$  ( $\text{\AA}$ ): average piling distance along triphenylene columns;  $\text{Col}_r$ ,  $\text{Col}_{r1}$ ,  $\text{Col}_{r2}$ : rectangular columnar mesophases;  $\text{Col}_h$ ; hexagonal columnar mesophase; Orth: orthorhombic mesophase;  $a$ ,  $b$ ,  $A$ ,  $Z$ : columnar lattice parameters, lattice area and number of molecular stacks per lattice;  $c$ ,  $V$ : lattice parameter in the direction of molecular piling and cell volume.

## Small and wide-angle X-ray scattering (SAXS/WAXS) patterns of the complexes

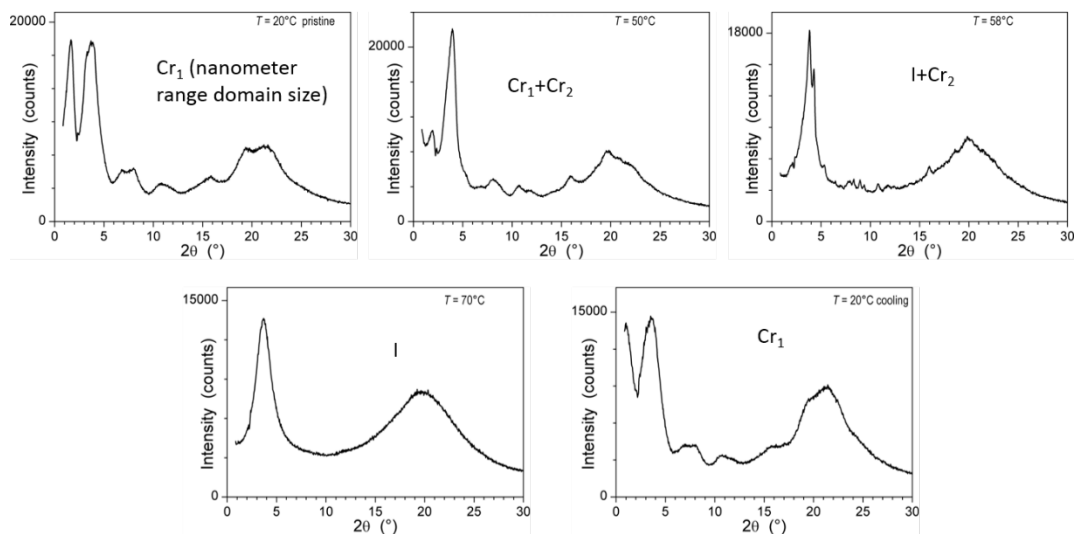

**Figures ESI42.** SAXS/WAXS patterns of ligand  $L^{D2}$ , at various temperatures, showing the co-existence of poorly developed crystalline phases.

**Figures ESI43.** Small- and wide-angle X-ray scattering (SAXS/WAXS) patterns (bottom and top graphs, respectively) of the pristine solid states ( $T = 20^\circ\text{C}$ ) of  $[\text{Rh}(L^{D1})_4]\text{Cl}$ ,  $[\text{Rh}(L^{D1})_4]\text{BF}_4$ ,  $[\text{Rh}(L^{D1})_4][\text{Au}(\text{CN})_2]$ ,  $[\text{Rh}(L^{D2})_4]\text{BF}_4$  and  $[\text{Rh}(L^{D2})_4][\text{Au}(\text{CN})_2]$  (from left-to-right and top-to-bottom).

The compounds self-organize into multisegregated structures with self-assembled organometallic cores distinct from piled triphenylene mesogens and nanosegregated from alkyl tails and linkers. As shown by the presence of only broad signals, the structure is initially only defined at the local range, between few neighboring molecules. Furthermore, the scattering signature of triphenylene stacking  $h_\pi$  (expected at ca.  $3.5 \text{ \AA}$ ) is not separable from scattering contributions of other molecular segments  $h_{\text{lat}}$ , which indicates a rather irregular piling. The formation of the superlattice of intermingled domains is however demonstrated by two intense signals appearing in the small-angle region: a broad peak  $D_{\text{Rh}/\text{Tph}}$ , from the average spacing of triphenylenes or organometallic domains separated by chains, and a peak  $D_{\text{Rh}}$  from the average spacing of Rh complex domains.

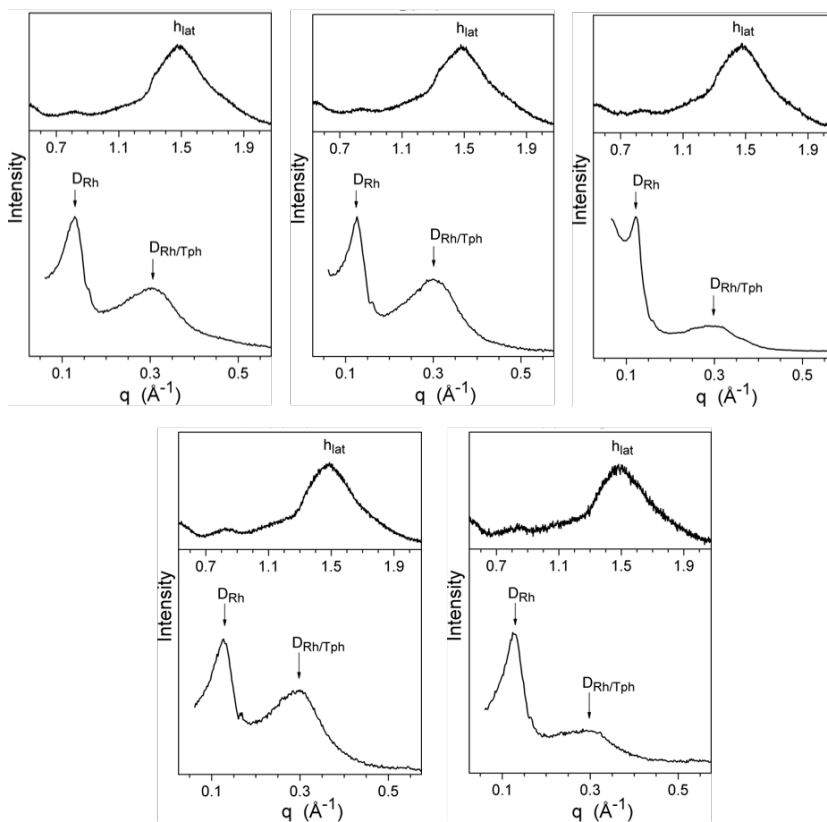

**Figures ESI44.** SAXS/WAXS patterns on first heating in pre-developed mesophases of  $[\text{Rh}(\text{L}^{\text{D1}})_4]\text{Cl}$

( $T = 65^\circ\text{C}$ ),  $[\text{Rh}(\text{L}^{\text{D1}})_4]\text{BF}_4$  ( $T = 80^\circ\text{C}$ ),  $[\text{Rh}(\text{L}^{\text{D1}})_4][\text{Au}(\text{CN})_2]$  ( $T = 80^\circ\text{C}$ ),  $[\text{Rh}(\text{L}^{\text{D2}})_4]\text{BF}_4$  ( $T = 70^\circ\text{C}$ ) and  $[\text{Rh}(\text{L}^{\text{D2}})_4][\text{Au}(\text{CN})_2]$  ( $T = 80^\circ\text{C}$ ) (from left-to-right and top-to-bottom). With the fluidization, samples rearrange into mesomorphic structures, as revealed by the appearance of distinct scattering signals for the stacking of Tph ( $h_\pi$ ) and for the packing of chains and ionic moieties ( $h_{\text{ch}}$ ,  $h_{\text{ion}}$ ), and by the structuration of the two small-angle scattering signals into reflections series of the superlattice arrangement. The structuration process of  $\text{Rh}(\text{L}^{\text{D1}})_4\text{A}$  compounds was not finished at the temperature of patterns and required further heating to  $120^\circ\text{C}$ , contrarily to  $\text{Rh}(\text{L}^{\text{D2}})_4\text{A}$  compounds already displaying a small-angle region resolved into sharp reflections.

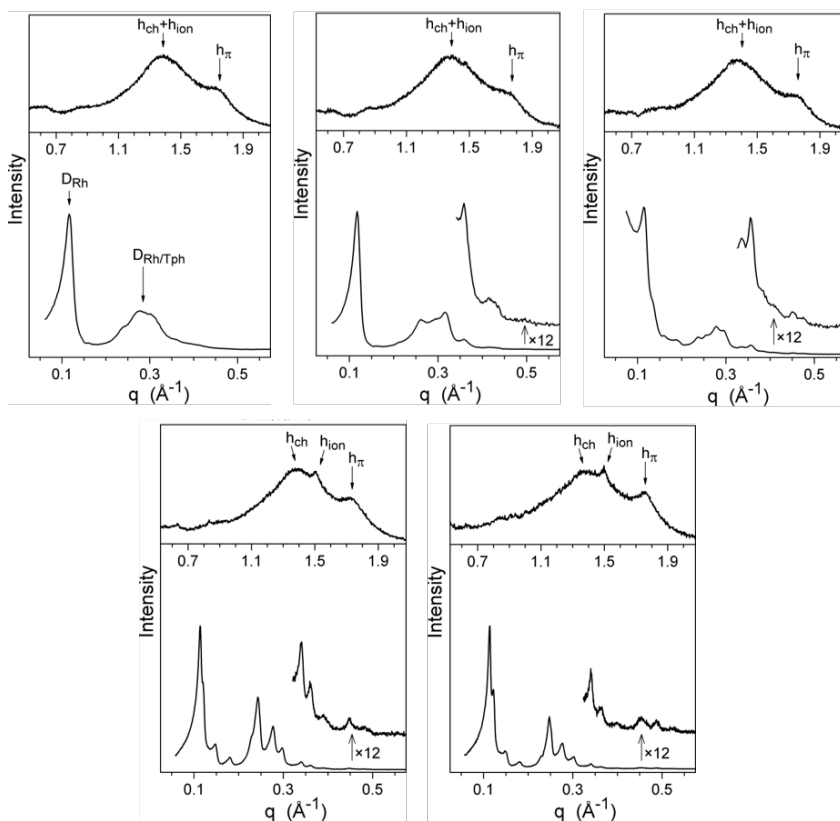

**Figures ESI45.** SAXS/WAXS patterns of the room temperature states ( $T = 20^\circ\text{C}$ ) obtained after

pre-heating in the fluid mesophases (Figures ESI44) and cooling of  $[\text{Rh}(\text{L}^{\text{D1}})_4]\text{Cl}$ ,  $[\text{Rh}(\text{L}^{\text{D1}})_4]\text{BF}_4$ ,  $[\text{Rh}(\text{L}^{\text{D1}})_4][\text{Au}(\text{CN})_2]$ ,  $[\text{Rh}(\text{L}^{\text{D2}})_4]\text{BF}_4$  and  $[\text{Rh}(\text{L}^{\text{D2}})_4][\text{Au}(\text{CN})_2]$  (from left-to-right and top-to-bottom). The three  $\text{Rh}(\text{L}^{\text{D1}})_4\text{A}$  compounds display a frozen columnar mesophase  $\text{Col}_r$ , characterized by sharp reflection series of a large-size two-dimensional rectangular  $c2mm$  lattice and by the scattering signals from  $\pi$ -stacking  $h_\pi$  and molten chain packing  $h_{\text{ch}}$ . In addition,  $\text{Rh}(\text{L}^{\text{D1}})_4\text{BF}_4$  presents a broad small-angle peak D coming from a local range periodicity and  $\text{Rh}(\text{L}^{\text{D1}})_4\text{Au}(\text{CN})_4$ , a small-angle scattering upturn due to structural disorder.  $\text{Rh}(\text{L}^{\text{D2}})_4\text{A}$  compounds on the contrary lose the long-range order on cooling

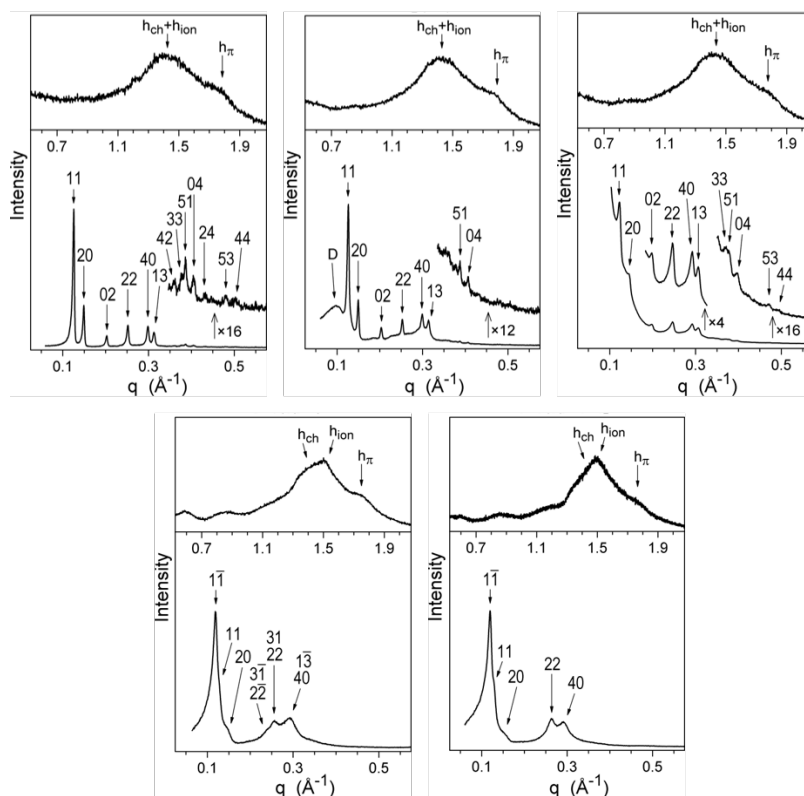

and give amorphous-like states keeping a residual columnar structure (Amo<sub>Col</sub>) correlated over few molecules, as revealed by the broadened reflections in the small-angle region and by wide-angle scattering maximums.

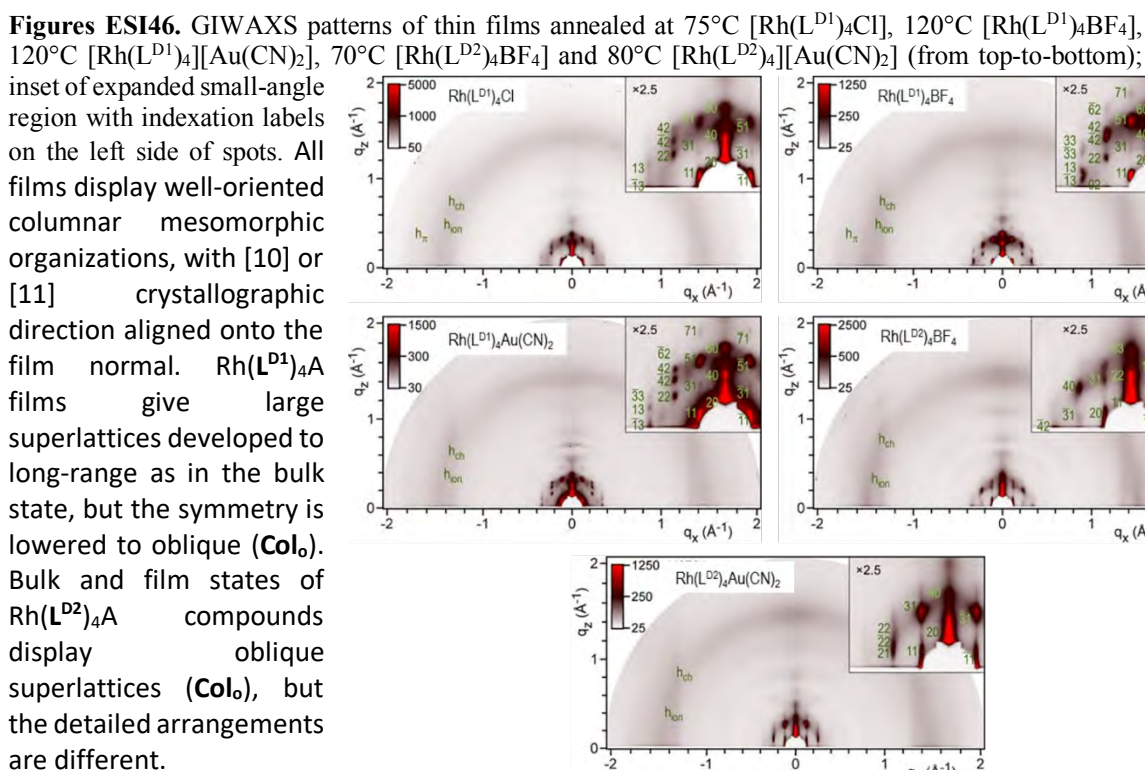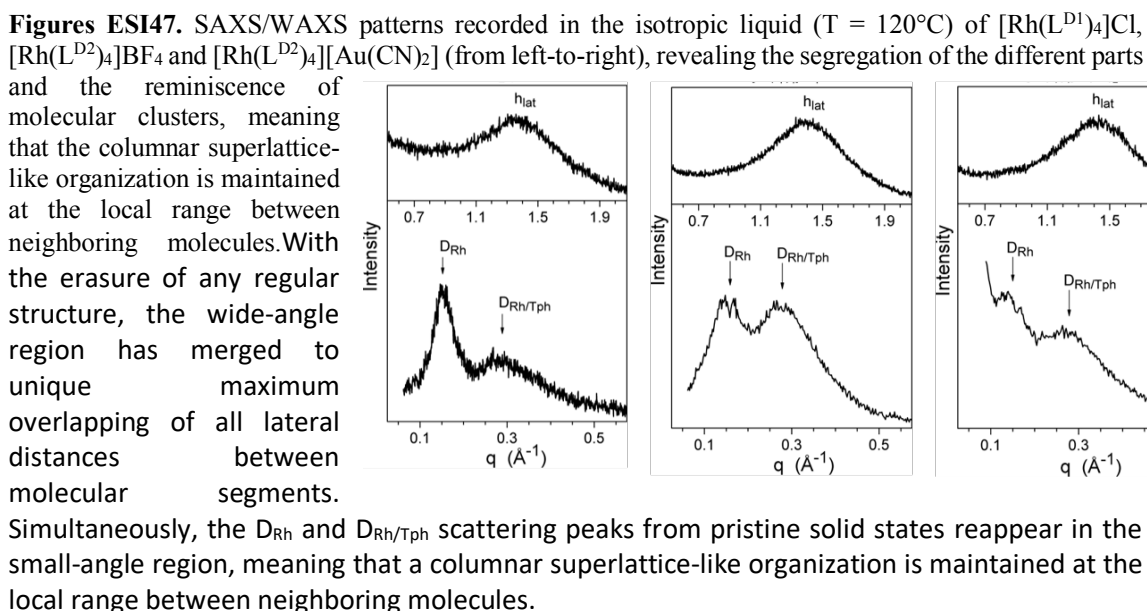

## POLARIZED OPTICAL MICROSCOPY (POM)

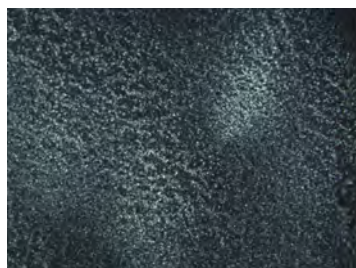

(10) 1<sup>st</sup> cooling at 100 °C

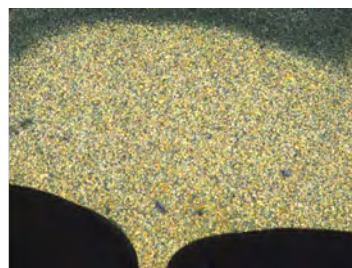

(10) 2<sup>nd</sup> cooling at 90 °C

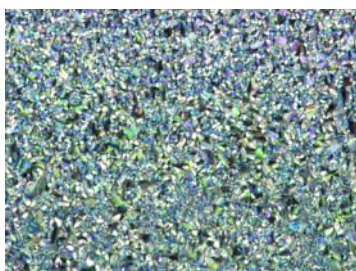

(14) 2<sup>nd</sup> cooling at 160 °C

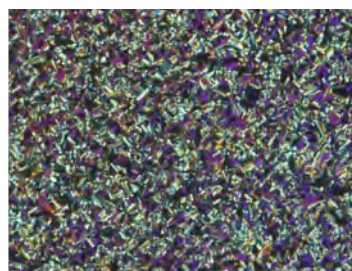

(14) 2<sup>nd</sup> cooling at 85 °C

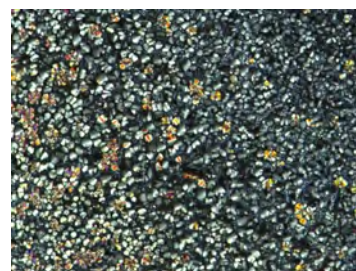

(19) 1<sup>st</sup> cooling at 120 °C

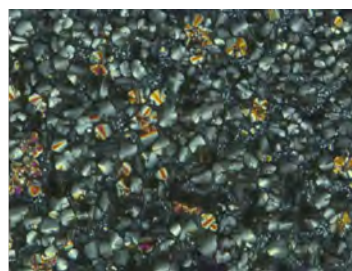

zoom

**Figures ESI48.** POM Microphotographs of  $[\text{Rh}(\text{L}^{\text{D1}})_4]\text{A}$  ( $\text{A} = \text{Cl}^-$  (10),  $\text{BF}_4^-$  (14),  $[\text{Au}(\text{CN})_2]^-$  (19)) complexes on cooling process at different temperatures.



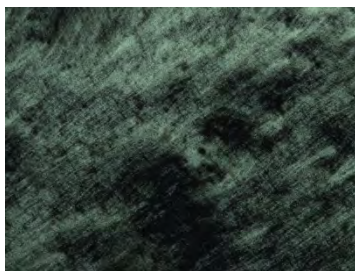

$L^{D2}$  1<sup>st</sup> cooling at 35 °C

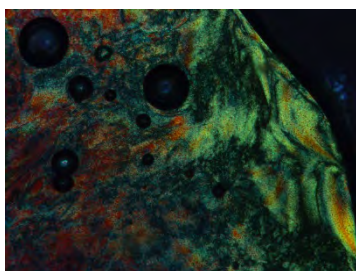

(15) 1<sup>st</sup> heating at 76 °C

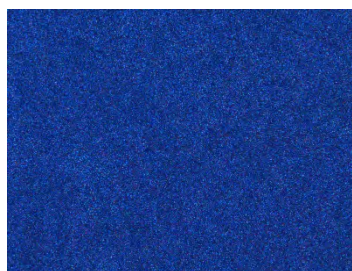

2<sup>nd</sup> cooling at 56 °C

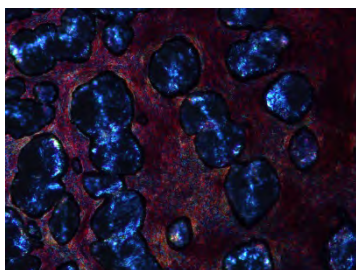

(20) 1<sup>st</sup> heating at 80 °C

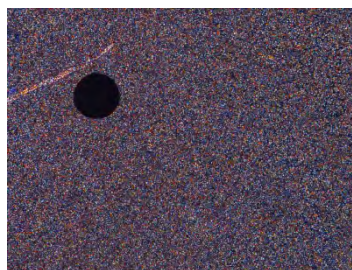

1<sup>st</sup> cooling at 95 °C

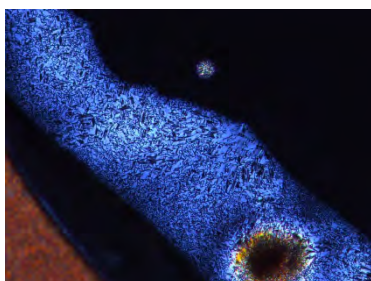

(20) 1<sup>st</sup> cooling at 92 °C

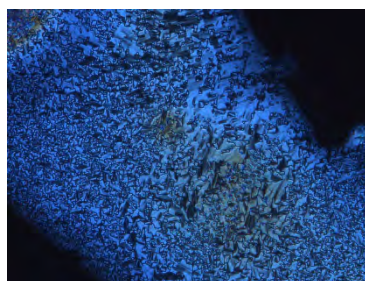

zoom 1<sup>st</sup> cooling at 30 °C

**Figures ESI49.** POM Microphotographs of  $[\text{Rh}(L^{D2})_4](A)$  complexes ( $A = \text{BF}_4^-$  (15),  $[\text{Au}(\text{CN})_2]^-$  (20)) on cooling and heating process at different temperatures.

# DIFFERENTIAL SCANNING CALORIMETRY (DSC)

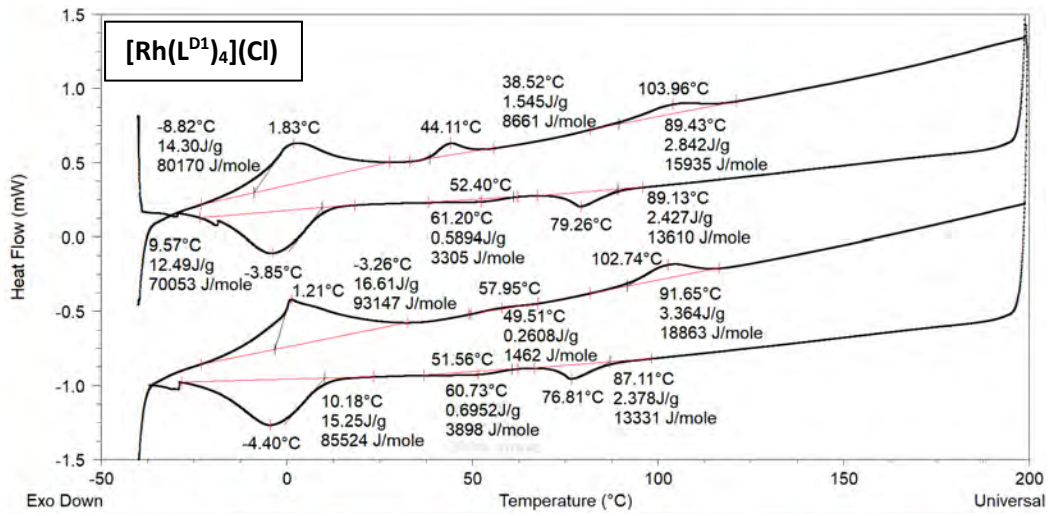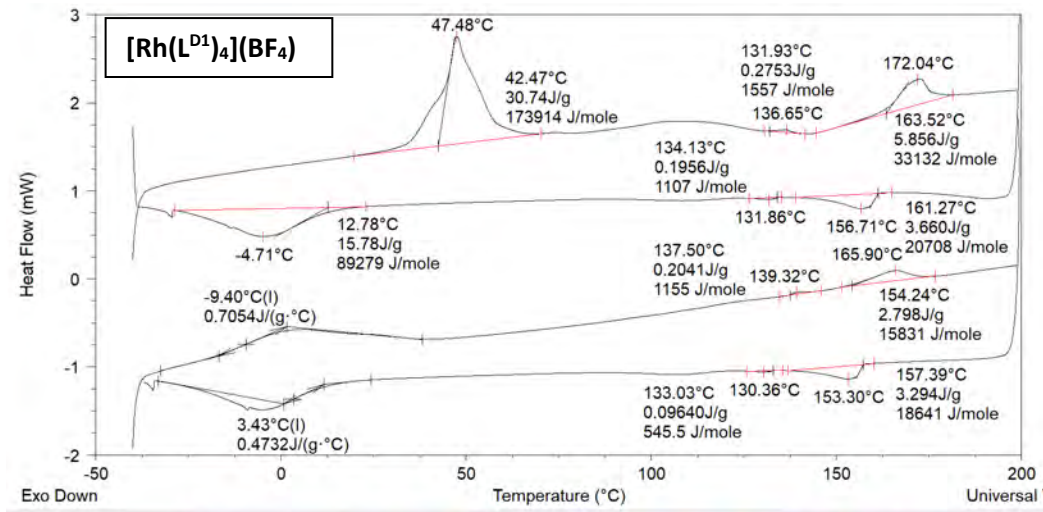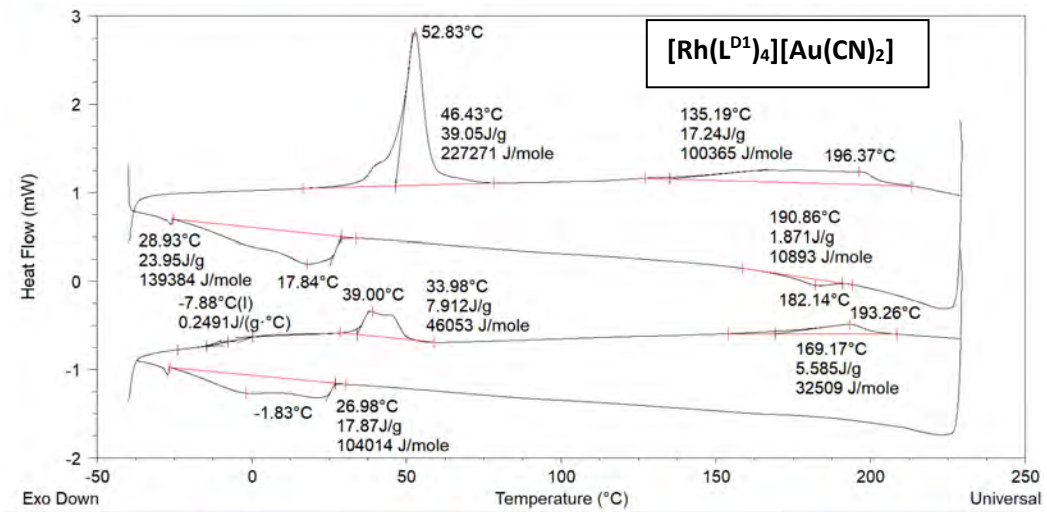

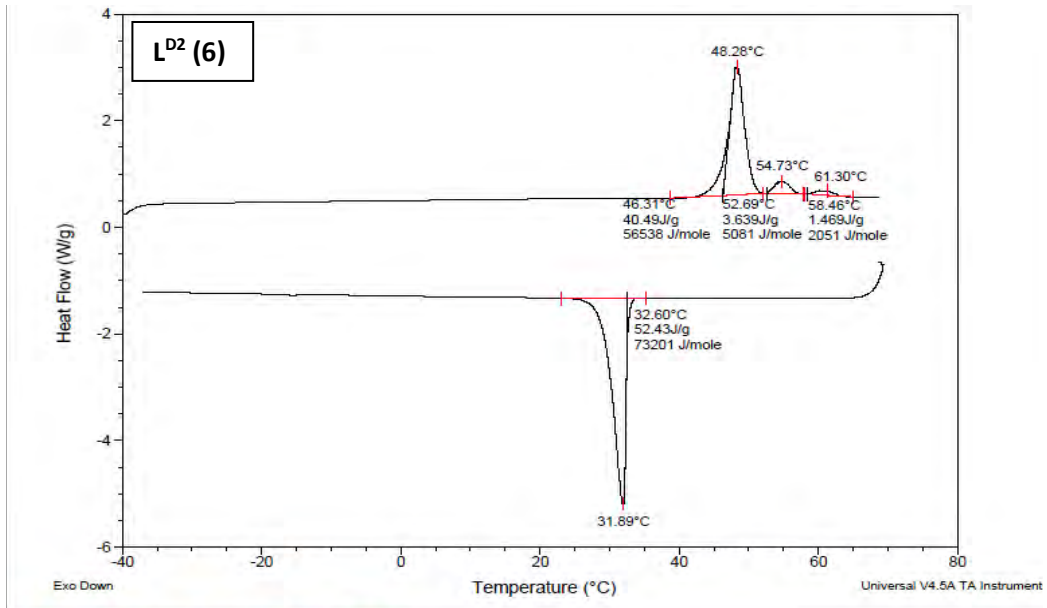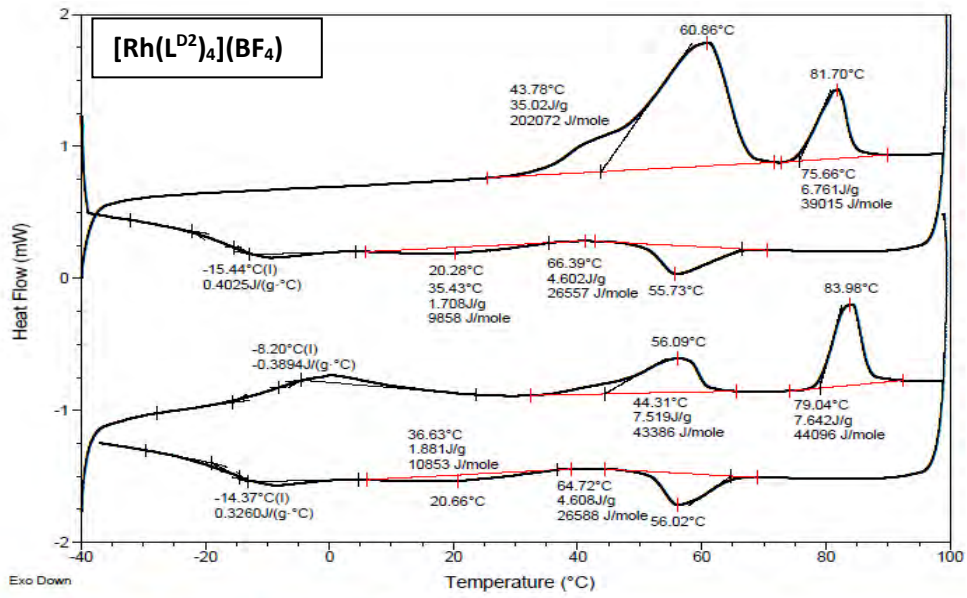



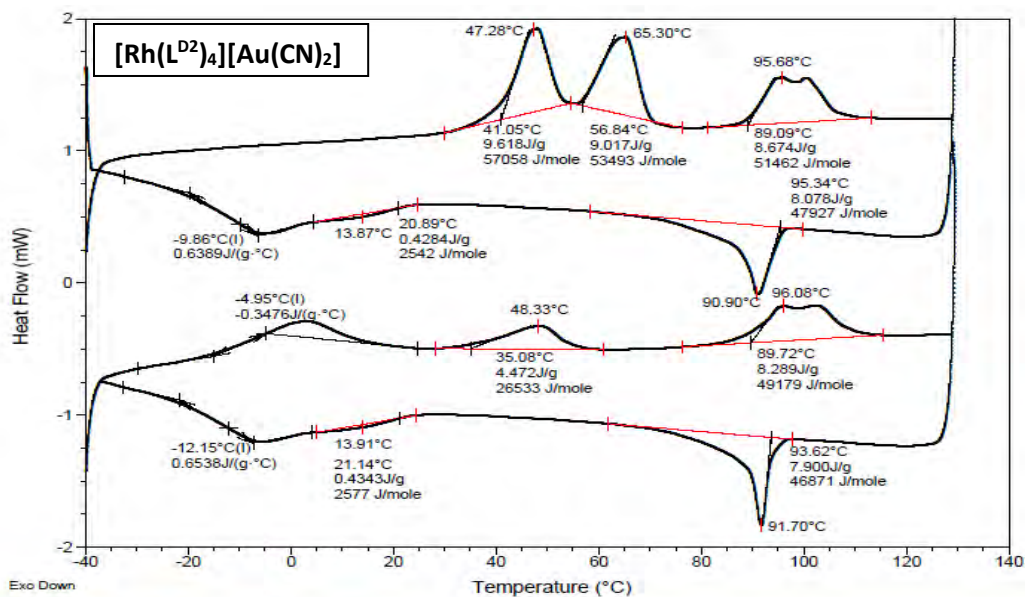

**Figure ESI50.** DSC thermograms (10 °C/min, endotherm up) of [Rh(L<sup>D1</sup>)<sub>4</sub>]Cl (**10**), [Rh(L<sup>D1</sup>)<sub>4</sub>]BF<sub>4</sub> (**14**), [Rh(L<sup>D1</sup>)<sub>4</sub>][Au(CN)<sub>2</sub>] (**19**), [Rh(L<sup>D2</sup>)<sub>4</sub>]BF<sub>4</sub> (**15**), [Rh(L<sup>D2</sup>)<sub>4</sub>][Au(CN)<sub>2</sub>] (**20**) (from top-to-bottom).

## ELECTROCHEMICAL STUDIES

### Cyclic Voltamograms

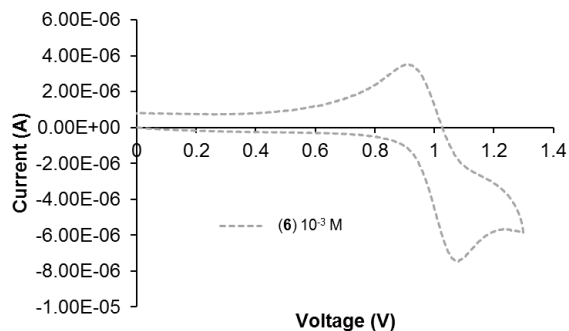

Figure ESI51. Cyclic voltammogram of 6,  $L^{D2} (10^{-3} \text{ M})$ .

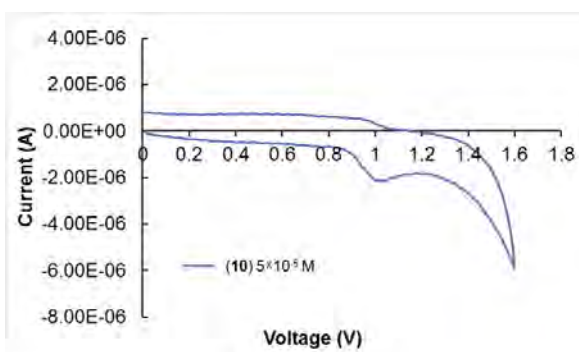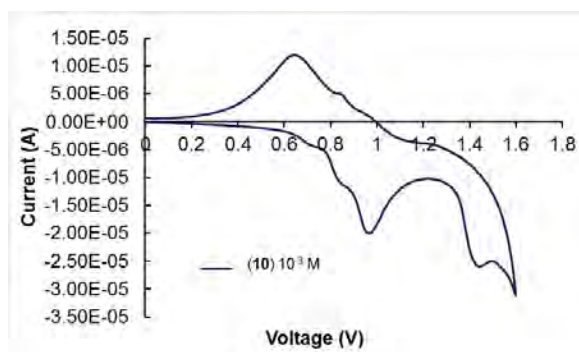

Figure ESI52. Cyclic voltammogram of 10 ( $5 \times 10^{-5} \text{ M}$ ). Figure ESI53. Cyclic voltammogram of 10 ( $10^{-3} \text{ M}$ ).

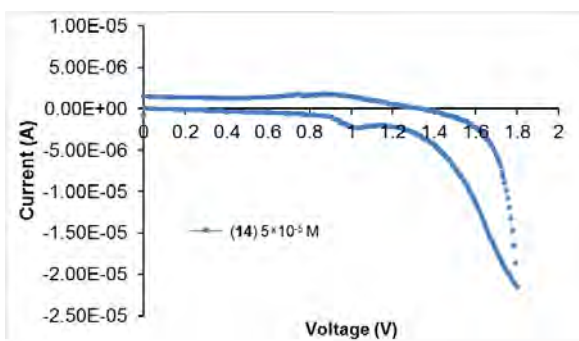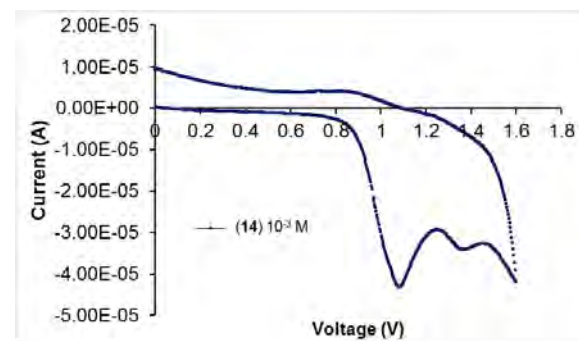

Figure ESI54. Cyclic voltammogram of 14 ( $5 \times 10^{-5} \text{ M}$ ). Figure ESI55. Cyclic voltammogram of 14 ( $10^{-3} \text{ M}$ ).

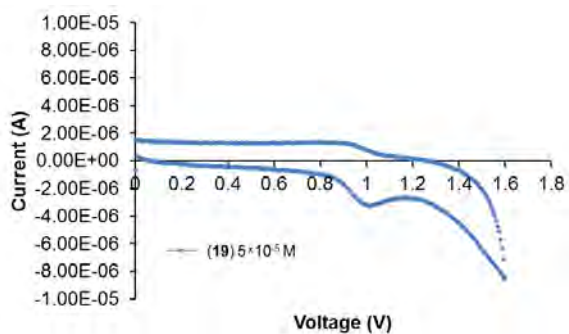

Fig. ESI56. Cyclic voltammogram of 19 ( $5 \times 10^{-5}$  M).

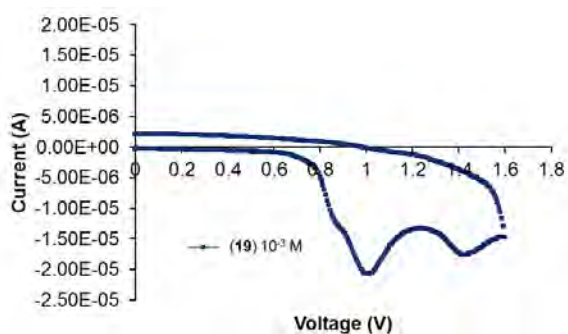

Fig. ESI57. Cyclic voltammogram of 19 ( $10^{-3}$  M).

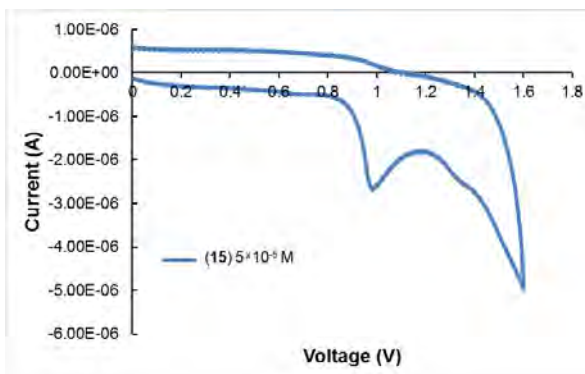

Fig. ESI58. Cyclic voltammogram of 15 ( $5 \times 10^{-5}$  M).

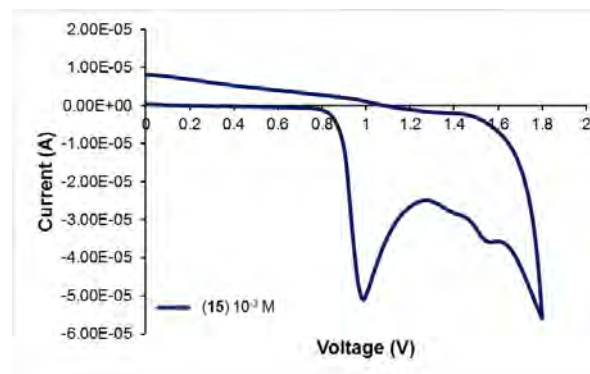

Fig. SI59. Cyclic voltammogram of 15 ( $10^{-3}$  M).

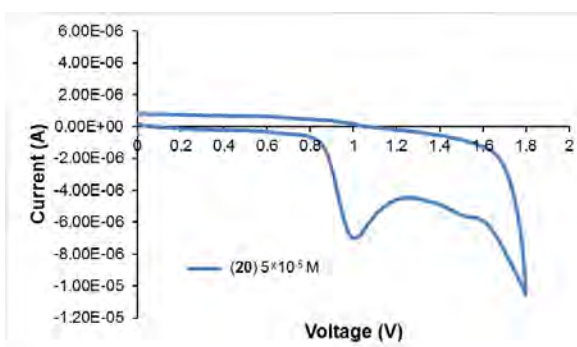

Fig. ESI60. Cyclic voltammogram of 20 ( $5 \times 10^{-5}$  M).

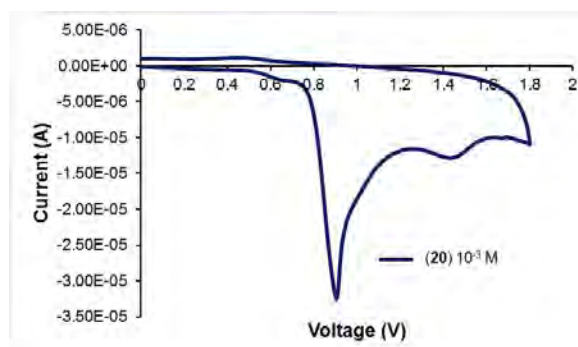

Fig. ESI61. Cyclic voltammogram of 20 ( $10^{-3}$  M).

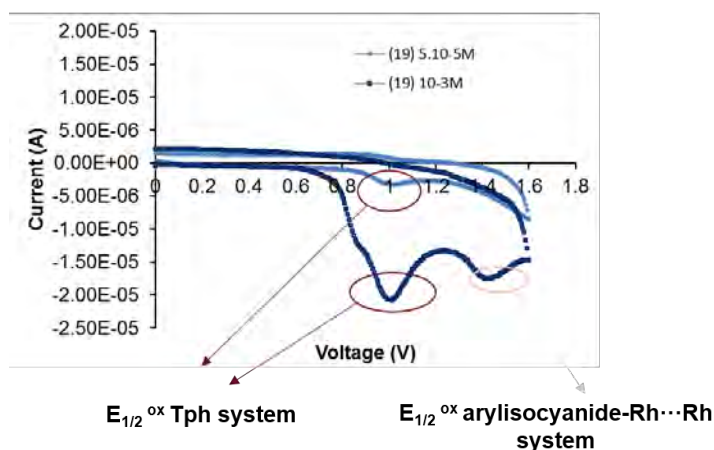

Figure ESI62. Cyclic voltammograms of **19** at different molarities.

Table ESI6. Electrochemical Parameters (HOMO and LUMO Energy Levels)

| Compound                                                                | $E_{1/2}^{ox}/V^a$ | $E_{HOMO}/eV^b$    | $E_{LUMO}/eV^c$                          | Optical gap $E_g/eV^d$                     |
|-------------------------------------------------------------------------|--------------------|--------------------|------------------------------------------|--------------------------------------------|
| <b>[Rh(L<sup>D1</sup>)<sub>4</sub>]A</b>                                |                    |                    |                                          |                                            |
| <b>L<sup>D1</sup></b>                                                   | 0.99*              | -5.33              | -1.97                                    | 3.36                                       |
| <b>10</b><br>[Rh(L <sup>D1</sup> ) <sub>4</sub> ](Cl)                   | 0.91               | -5.26 <sup>e</sup> | -1.67                                    | 3.59                                       |
|                                                                         | 1.60               | -5.95 <sup>f</sup> | -3.25 <sup>g</sup><br>-4.12 <sup>h</sup> | 2.7<br>1.83 ( $\lambda_{onset} = 680$ nm)  |
| <b>14</b><br>[Rh(L <sup>D1</sup> ) <sub>4</sub> ](BF <sub>4</sub> )     | 1.05               | -5.40 <sup>e</sup> | -1.82                                    | 3.58                                       |
|                                                                         | 1.35               | -5.70 <sup>f</sup> | -3.01 <sup>g</sup><br>-3.87 <sup>h</sup> | 2.69<br>1.83 ( $\lambda_{onset} = 680$ nm) |
| <b>19</b><br>[Rh(L <sup>D1</sup> ) <sub>4</sub> ][Au(CN) <sub>2</sub> ] | 0.98               | -5.33 <sup>e</sup> | -1.75                                    | 3.58                                       |
|                                                                         | 1.42               | -5.77 <sup>f</sup> | -3.08 <sup>g</sup><br>-3.94 <sup>h</sup> | 2.69<br>1.83 ( $\lambda_{onset} = 680$ nm) |
| <b>[Rh(L<sup>D2</sup>)<sub>4</sub>]A</b>                                |                    |                    |                                          |                                            |
| <b>6</b><br>L <sup>D2</sup>                                             | 1.08               | -5.42              | -1.83                                    | 3.59                                       |
| <b>15</b><br>[Rh(L <sup>D2</sup> ) <sub>4</sub> ](BF <sub>4</sub> )     | 0.89               | -5.24 <sup>e</sup> | -1.68                                    | 3.56                                       |
|                                                                         | 1.27               | -5.92 <sup>f</sup> | -3.22 <sup>g</sup><br>-3.44 <sup>h</sup> | 2.7<br>2.48 ( $\lambda_{onset} = 500$ nm)  |
| <b>20</b><br>[Rh(L <sup>D2</sup> ) <sub>4</sub> ][Au(CN) <sub>2</sub> ] | 1.01               | -5.36 <sup>e</sup> | -1.79                                    | 3.57                                       |
|                                                                         | 1.44               | -5.79 <sup>f</sup> | -3.08 <sup>g</sup><br>-3.31 <sup>h</sup> | 2.71<br>2.48 ( $\lambda_{onset} = 500$ nm) |

<sup>a</sup> V vs calomel electrode with a platinum working electrode in dichloromethane. <sup>b</sup>  $E_{HOMO}$  (eV) =  $-[E_{1/2}^{ox}(V) - E_{1/2}^{ox} fc(V)] - 4.8$  (eV) ( $E_{1/2}^{ox} Fc$  is the averaged oxidation potential of the system ferrocene/ferrocenium (Fc) versus the calomel electrode).<sup>11</sup> <sup>c</sup> LUMO (eV) potentials were calculated from the optical gaps observed in the absorption spectra and the HOMO potentials obtained with CV. <sup>d</sup> Optical gap calculated from  $E_g = 1242/\lambda_{onset}$ , where  $\lambda_{onset}$  is the onset of the band of the absorption spectra that appears at highest wavelength. <sup>e</sup>  $E_{HOMO}$  (eV) calculated from the irreversible oxidation potential peak for the triphenylene group.<sup>12</sup> <sup>f</sup>  $E_{HOMO}$  (eV) calculated from the irreversible oxidation potential peak for the arylisocyanide-Rh<sup>I</sup> · Rh<sup>I</sup> system. <sup>g</sup>  $E_{LUMO}$  obtained directly from the onset of the band of the absorption spectra that appears at highest wavelength at 10<sup>-5</sup> M for the arylisocyanide-Rh<sup>I</sup> · Rh<sup>I</sup> system. <sup>h</sup>  $E_{LUMO}$  (eV) calculated for a value of  $\lambda_{onset}$  (theoretical value) corresponding to the green and red colors observed for the compounds. \* Reversible process.

## HOLE MOBILITY MEASUREMENTS (SCLC Measurements)

The Space-Charge Limited Current (SCLC) method was used to measure the charge mobility of complexes **10**, **14**, **19**, **15** and **20**. The SCLC technique consists in measuring the electric current that flows through a sample placed between two electrodes as a function of the applied voltage. When applying low voltages, the current follows Ohm's law, while when applying higher voltages it can be limited by a space charge field so that the voltage dependence will no longer be linear, but will become quadratic. In this case, neglecting the effect of the traps, the dependence of the current on the voltage will be described by the Mott-Gurney law:

$$i = \frac{9}{8} \epsilon_r \epsilon_0 \mu \frac{A V^2}{d^3} \quad (1)$$

where  $i$  is the current,  $\epsilon_r$  is the relative dielectric constant of the material,  $\epsilon_0$  is the permittivity of free space,  $\mu$  is the mobility of charges,  $V$  is the applied voltage,  $A$  is the area and  $d$  is the thickness of the device.

A typical example of  $J/V$  curve for complex **15** is shown in Figure SI63

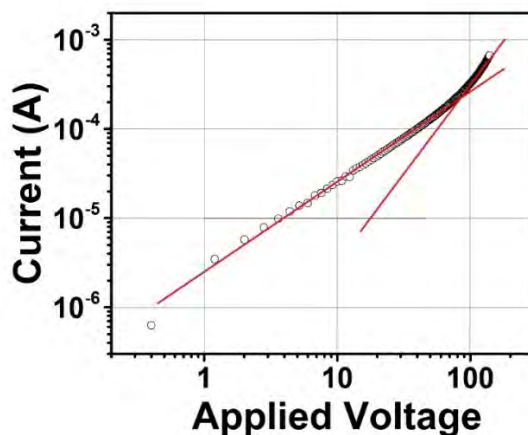

**Figure ESI63.** Current as function of the applied voltage for a sample of complex **15**. The red lines represent ideal linear and quadratic dependences.

Mobility values can be calculated starting from equation (1) only if the electrode that injects the charges forms an ohmic contact with the compound, in such a way as to act as an infinite reserve of charges. Usually, in order to obtain an ohmic contact, in the case of p-conductors, the difference between the energy of the HOMO level of the material (LUMO in the case of n-conductors) and the work function of the electrode must not be larger than 0.3-0.4 eV. In the case of the complexes measured we have used gold electrodes, which allowed to measure the mobility despite the difference in energy between the HOMO of the complexes and the work function of the electrode is a little higher than the values above mentioned.

Samples were prepared by superimposing one glass with three 1.2 mm wide gold electrodes with another glass with five 0.5 mm wide ITO electrodes, obtaining 15 independent overlapping areas. Gold electrodes were prepared by thermal deposition on glasses at a base pressure of  $10^{-6}$  mbar, while ITO electrodes are prepared by photolithography, starting from commercial fully covered ITO glasses (VisionTek 12  $\Omega$ /sq). The gold electrodes are labelled with letters (a, b, c) while the ITO ones with numbers (from 1 to 5). The substrates were glued together with an epoxy glue, controlling the thickness by 5  $\mu$ m glass spacers. The thickness actually obtained was measured by interferometry and varied between 8  $\mu$ m and 10  $\mu$ m. In figure SI64 the geometry the resulting cells is schematically illustrated.

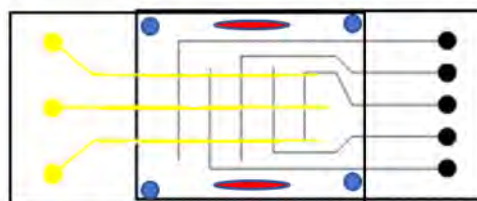

**Figure ESI64.** Illustration of a typical cell used for SCLC measurements. The yellow lines represent gold electrodes, the gray ones the ITO electrodes, blue circles are spacers, while with red the epoxy glue is indicated.

The cells thus obtained were then filled by capillarity with the complexes to be analyzed in the isotropic phase. Afterwards, samples were subjected to a thermal treatment to induce the formation of homogeneously oriented domains: first the samples were heated to the isotropic phase, then they were cooled to a temperature 0.5  $^{\circ}$ C higher than the transition from isotropic to liquid crystal, keeping this temperature for 5 hours; the temperature was then decreased by 0.2  $^{\circ}$ C, keeping the new temperature for another 5 hours. The cycle of lowering by 0.2  $^{\circ}$ C and maintaining the temperature for 5 hours was repeated several times, until a temperature of 3 $^{\circ}$ C lower than the isotropic - liquid crystal transition was reached. At that point the samples were cooled down to room temperature at 0.05  $^{\circ}$ C/min. The J/V curves were obtained by using either a Keithley 2636B, or a Keithley 6517A source meter. The dielectric constant of the different complexes was derived from capacity measurements performed on an HP 4284A Precision LCR Meter.

<sup>1</sup> D. Perrin, D.; Armarego, W. I. F. *Purification of Laboratory Chemicals*, 3rd ed., Pergamon Press, Oxford, UK, **1988**.

<sup>2</sup> G. Giordano, G.; Crabtree, R. H.; Heintz, R. M.; Forster, D.; Morris, D. E. Di- $\mu$ -Chloro-Bis( $\eta$ 4-1,5-Cyclooctadiene)-Dirhodium(I). *Inorg. Synth.*, 1990, **28**, 88–90.

<sup>3</sup> Schenck, T. G.; Downes, J. M.; Milne, C. R. C.; Mackenzie, P. B.; Boucher, H.; Whelan, J.; Bosnich, B. Bimetallic reactivity. Synthesis of bimetallic complexes containing a bis(phosphino)pyrazole ligand. *Inorg. Chem.*, **1985**, *24*, 2334–2337.

- 
- <sup>4</sup> Ugi, I.; Meyr, R. Isonitrile, I. Darstellung von Isonitrilen aus monosubstituierten Formamiden durch Wasserabspaltung. *Chem. Ver.*, **1960**, *93*, 239-248. b) Weber, W. P.; Gowel, G. W.; Ugi, I. Phase Transfer Catalysis in the Hofmann Carbylamine Reaction. *Angew. Chem., Int. Ed. Engl.*, **1972**, *11*, 530-531.
- <sup>5</sup> Tritto, E.; Chico, R.; Ortega, J.; Folcia, C. L. Folcia, Etxebarria, J.; Coco, S.; Espinet, P. Synergistic  $\pi$ - $\pi$  and Pt-Pt interactions in luminescent hybrid inorganic/organic dual columnar liquid crystals. *J. Mater. Chem. C.*, **2015**, *3*, 9385-9392.
- <sup>6</sup> CrysAlisPro Software system, version 1.171.33.51, **2009**, Oxford Diffraction Ltd, Oxford, UK.
- <sup>7</sup> Dolomanov, O. V.; Bourhis, L. J.; Gildea, R. J.; Howard, J. A. K.; Puschmann, H. OLEX2: a complete structure solution, refinement and analysis program. *J. Appl. Cryst.* **2009**, *42*, 339-341.
- <sup>8</sup> Bourhis, L. J.; Dolomanov, O. V.; Gildea, R. J.; Howard, J. A. K.; Puschmann, H. The anatomy of a comprehensive constrained, restrained refinement program for the modern computing environment-Olex2 dissected. *Acta Cryst.* **2015**, *A71*, 59-75.
- <sup>9</sup> Sheldrick, G. M. Crystal structure refinement with SHELXL. *Acta Cryst.* **2015**, *C71*, 3-8.
- <sup>10</sup> Q. Liu, M. Xie, X. Chang, Q. Gao, Y. Chen and W. Lu, *Chem. Commun.*, 2018, **54**, 12844
- <sup>11</sup> (a) Ahmida, M. M.; Eichhorn, S. H. Measurements and prediction of electronic properties of discotic triphenylenes and phthalocyanines. *ECTS Trans.*, **2010**, *25*, 1-10; (b) Mahoney, S. J.; Ahmida, M. M.; Kayal, H.; Fox N.; Shimizu, Y.; Eichhorn, S. H.; Synthesis, mesomorphism and electronic properties of nonaflate and cyano-substituted pentyloxy and 3-methylbutyloxy triphenylenes. *J. Mater. Chem.*, **2009**, *19*, 9221-9232.
- <sup>12</sup> Chico, R.; de Domingo, E.; Domínguez, C.; Donnio, B.; Heinrich, B.; Termine, R.; Golemme, A.; Coco, S.; Espinet, P. High One-Dimensional Charge Mobility in Semiconducting Columnar Mesophases of Isocyano-Triphenylene Metal Complexes. *Chem. Mater.* **2017**, *29*, 7587-7595.
